# Supplementary material
Source: PubMed Central journal article supplement (PMC6765296)

*Zea mays*

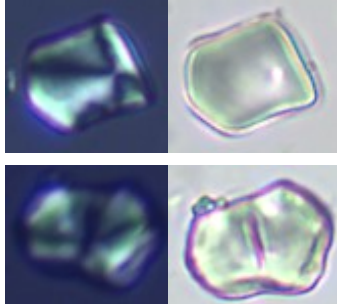

*Solanum tuberosum*

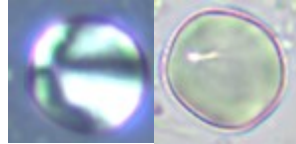

*Avena* spp.

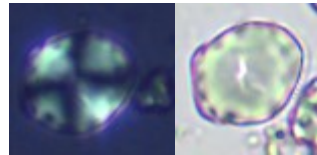

*Triticum* spp.

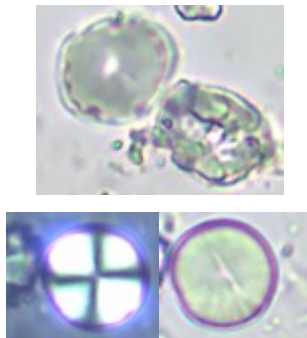

Malted *Hordeum* spp.?

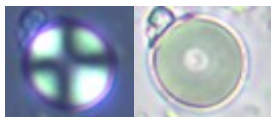

Unknown

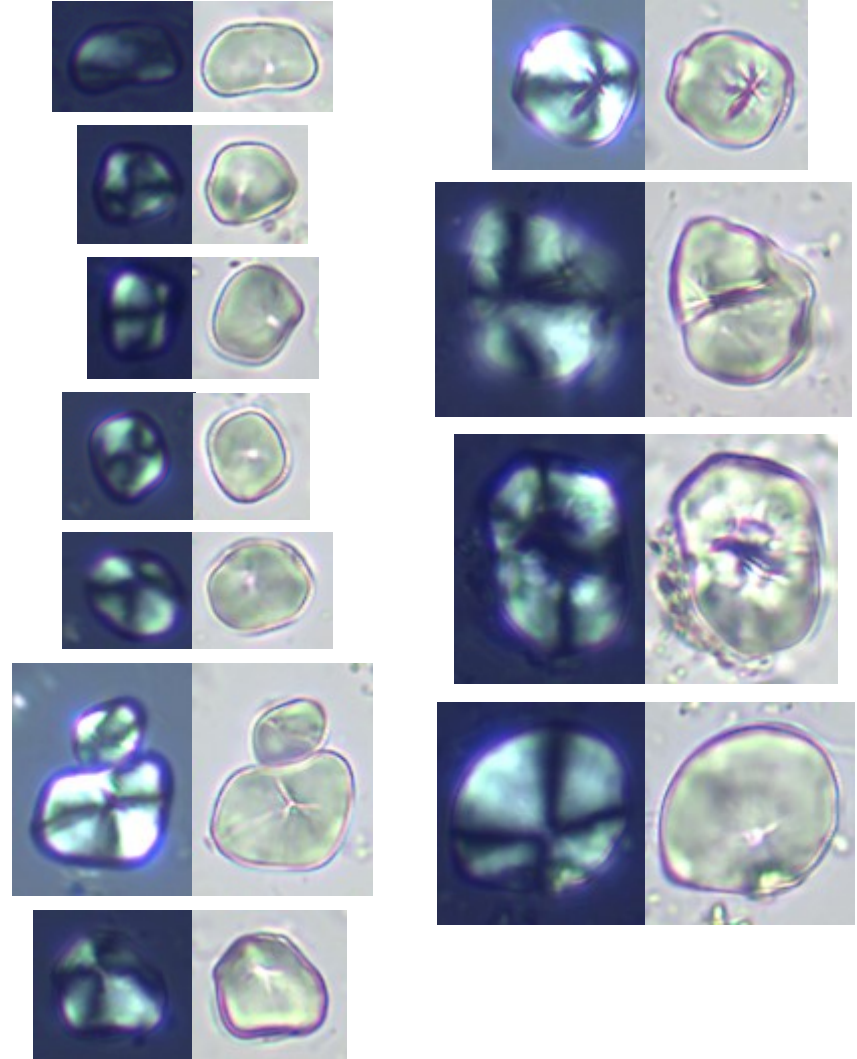

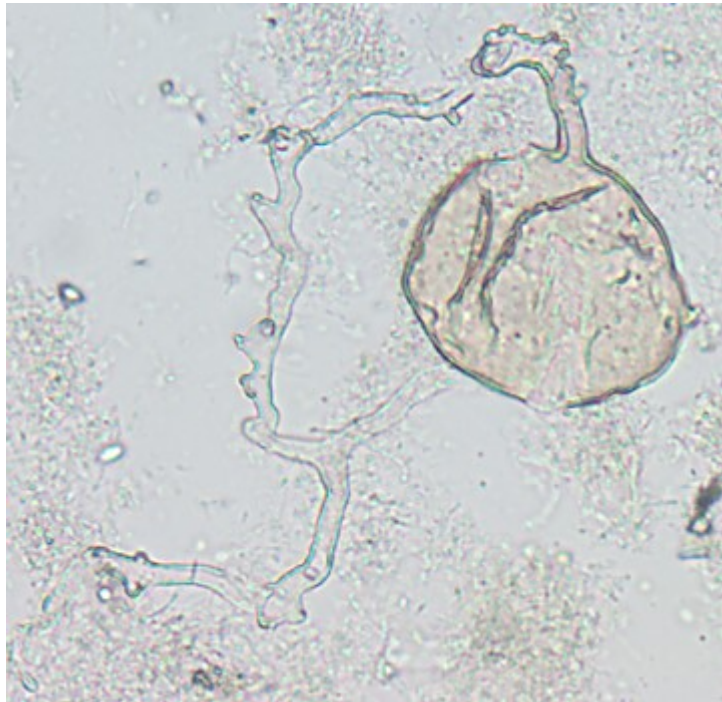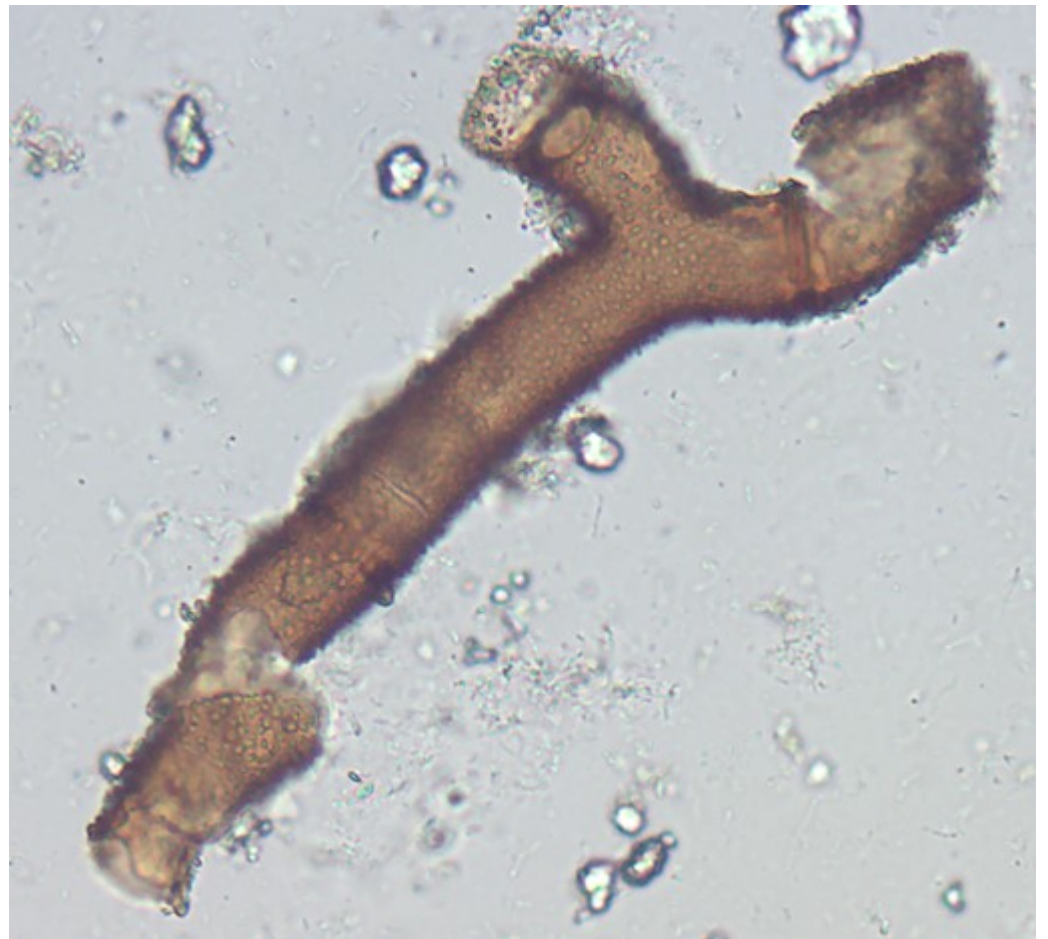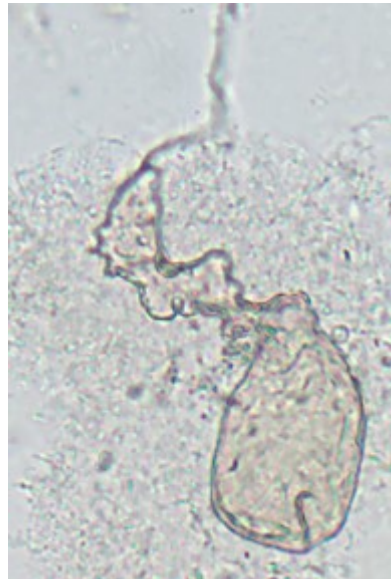

Fungus – potentially *Glomus chlamydosporae*?

Fungus – potentially *Glomus chlamydospires?*

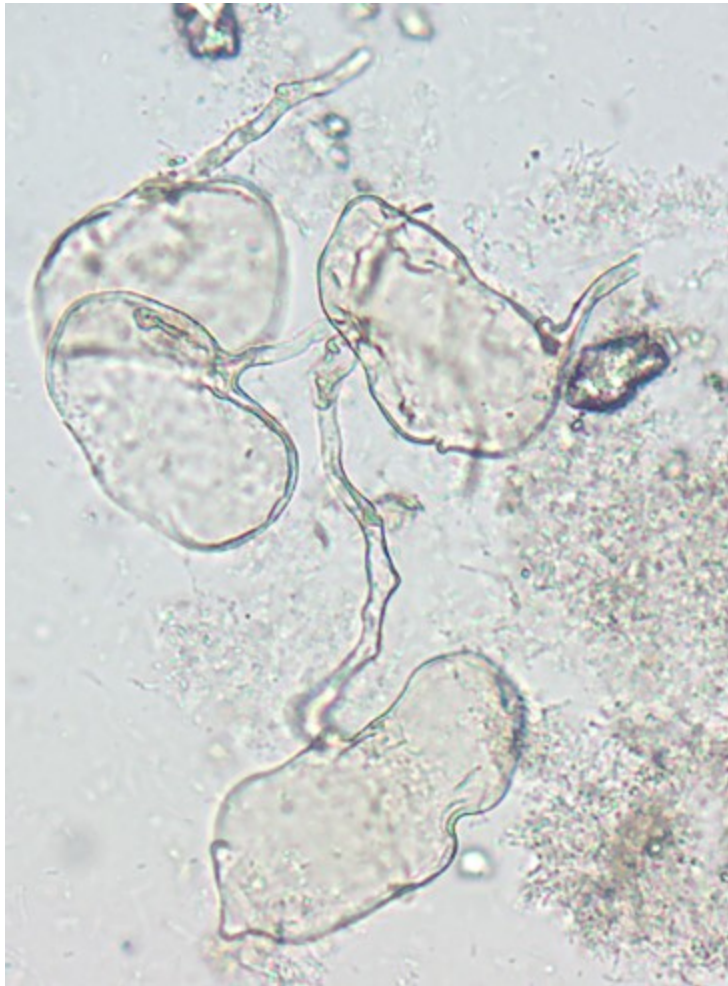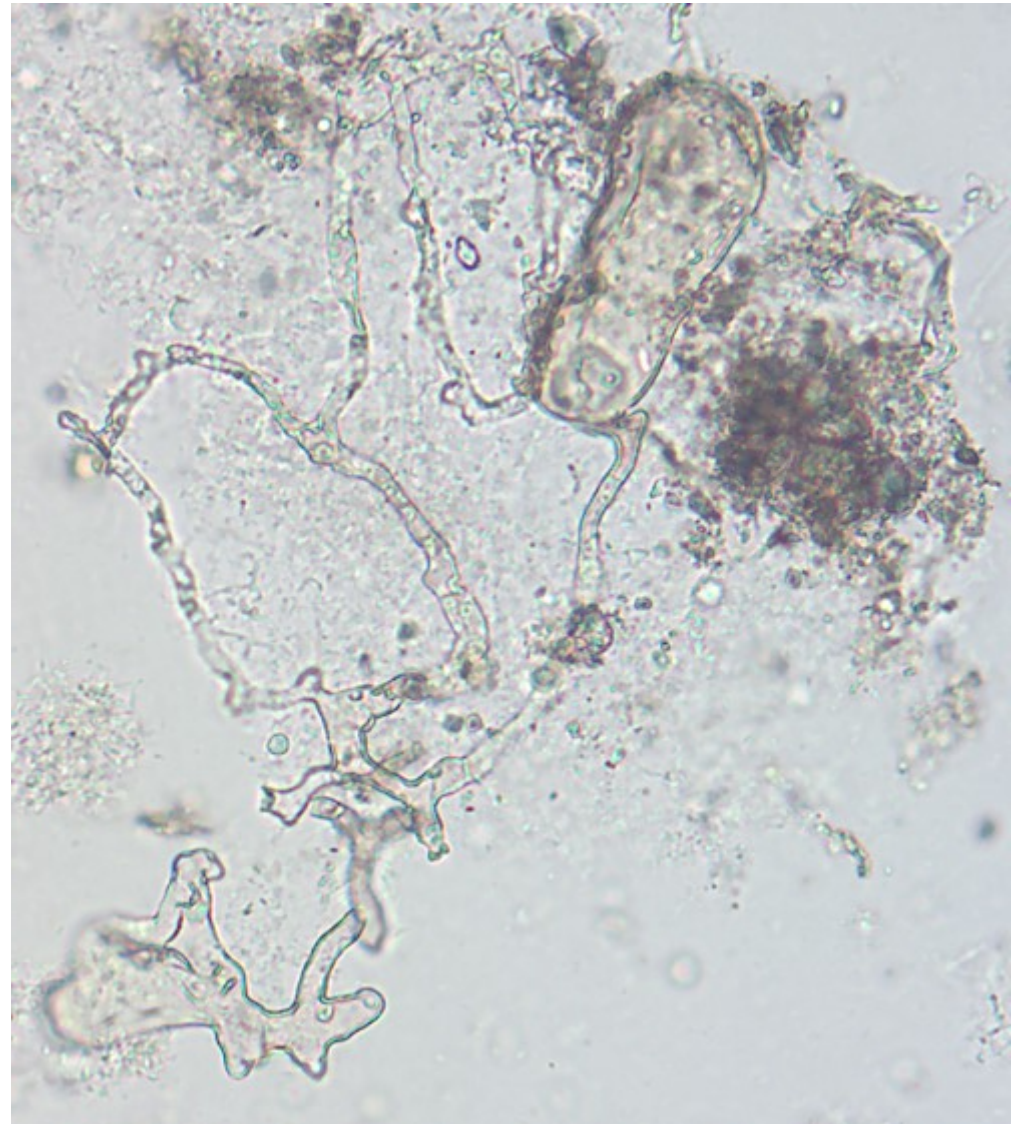

Fungus

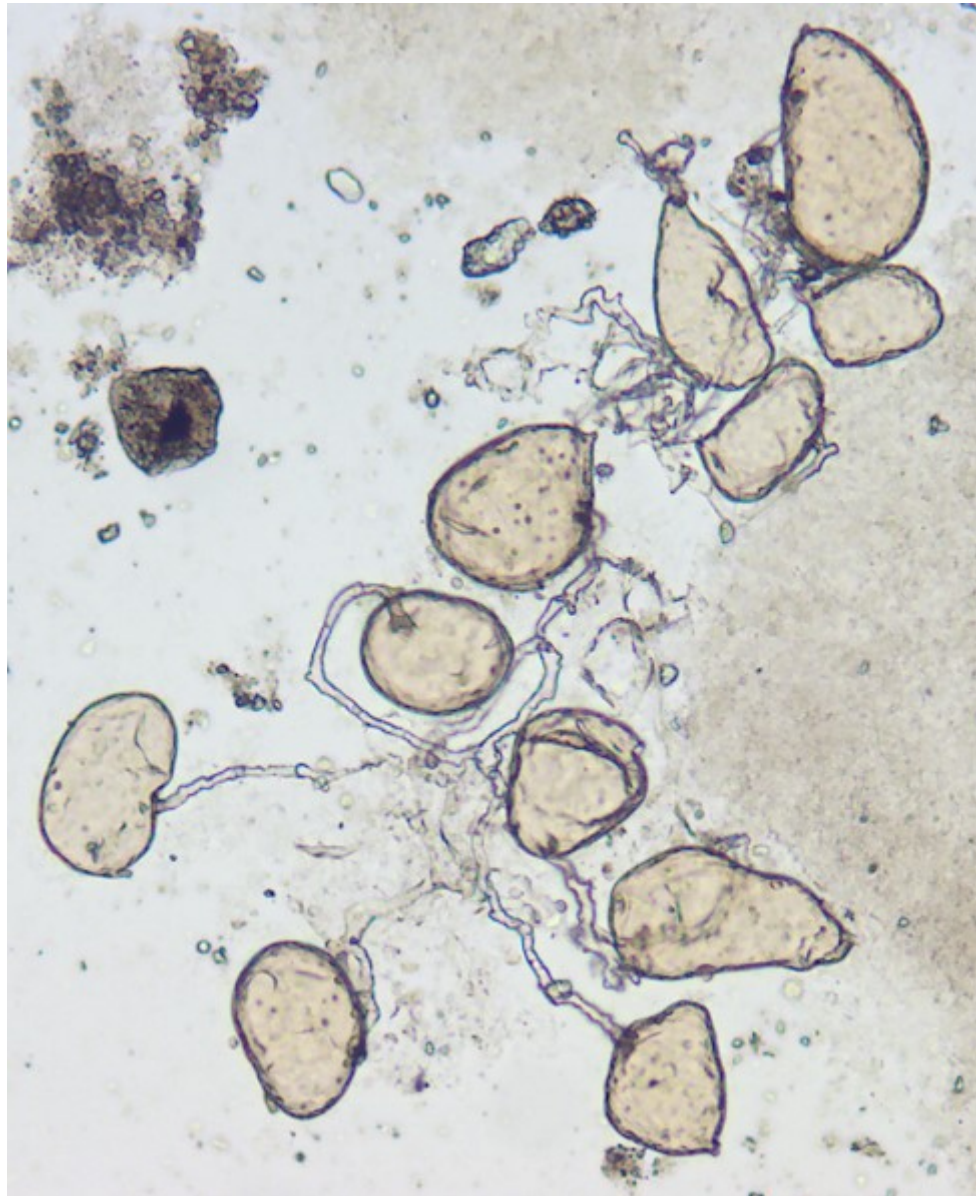

100  $\mu$ m

Kilkenny Union Workhouse (05E0435)  
Microparticle Lab # 2  
Burial CCXXXIII (36–45 years, Male)

Other unknown  
organic material  
(insect?)

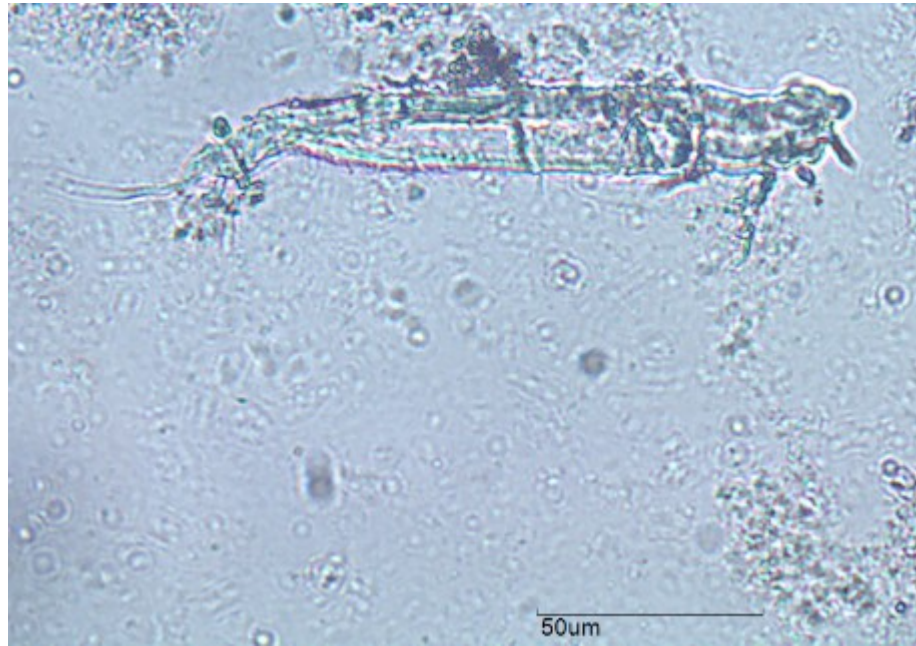

Kilkenny Union Workhouse (05E0435)  
Microparticle Lab # 3  
Burial CV (26–35 years, Female)

*Zea mays*

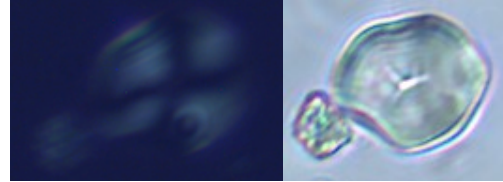

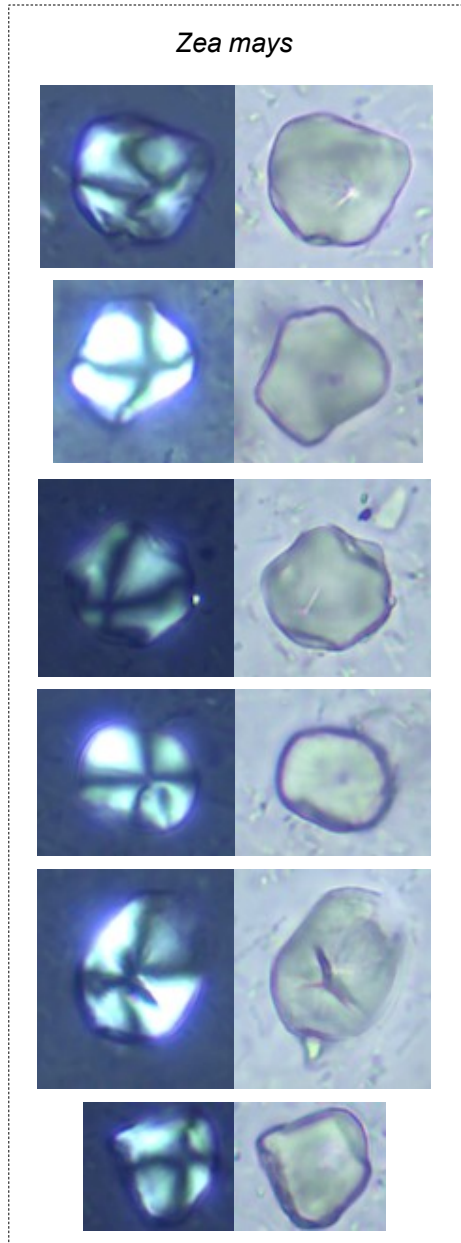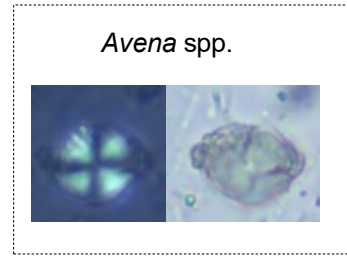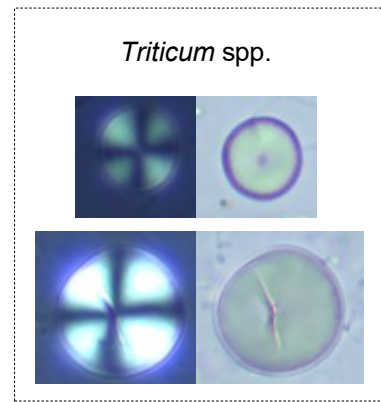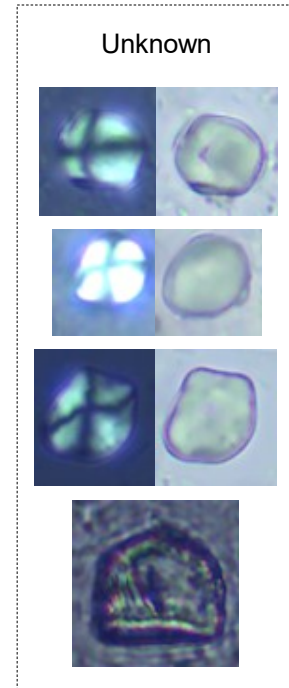

*Zea mays*

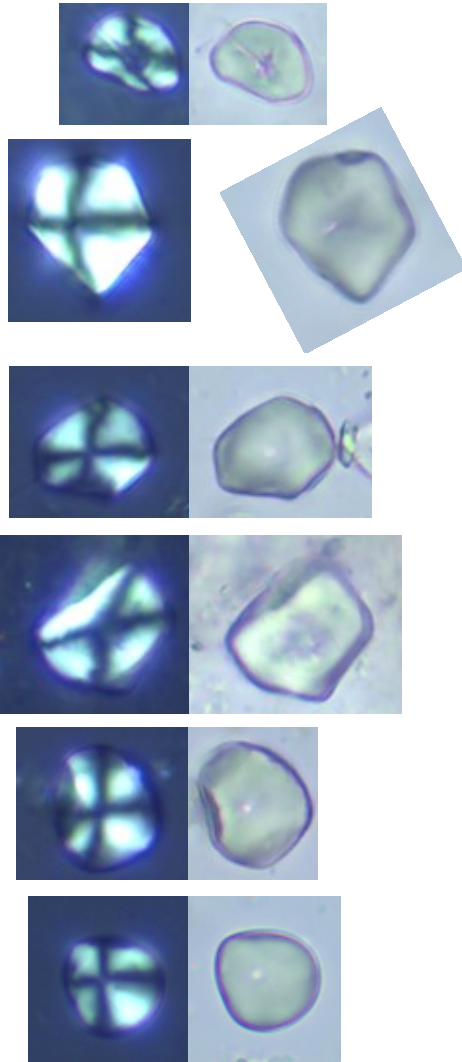

Malted *Hordeum* spp.?

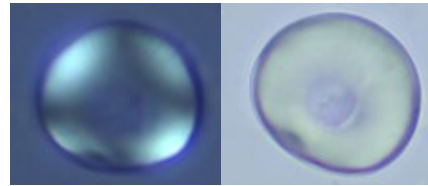

Unknown

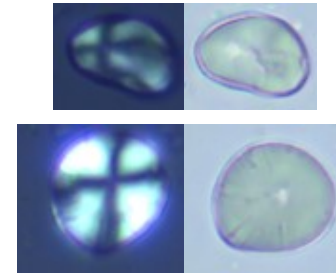

Cereal?

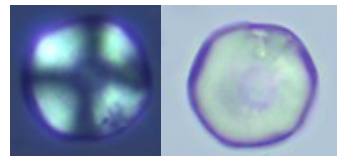

Fungus

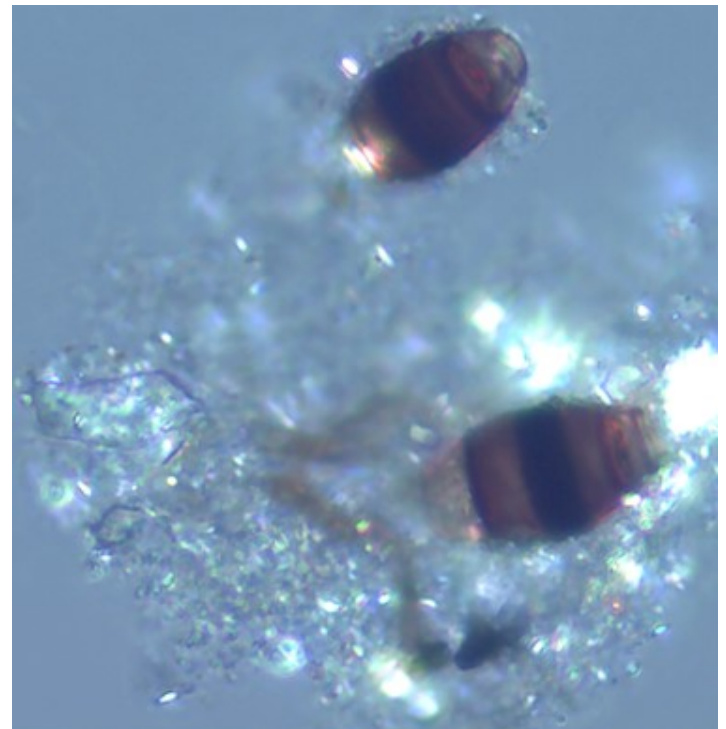



*Zea mays*

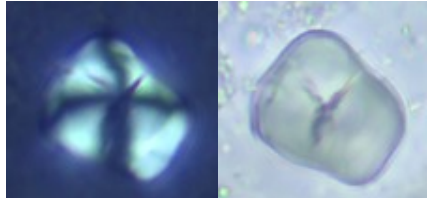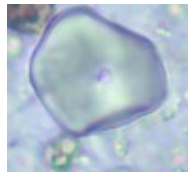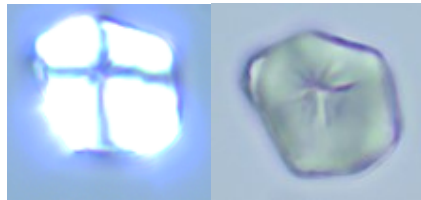

Unknown

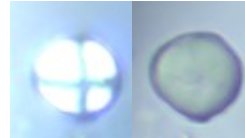

Fungus

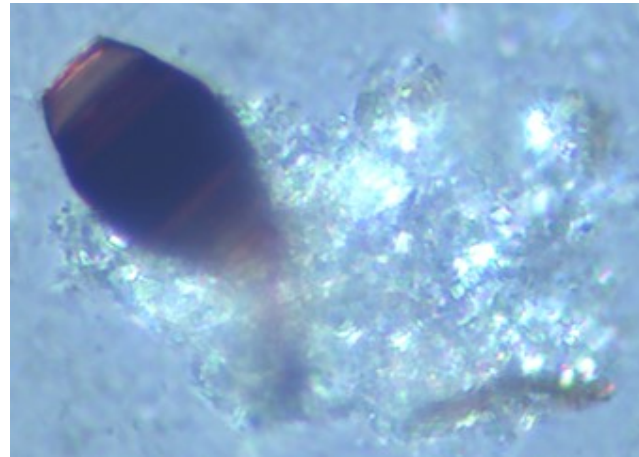

Cereal?

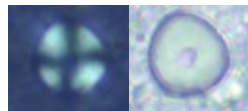

Kilkenny Union Workhouse (05E0435)  
Microparticle Lab # 7  
Burial CCLXXXII (26–35 years, Male)

Unknown

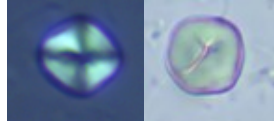

*Zea mays*

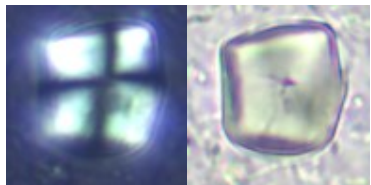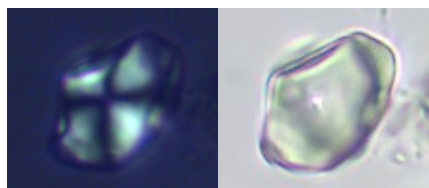

Cereal?

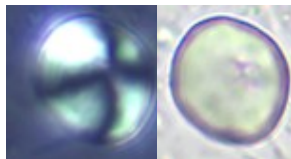

*Solanum tuberosum*

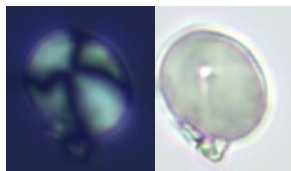

*Avena* spp.

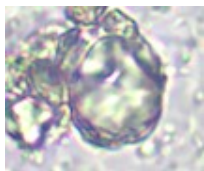

Unknown

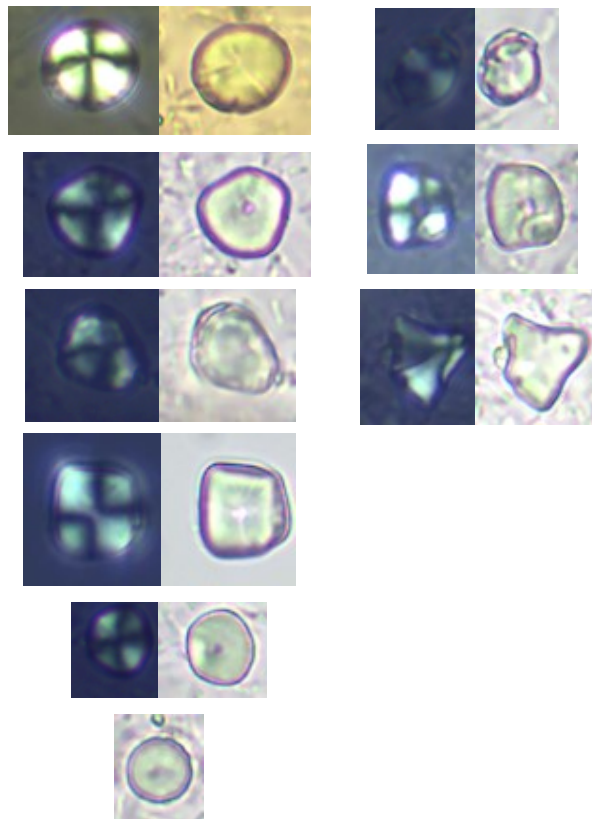

Obscured (not counted)

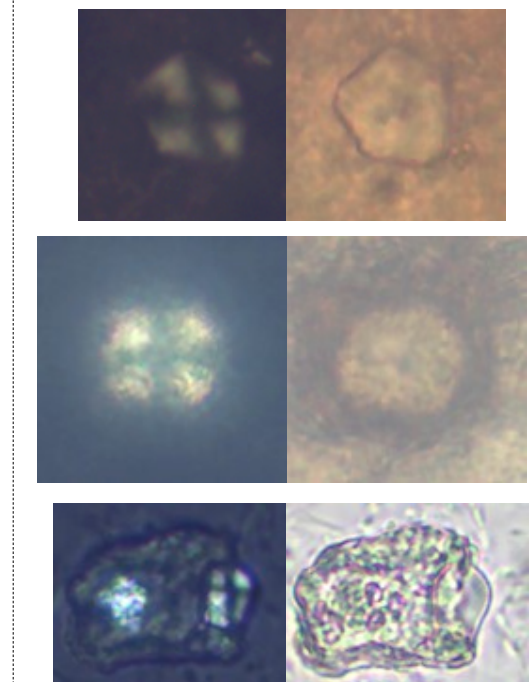

Other organic material (Entorrhiza?)

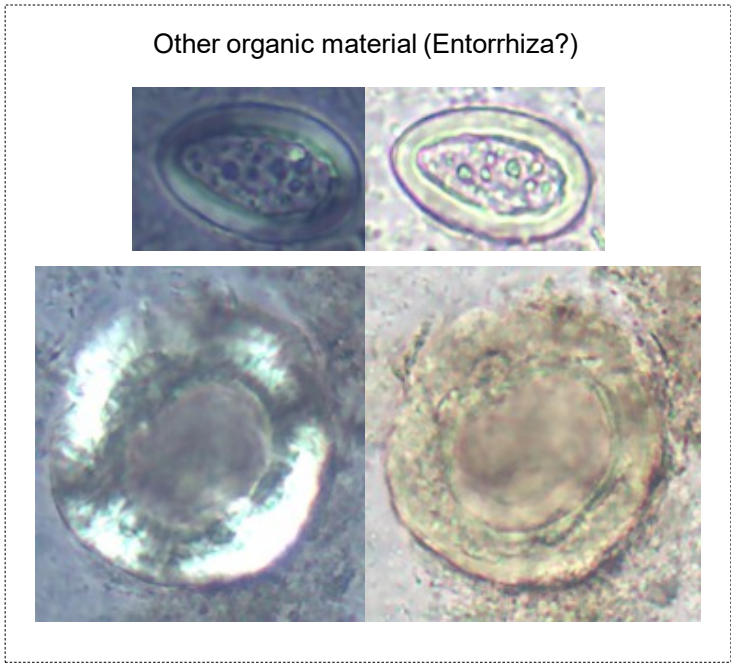

Fungus

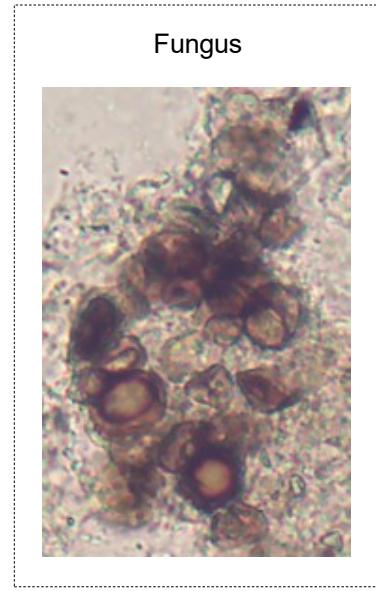

Kilkenny Union Workhouse (05E0435)  
Microparticle Lab # 8  
Burial CDXXIV (≥46 years, Male)

Chaff?

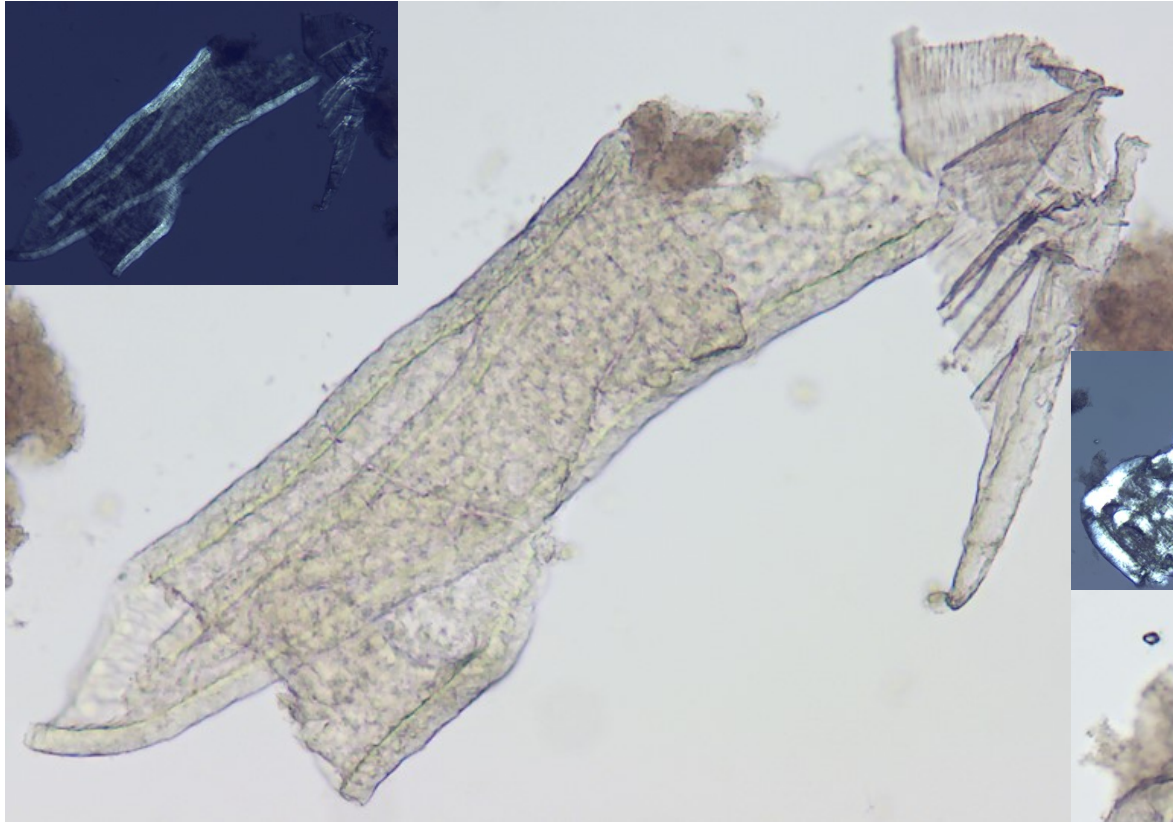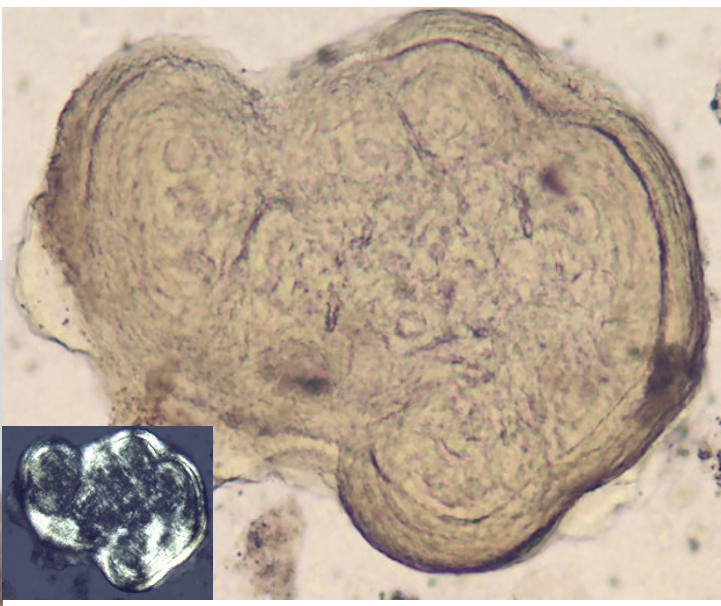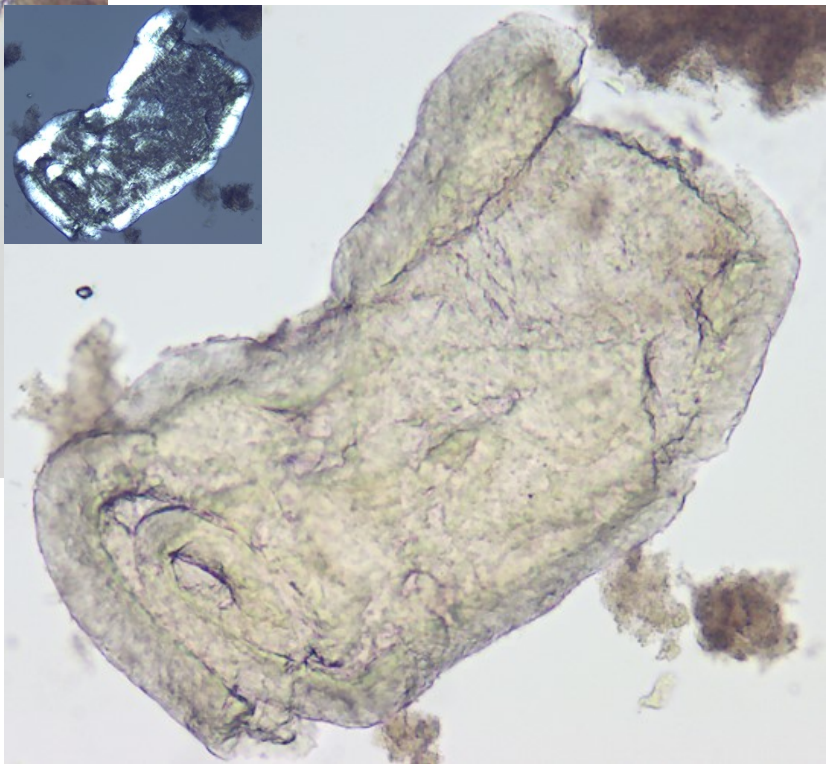

100 μm

Kilkenny Union Workhouse (05E0435)  
Microparticle Lab # 8  
Burial CDXXIV (≥46 years, Male)

Chaff?

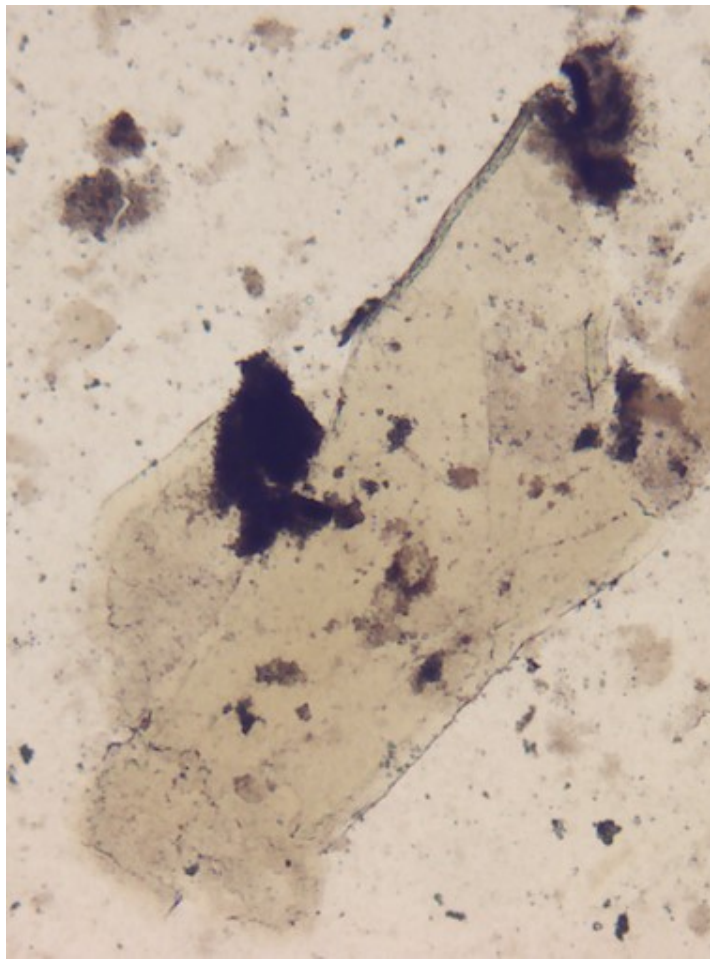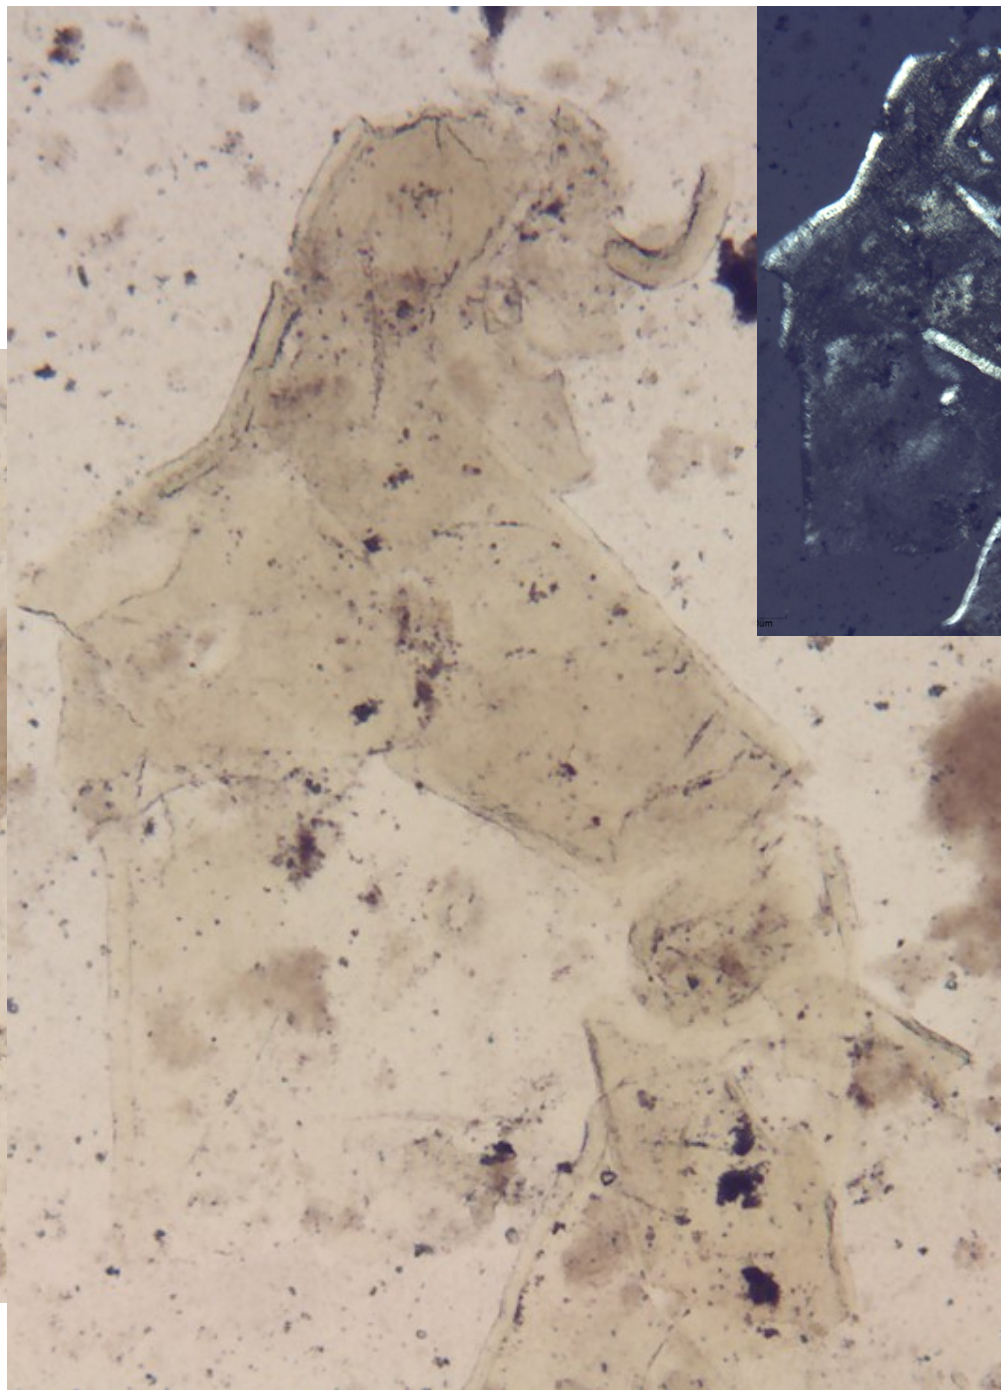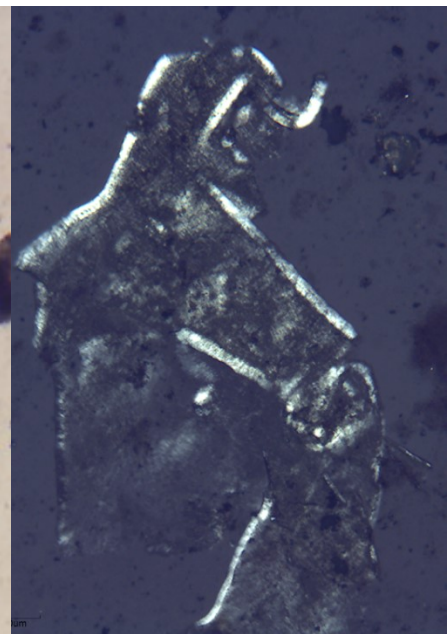

100 μm

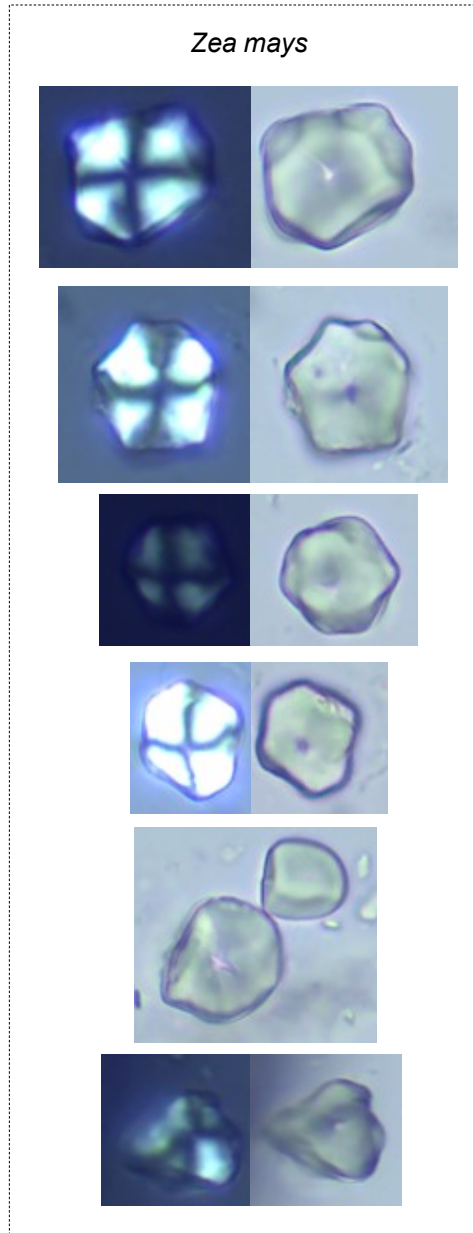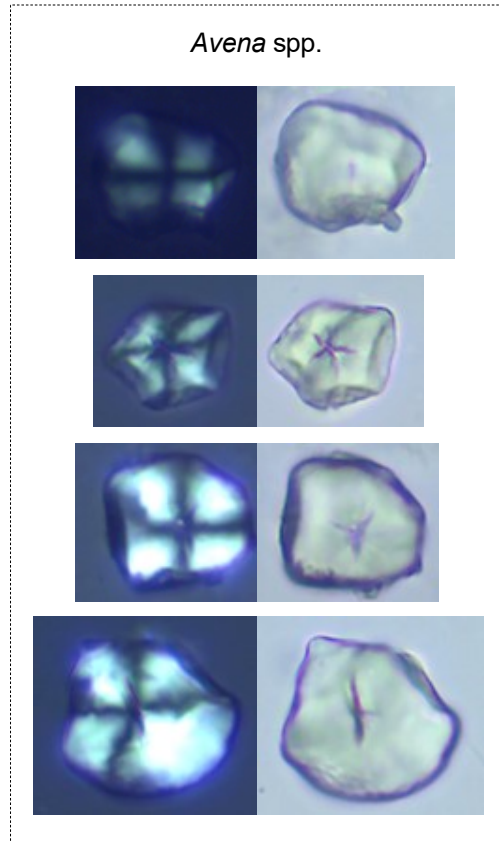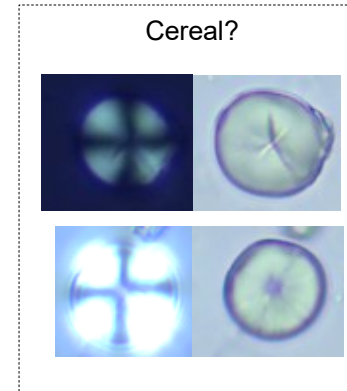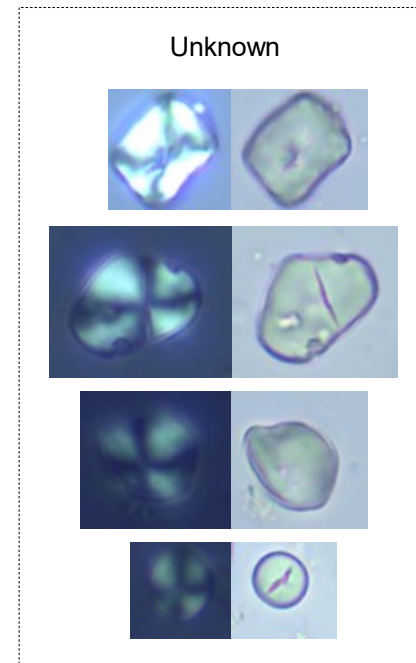

Other unknown organic material

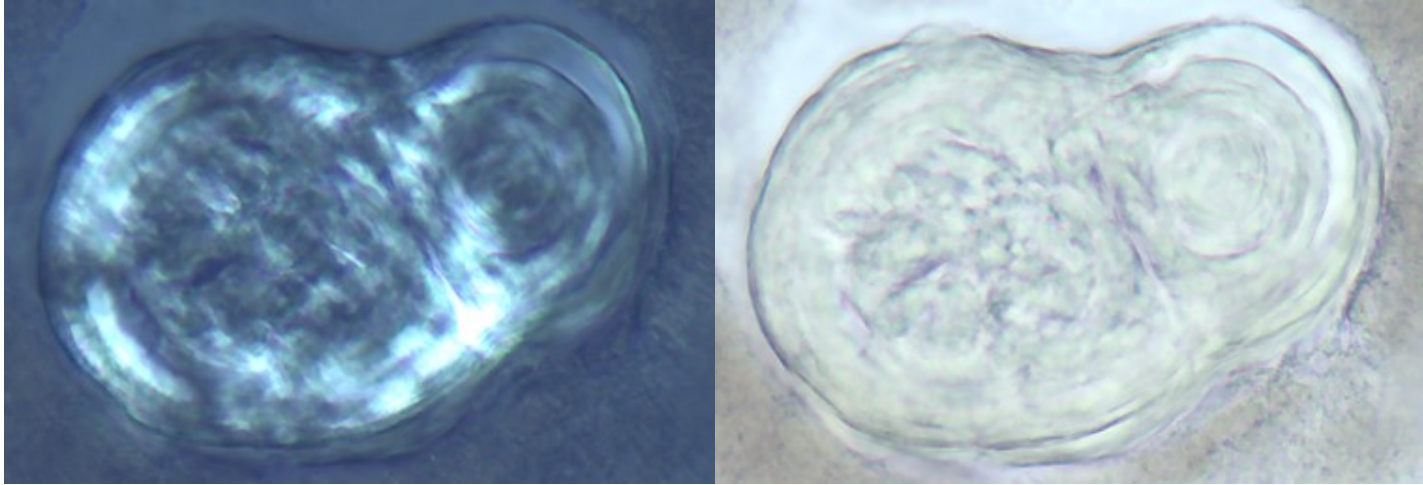



*Zea mays*

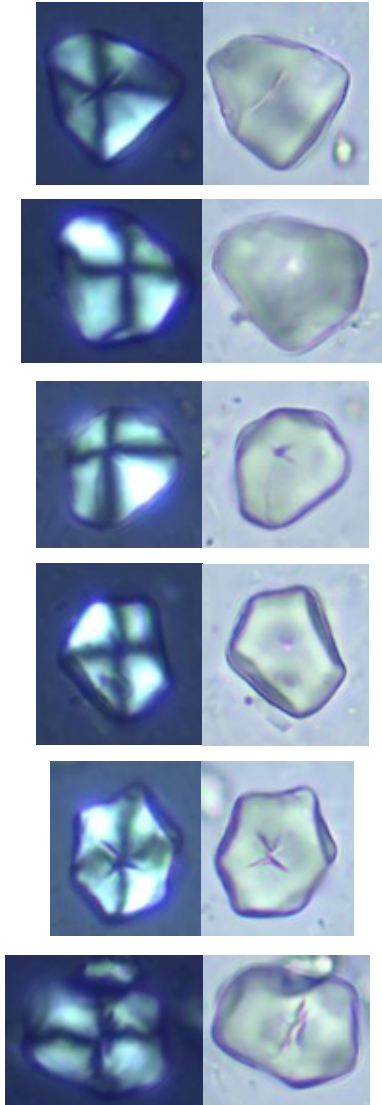

*Avena* spp.

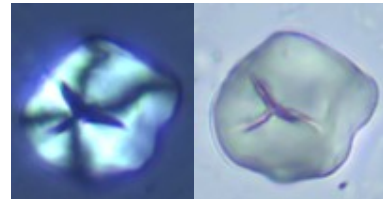

*Triticum* spp.

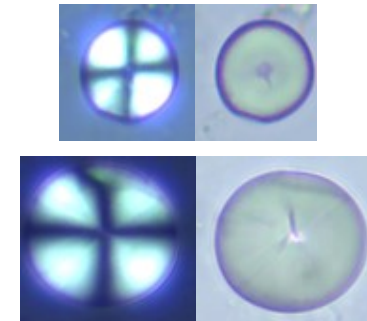

Unknown

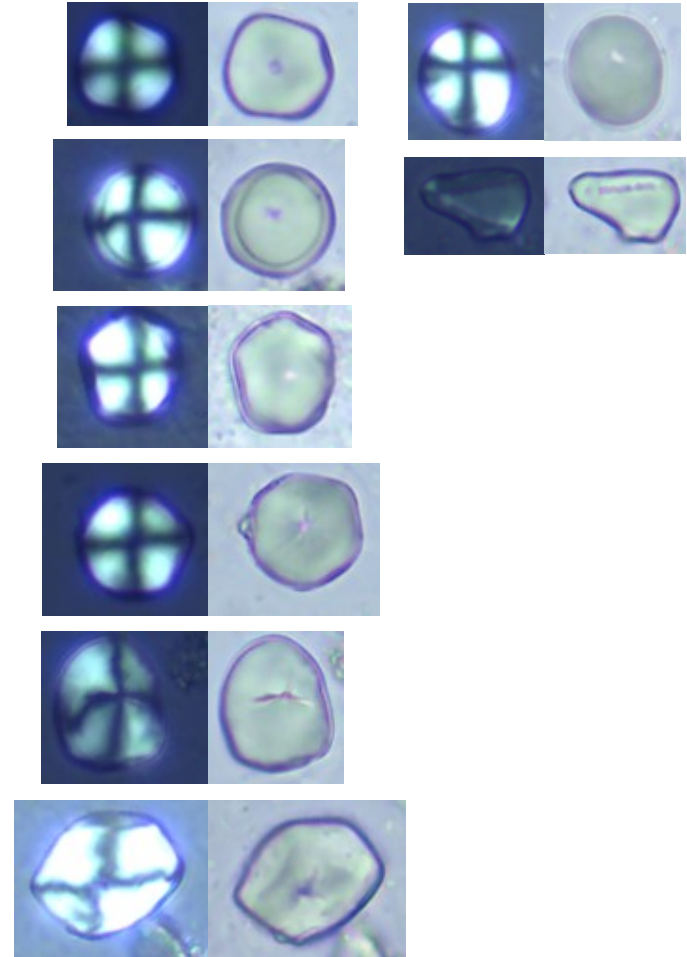

Hairs/Fibres

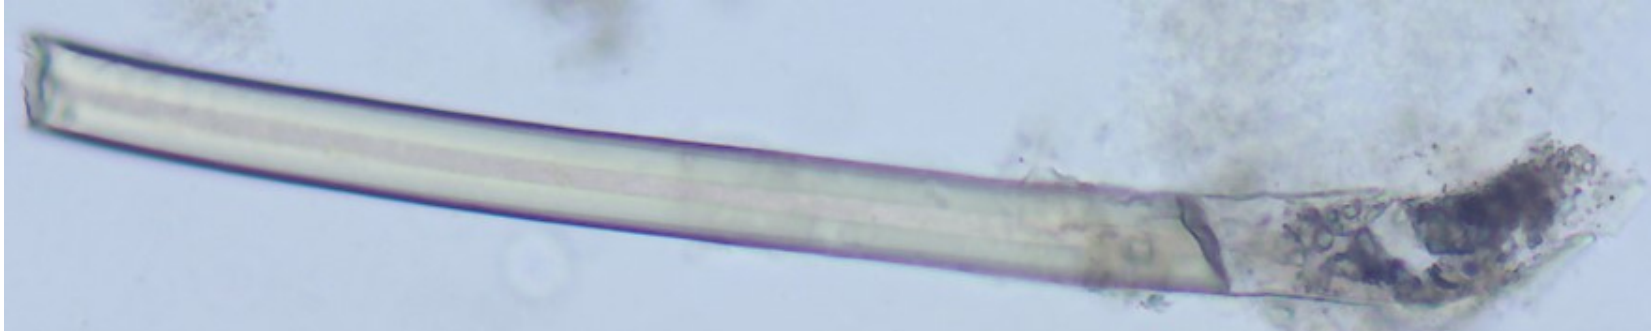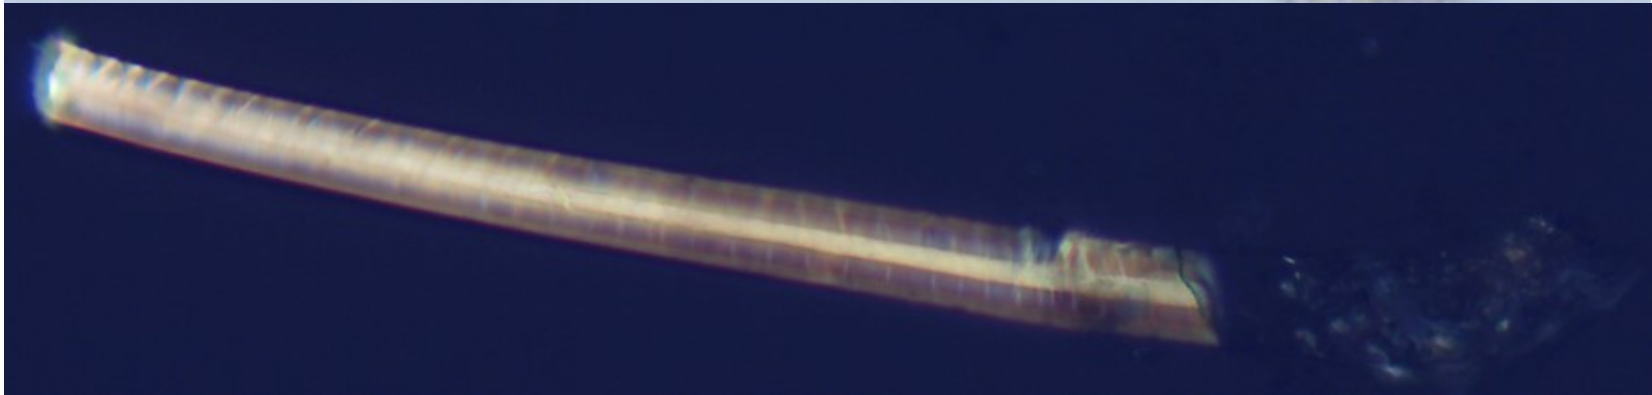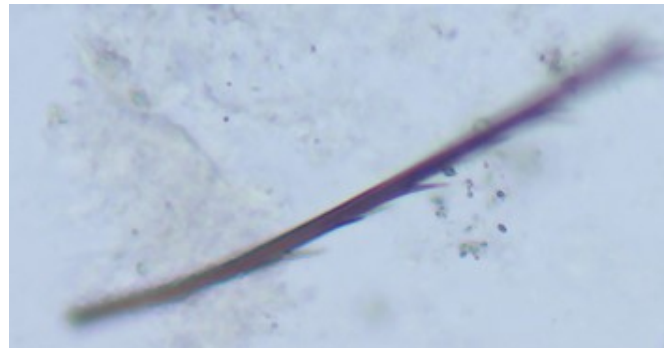

Hairs/Fibres

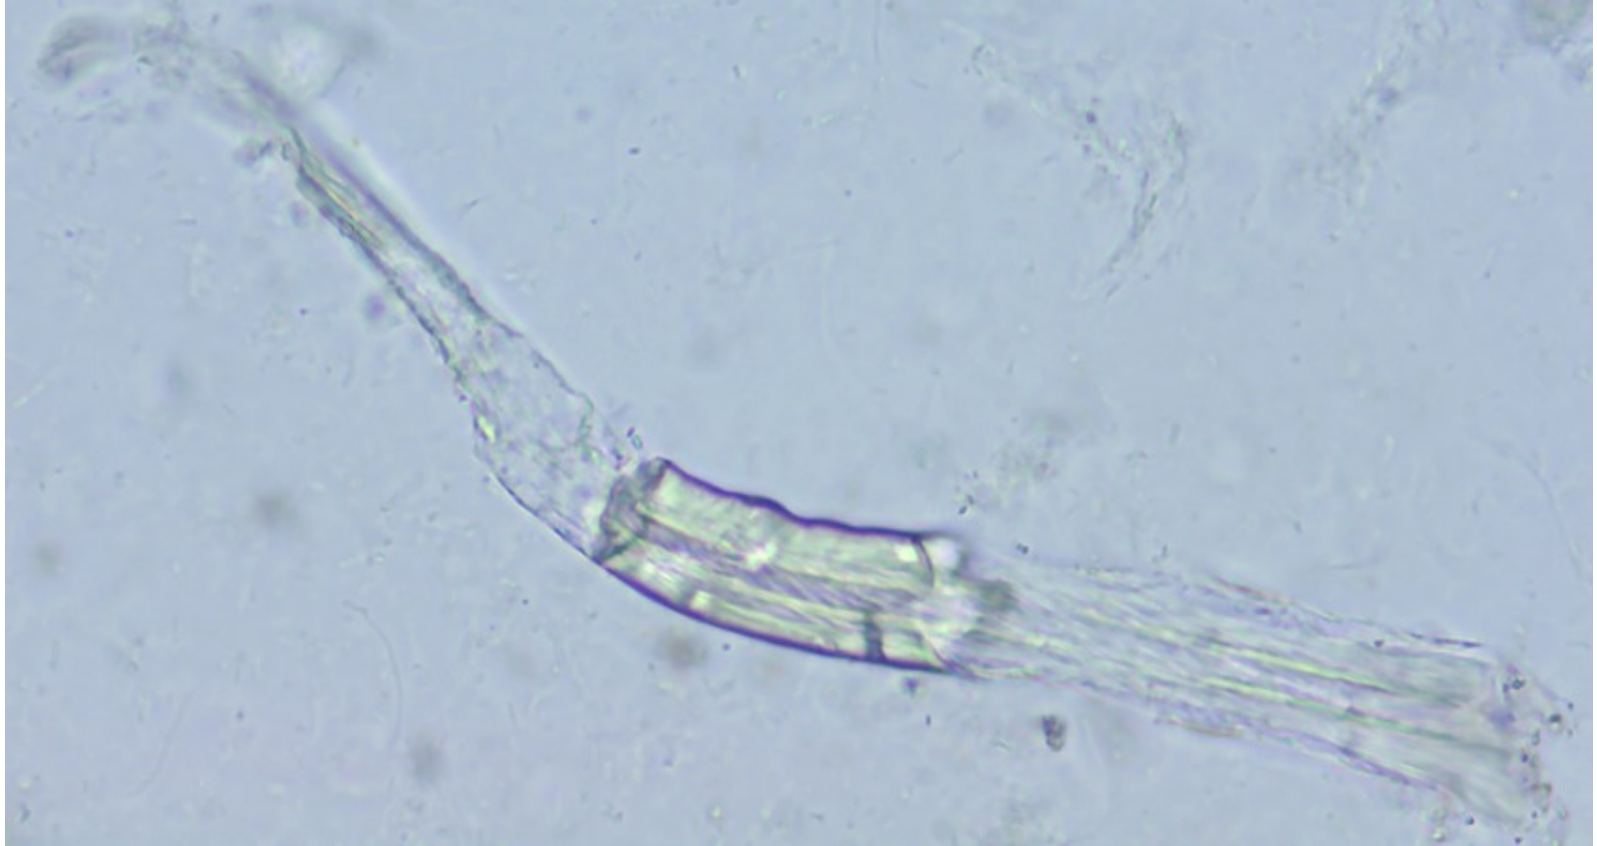

Hairs/Fibres

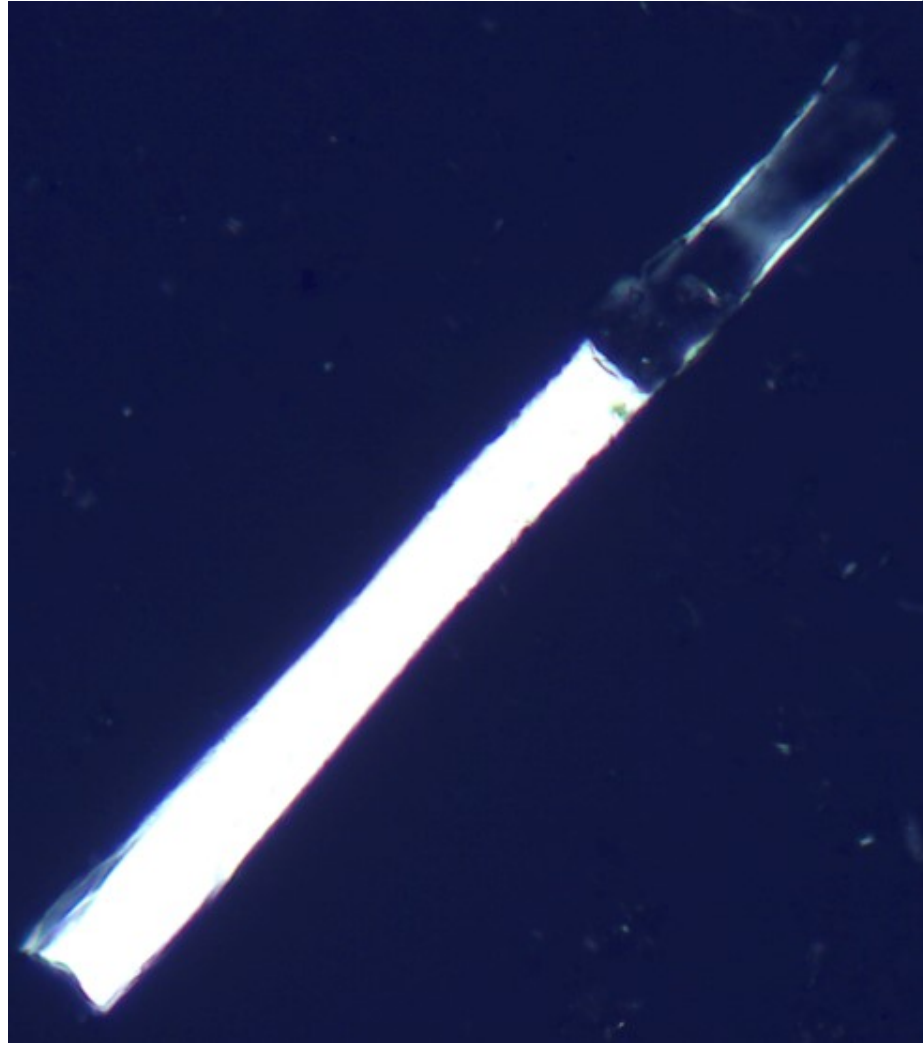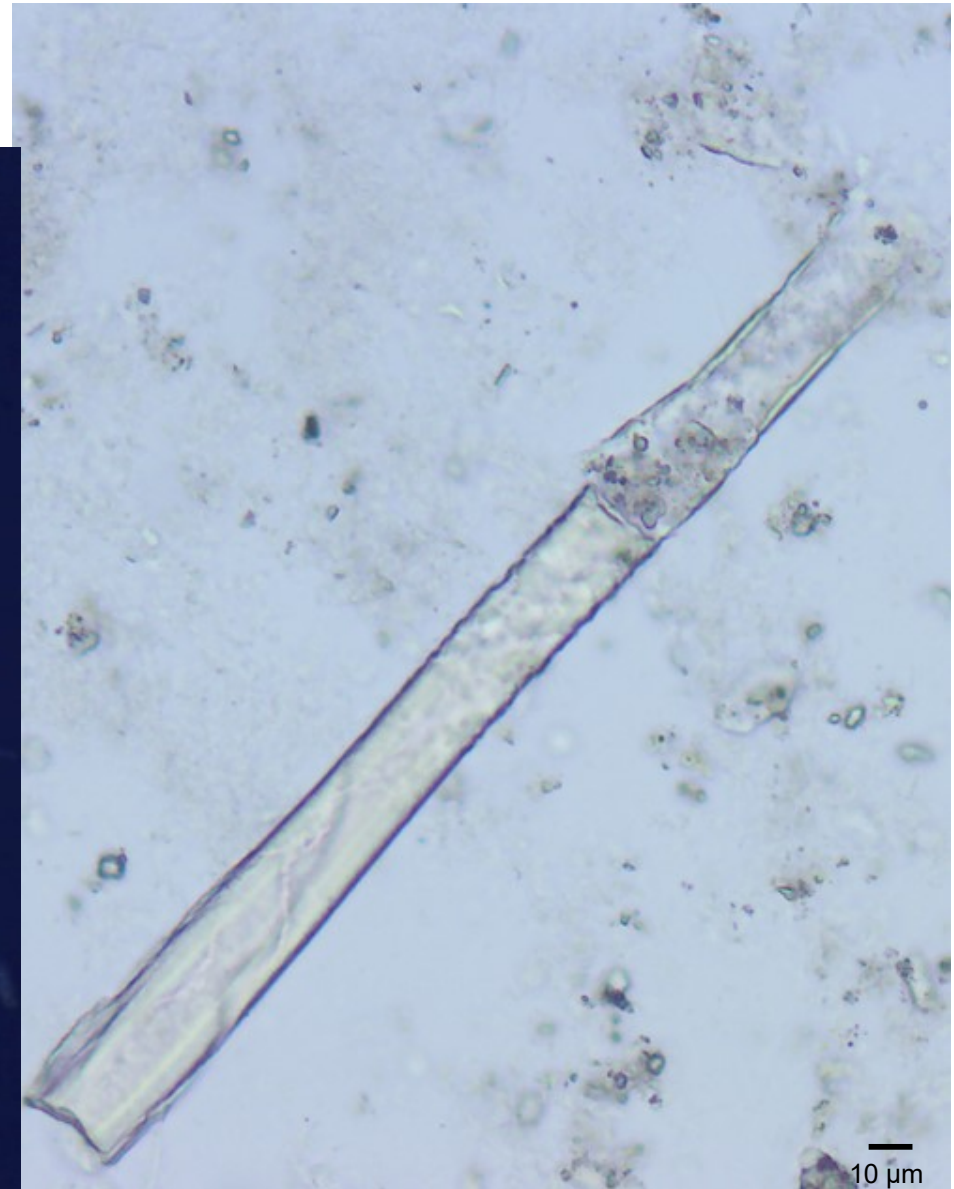

Kilkenny Union Workhouse (05E0435)  
Microparticle Lab # 11  
Burial CCLV (36–45 years, Female)

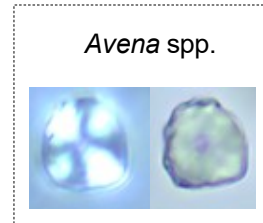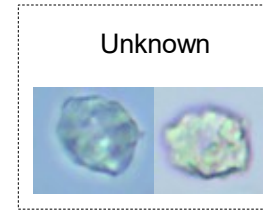

*Zea mays*

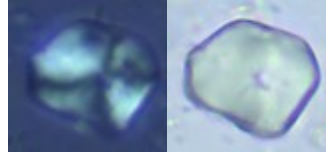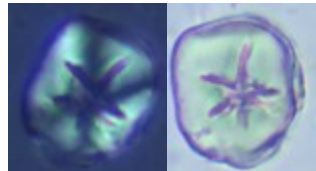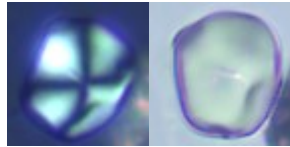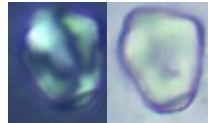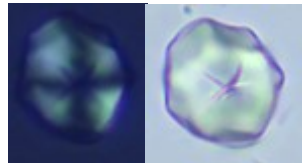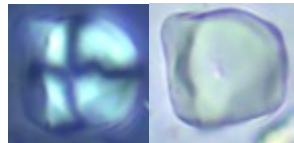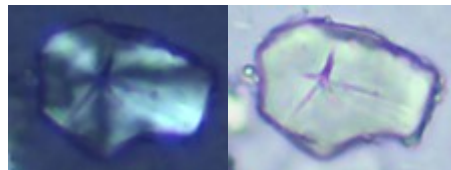

*Avena spp.*

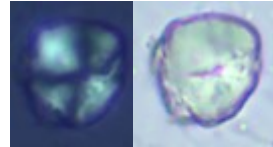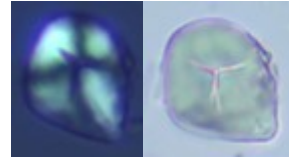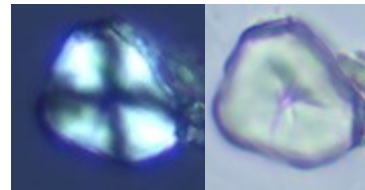

*Triticum spp.*

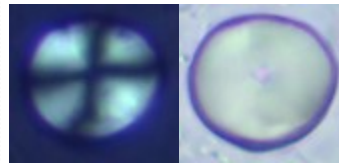

Unknown

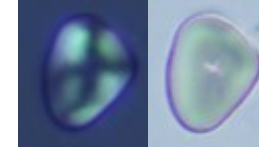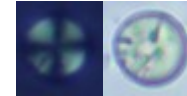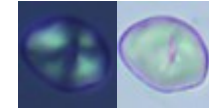

Kilkenny Union Workhouse (05E0435)  
Microparticle Lab # 12  
Burial DCXCIII (18–25 years, Female)

Other unknown organic material

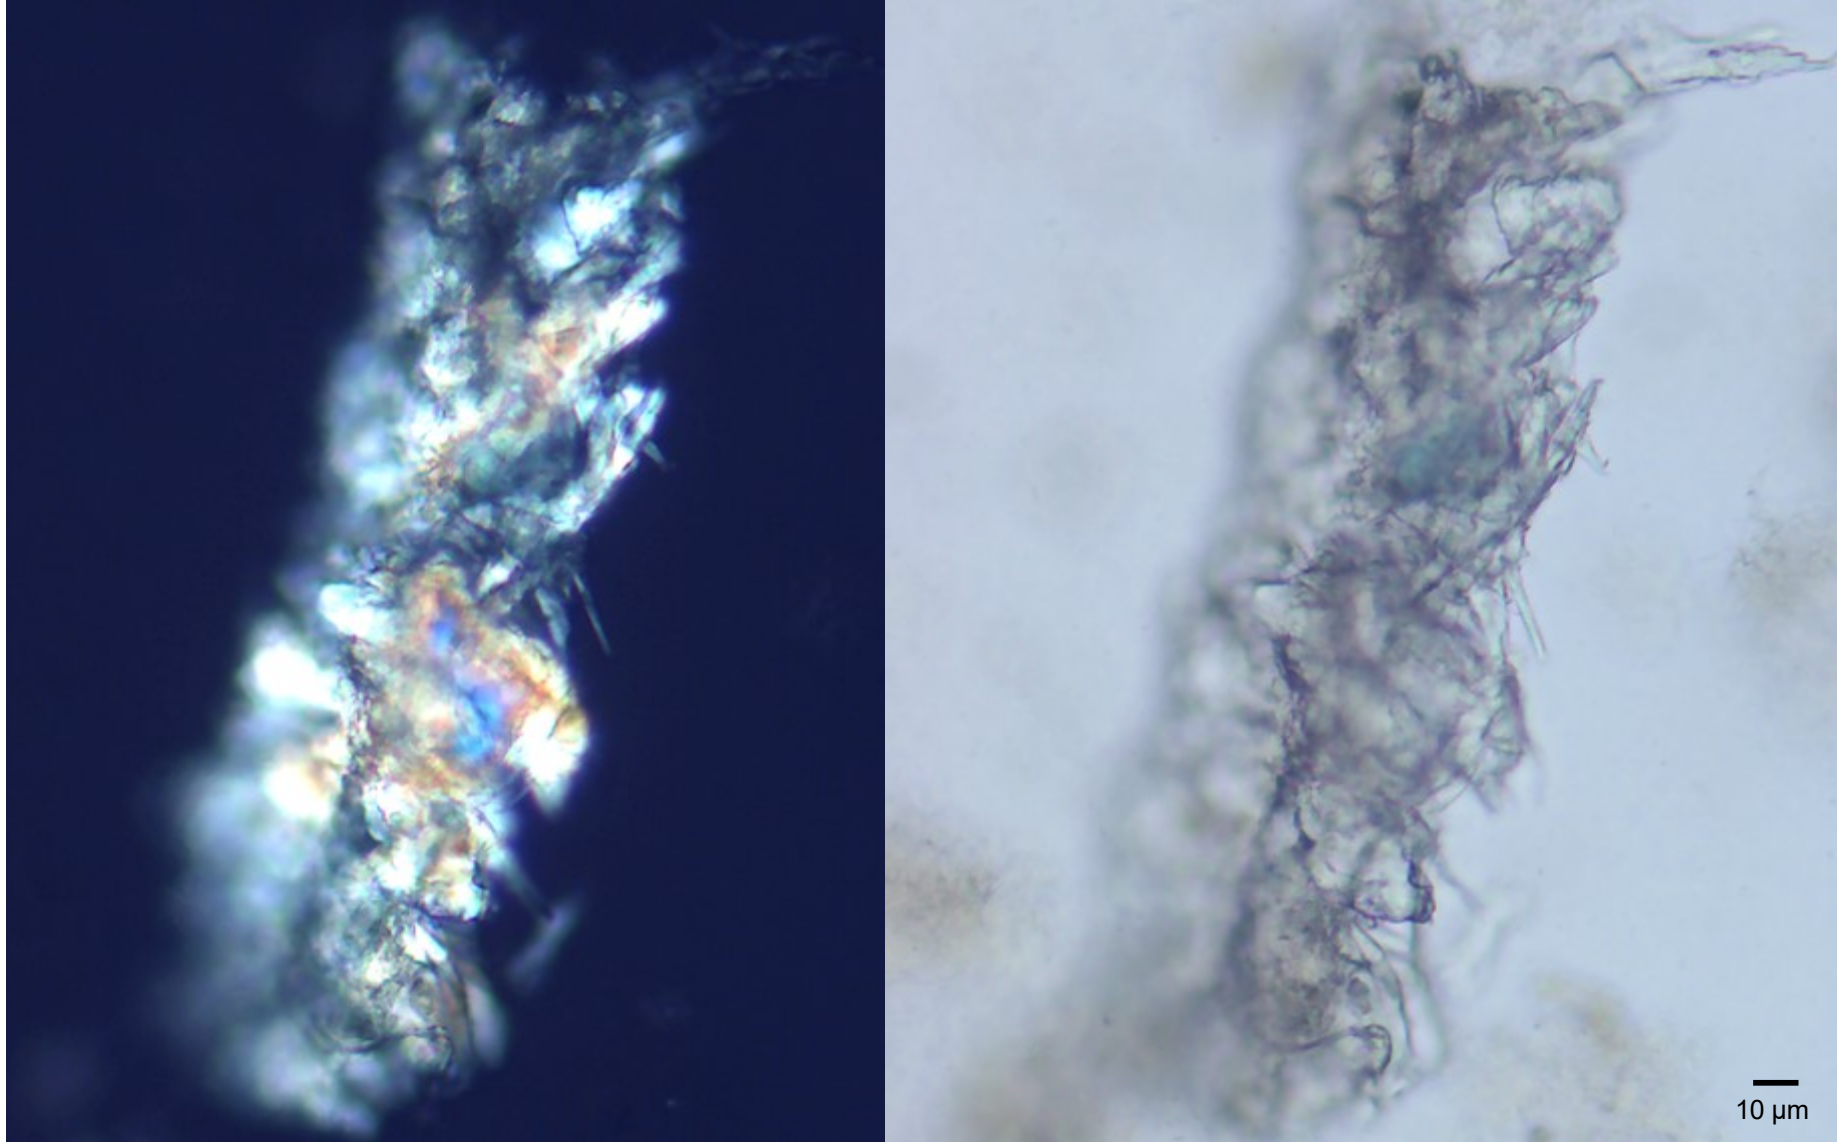

Kilkenny Union Workhouse (05E0435)  
Microparticle Lab # 12  
Burial DCXCIII (18–25 years, Female)

Other unknown  
organic material

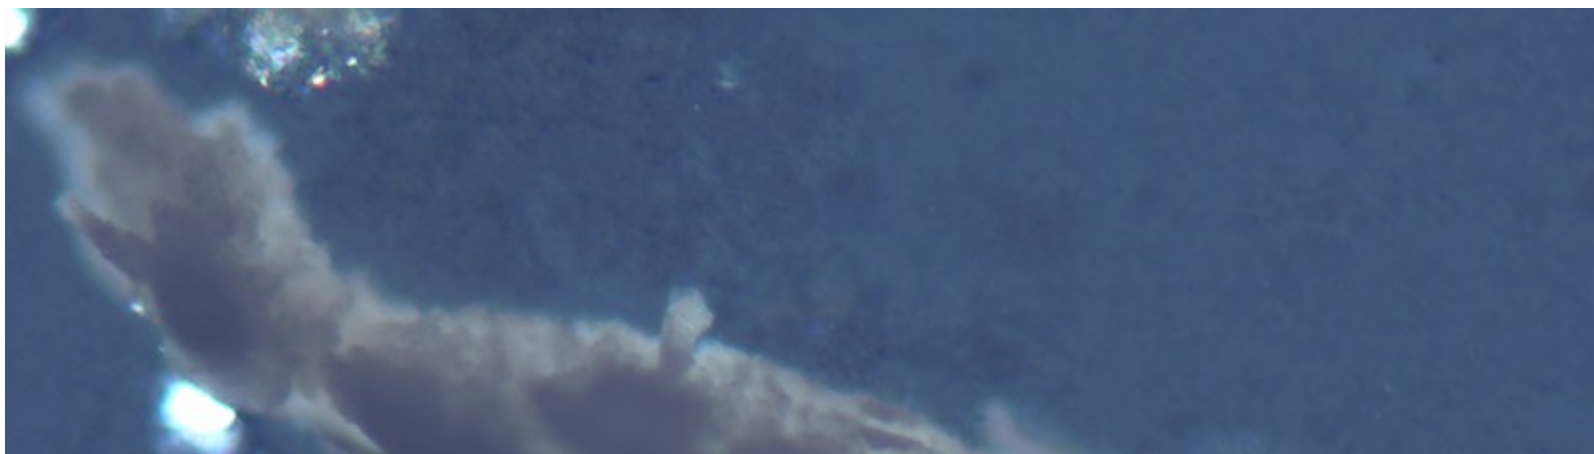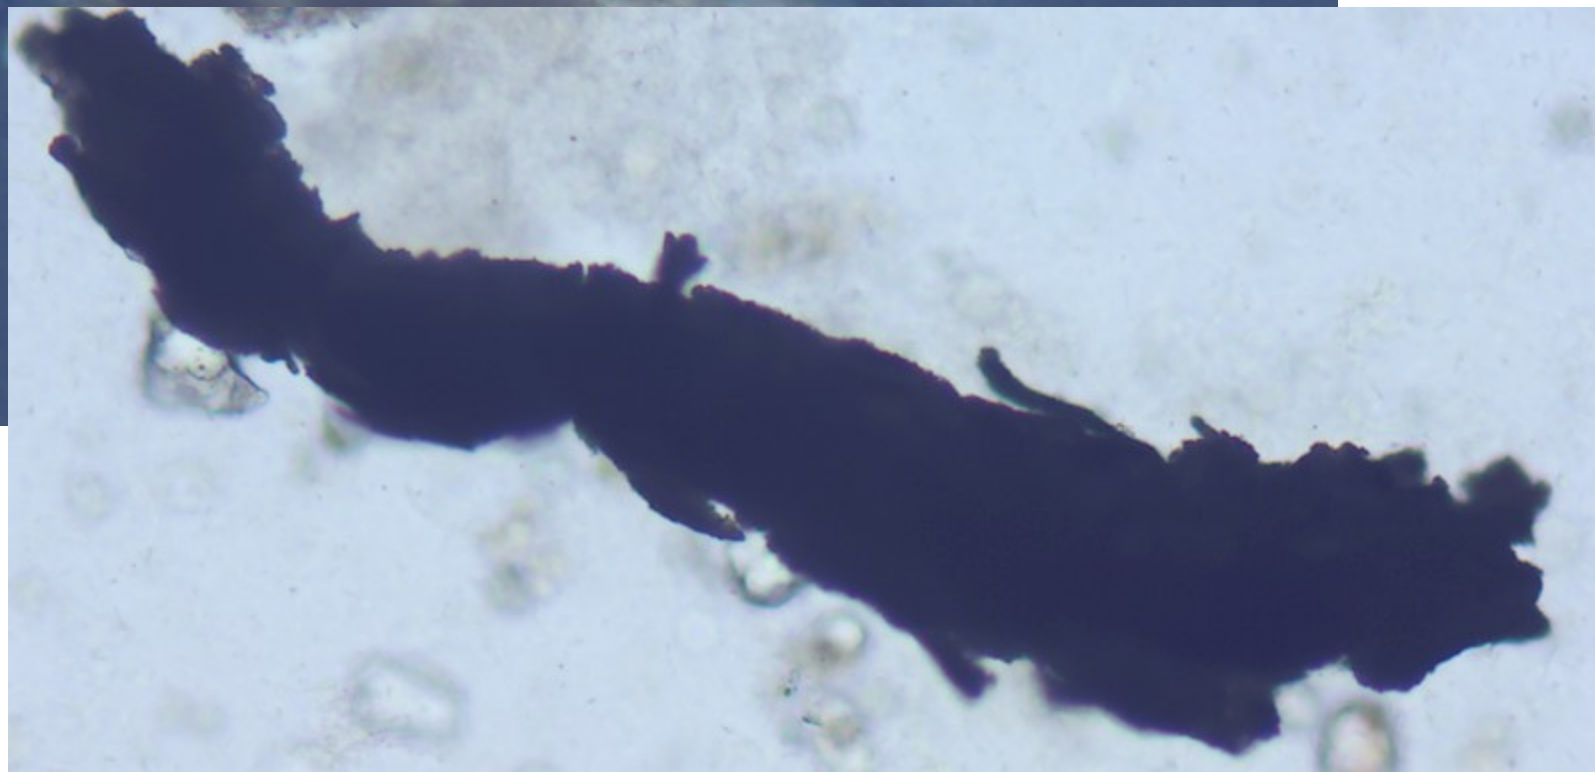

10  $\mu$ m



*Zea mays*

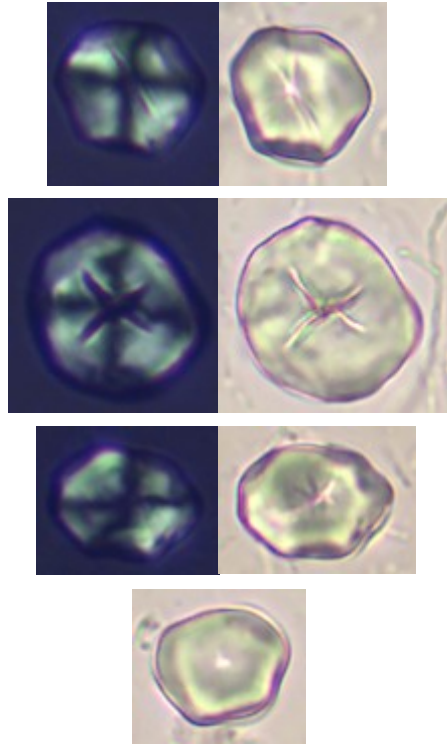

*Avena* spp.

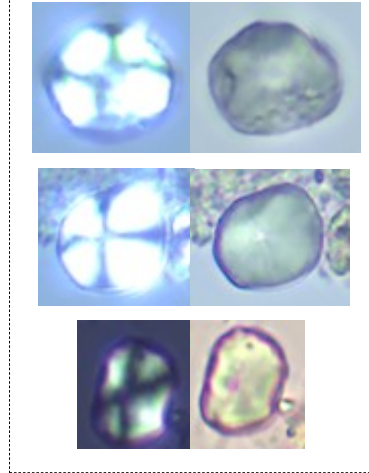

Unknown

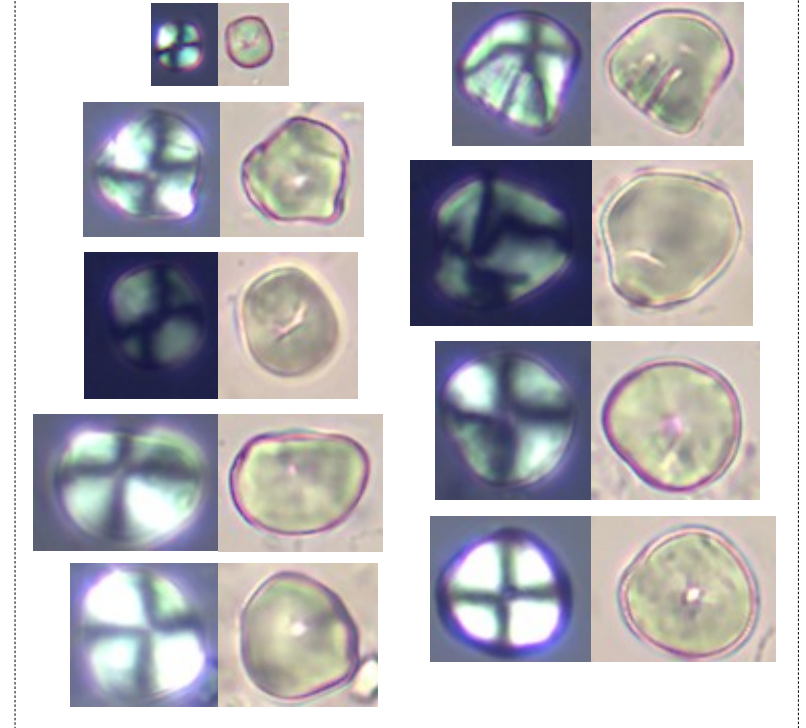

Chaff?/Insect?

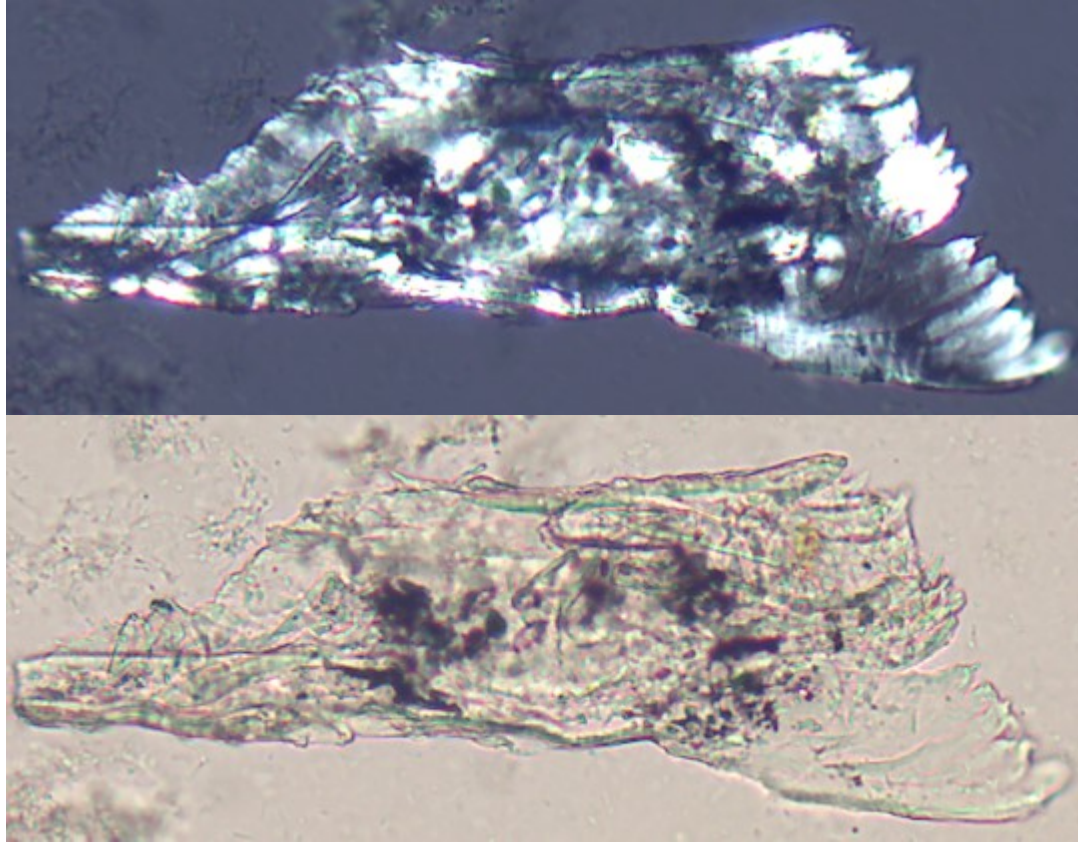

*Zea mays*

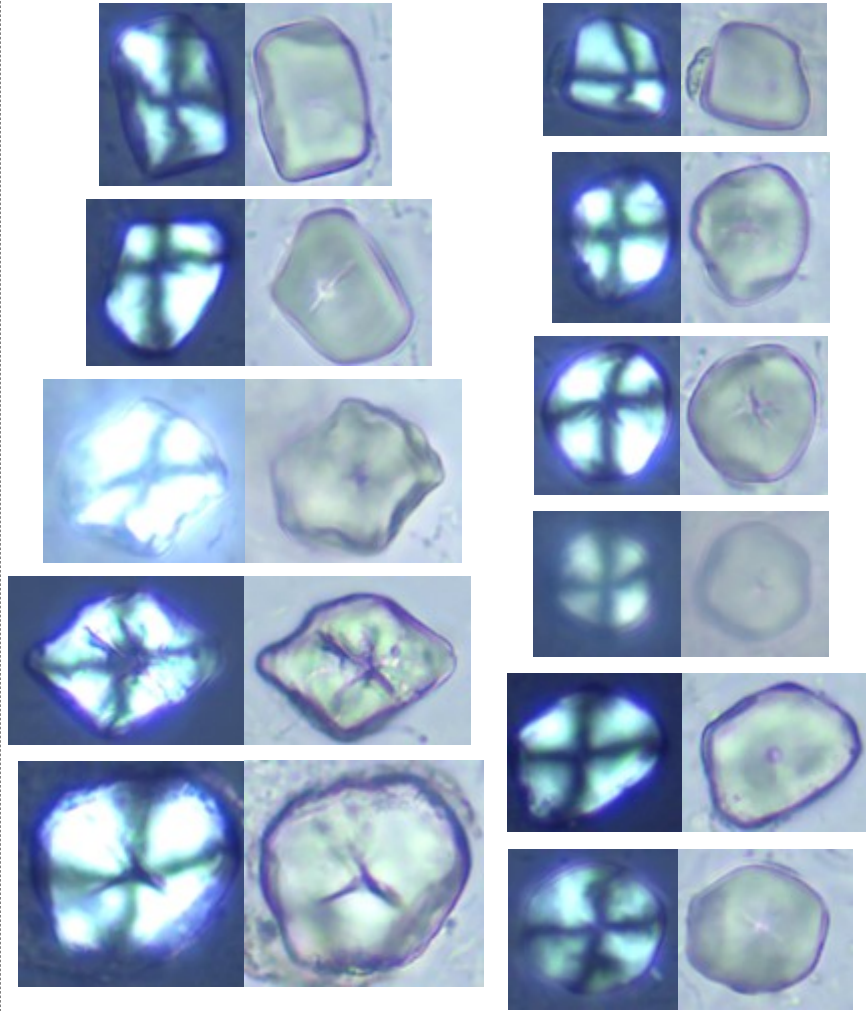

*Triticum* spp.

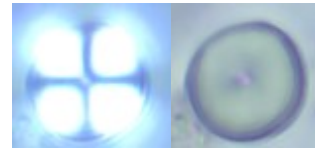

Malted *Hordeum* spp.?

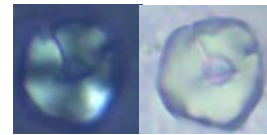

*Avena* spp.

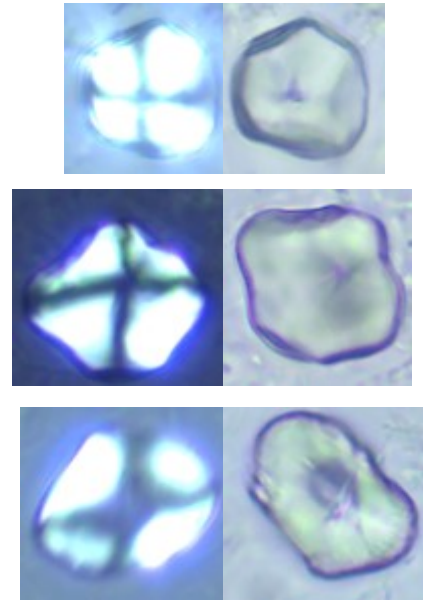

Unknown

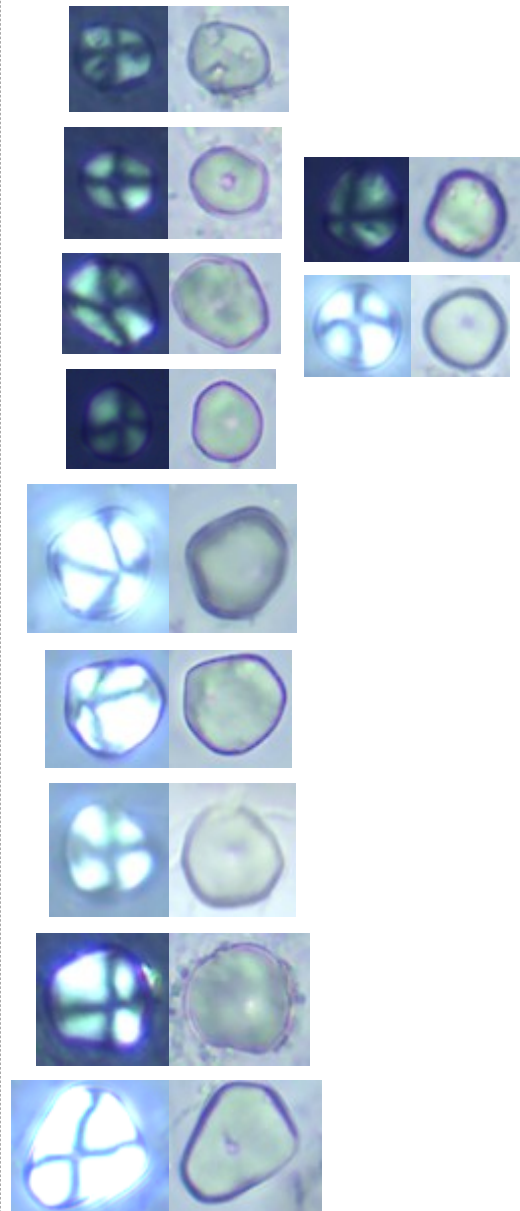

Obscured (not counted)

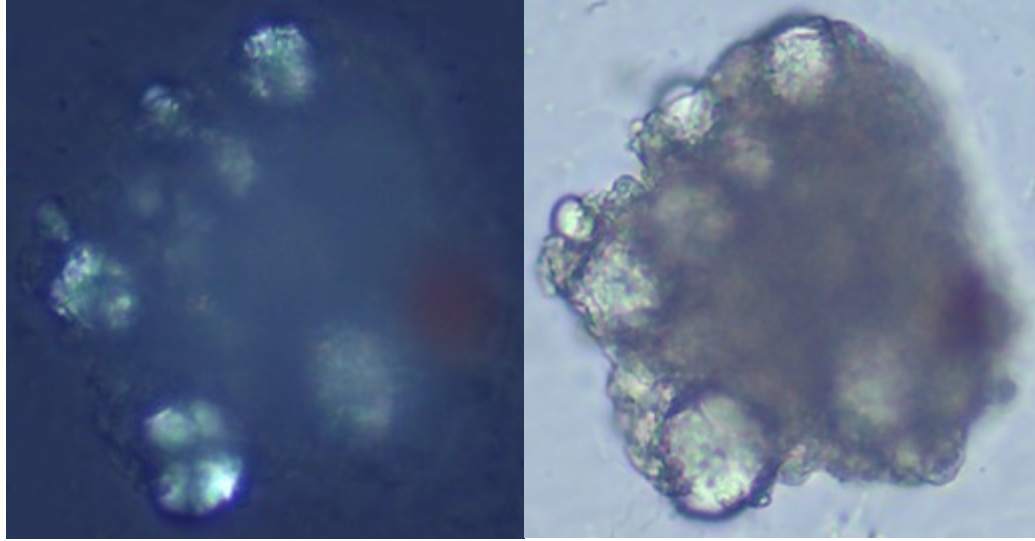

Chaff?

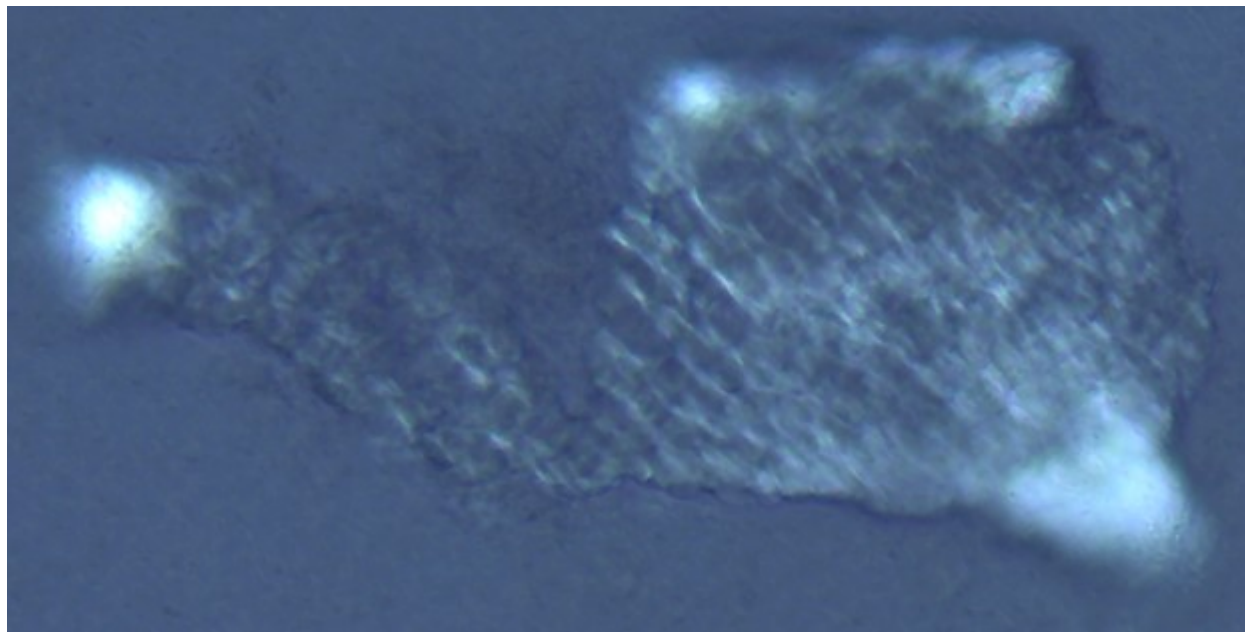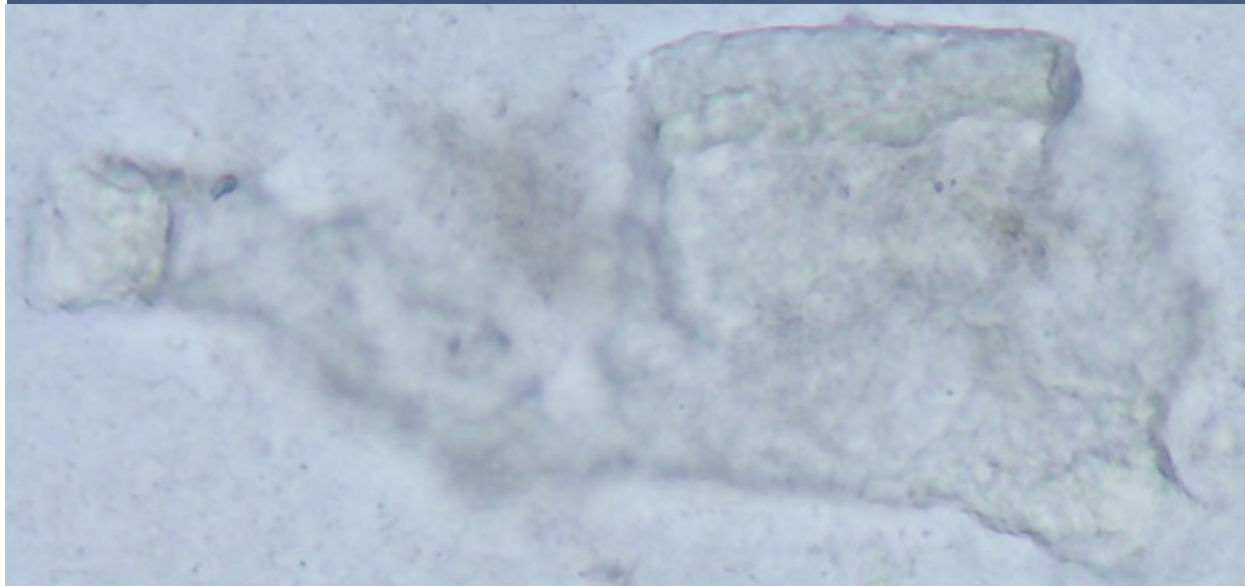

Chaff?

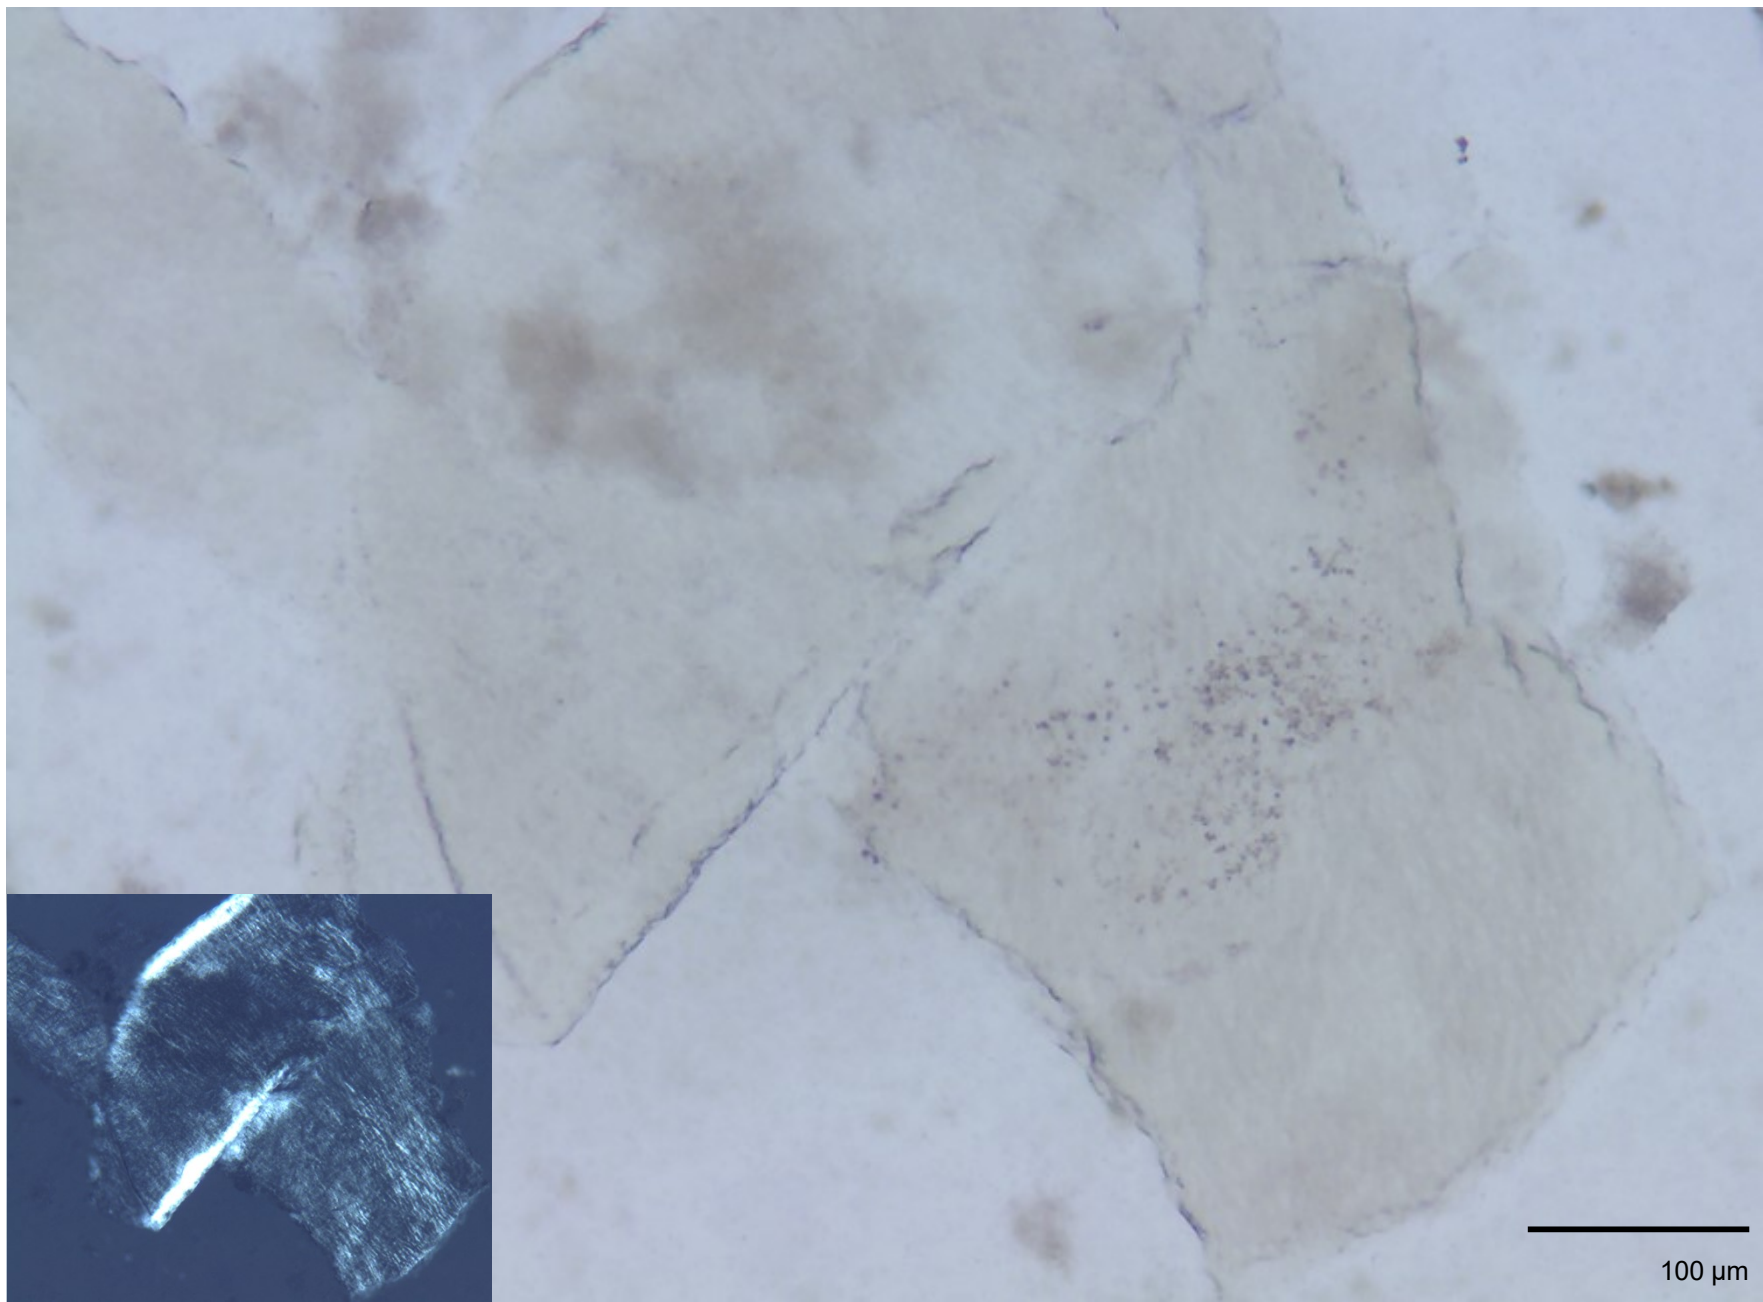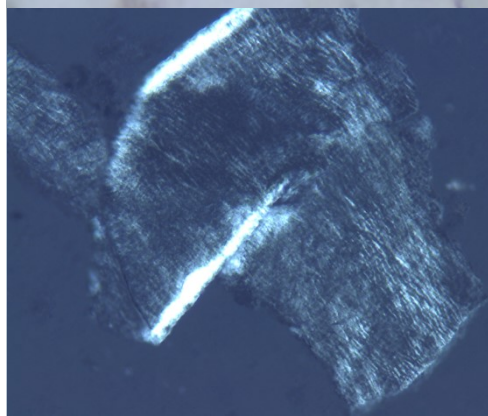

100 μm

Chaff?

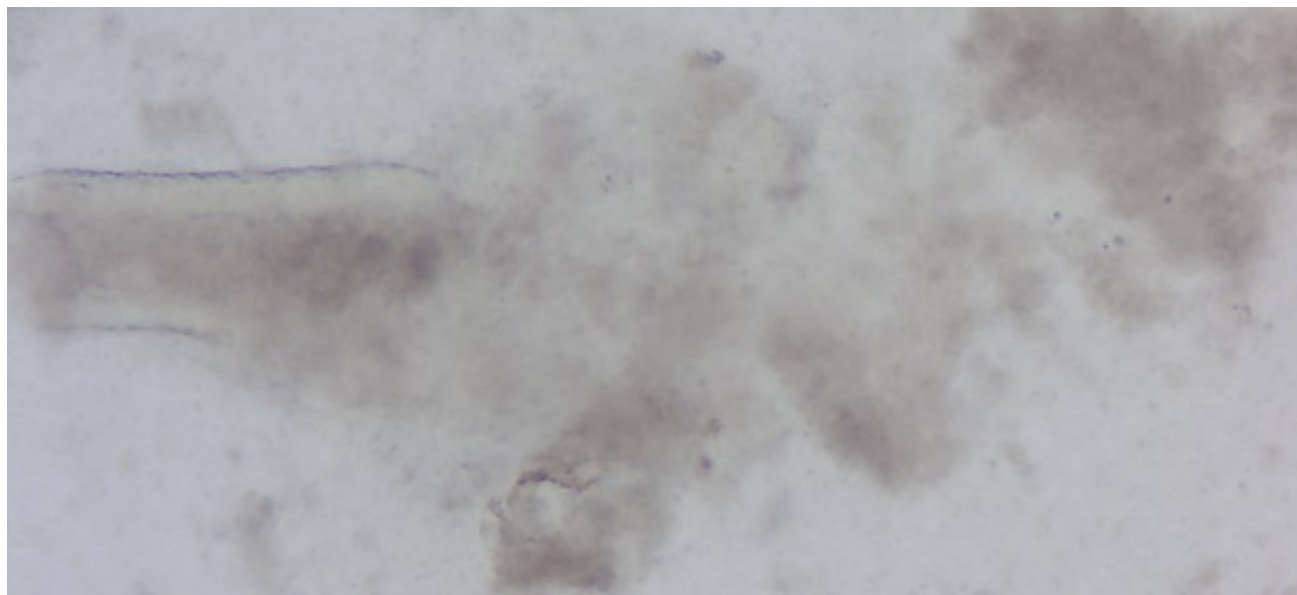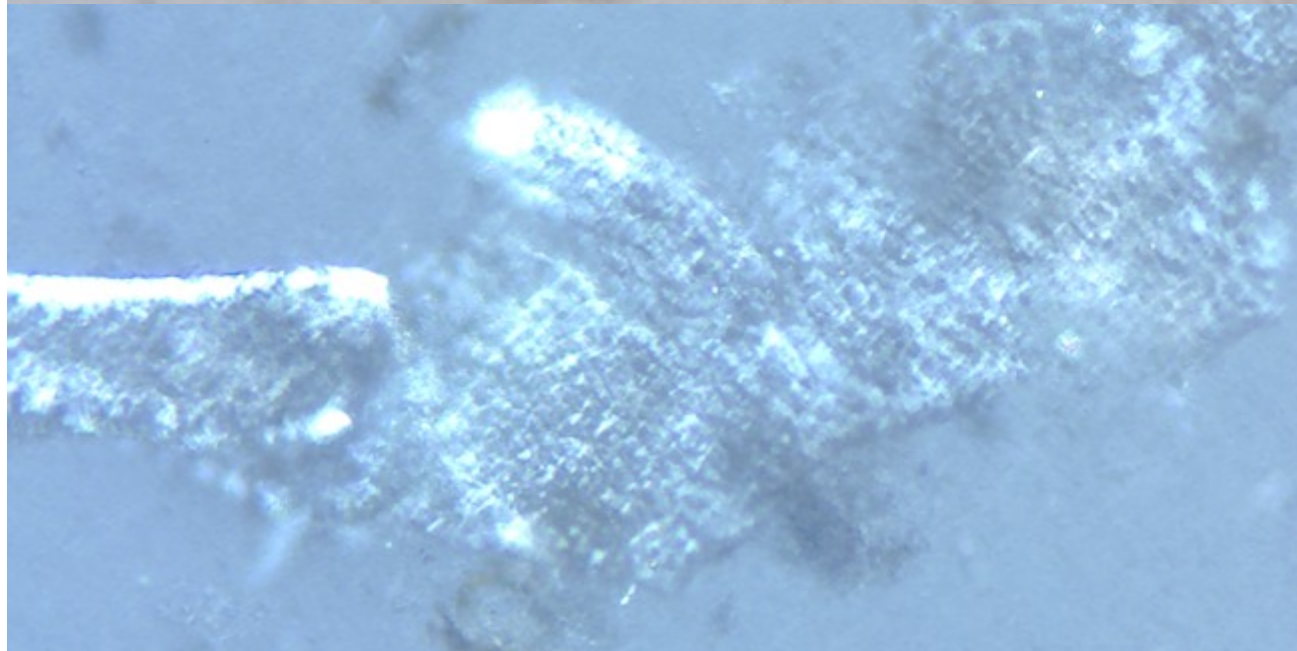

100  $\mu$ m

Chaff?

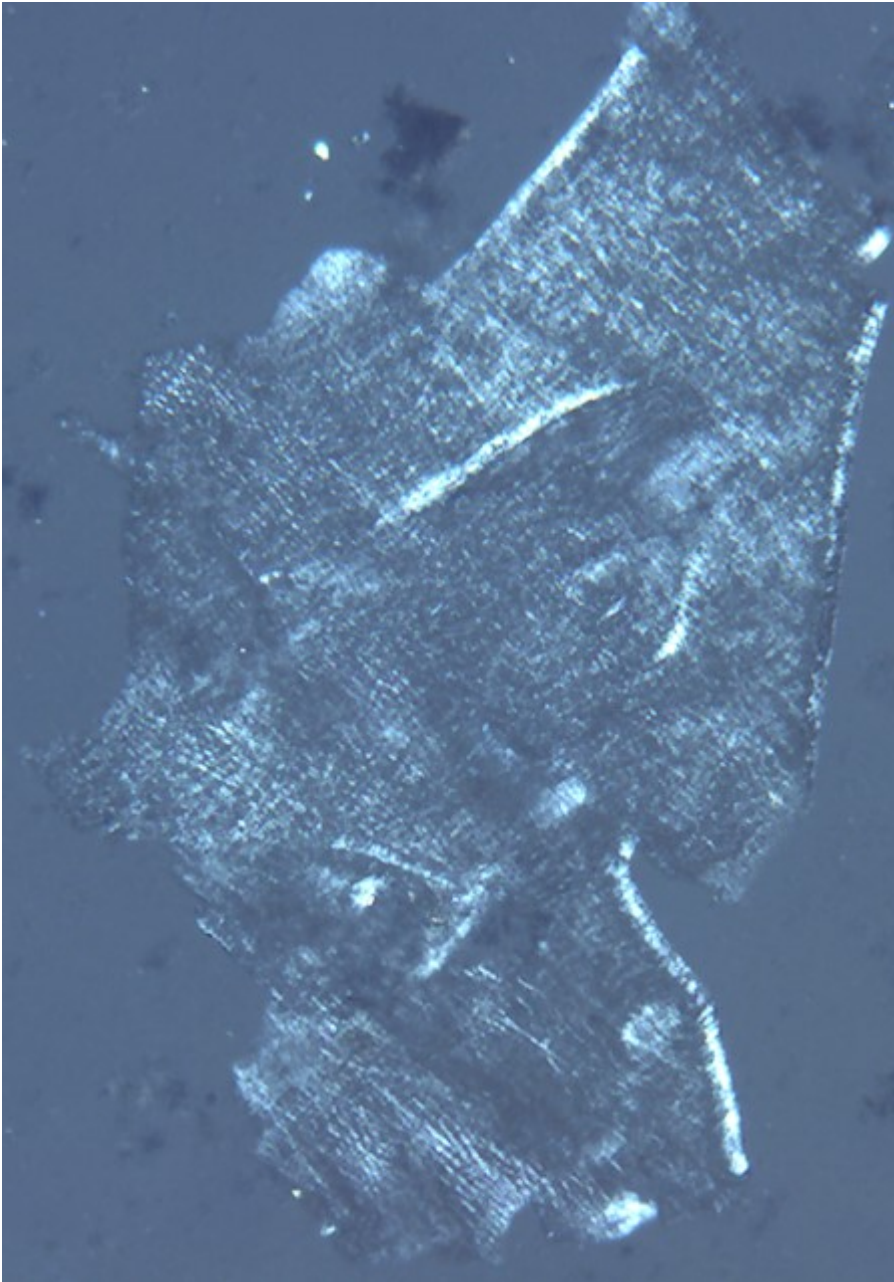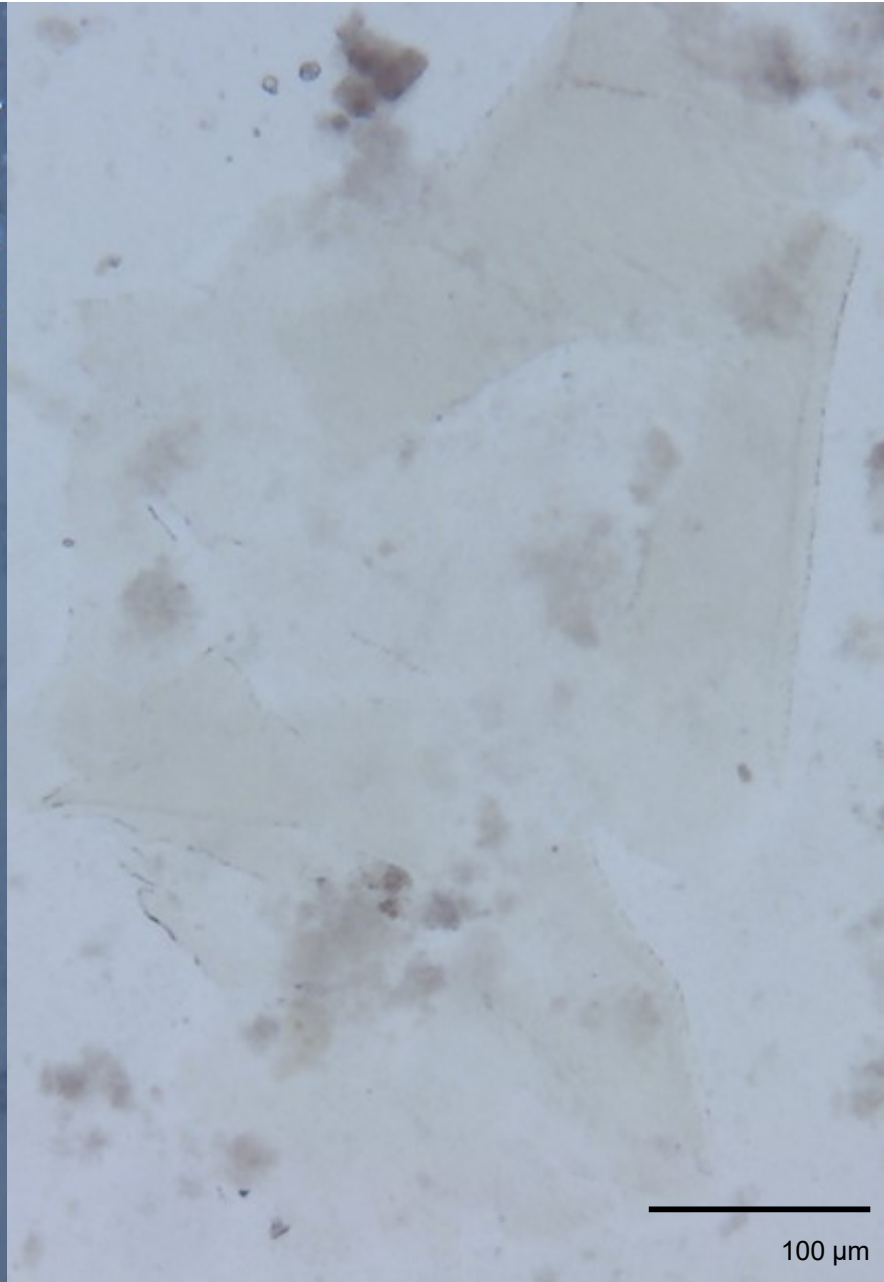



*Zea mays*

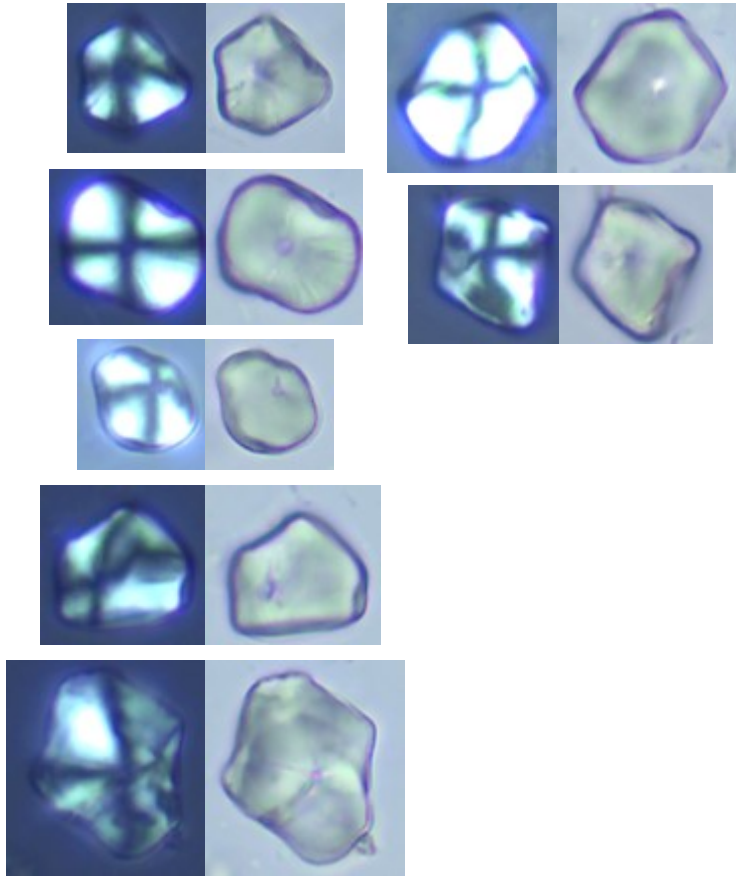

*Avena* spp.

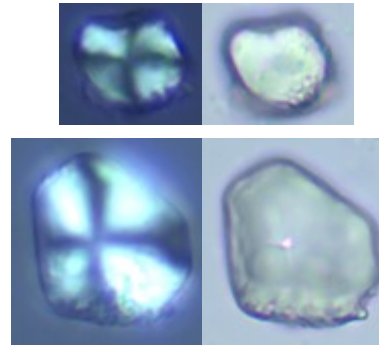

*Triticum* spp.

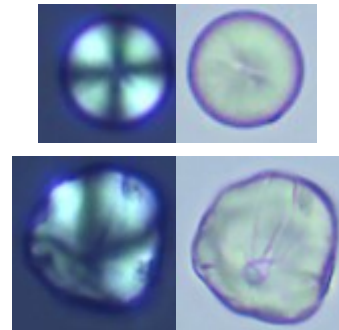

Unknown

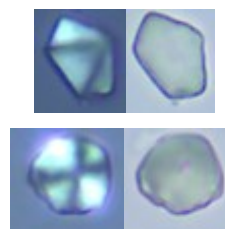

Obscured (not counted)

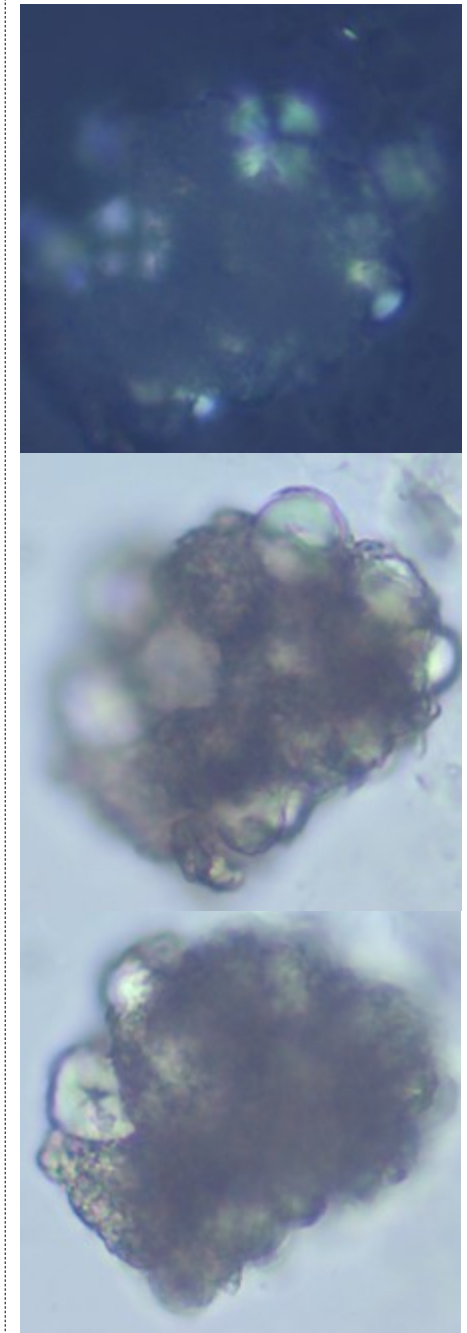

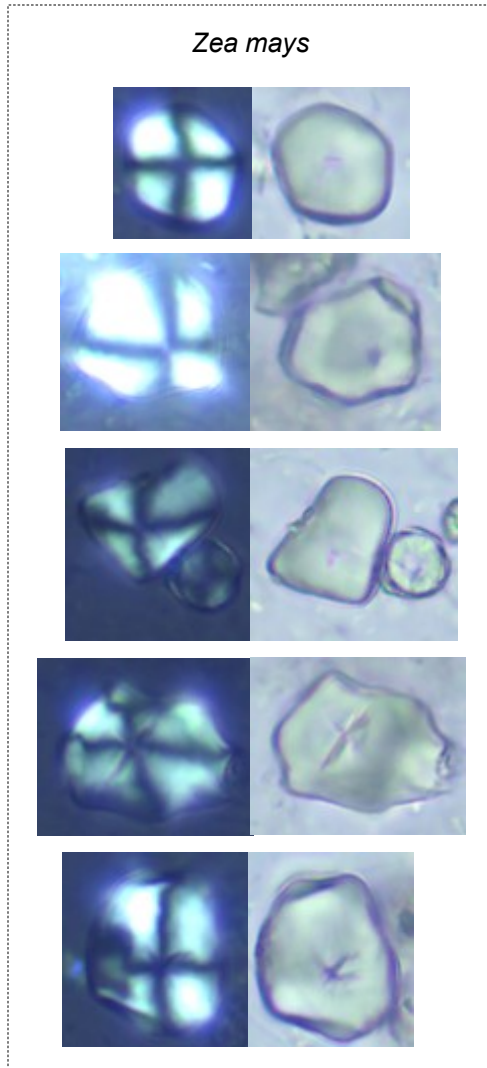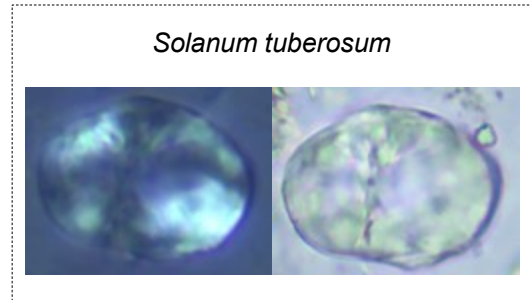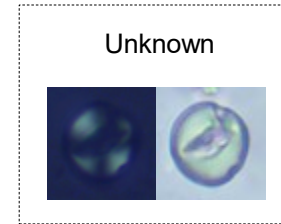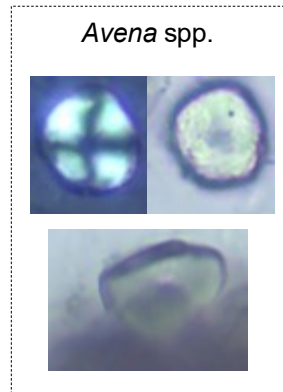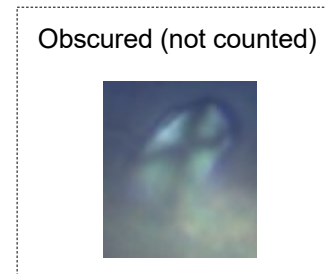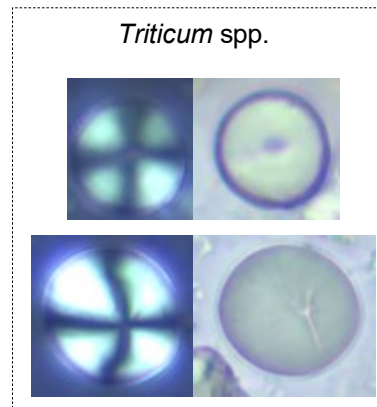

Other unknown organic material

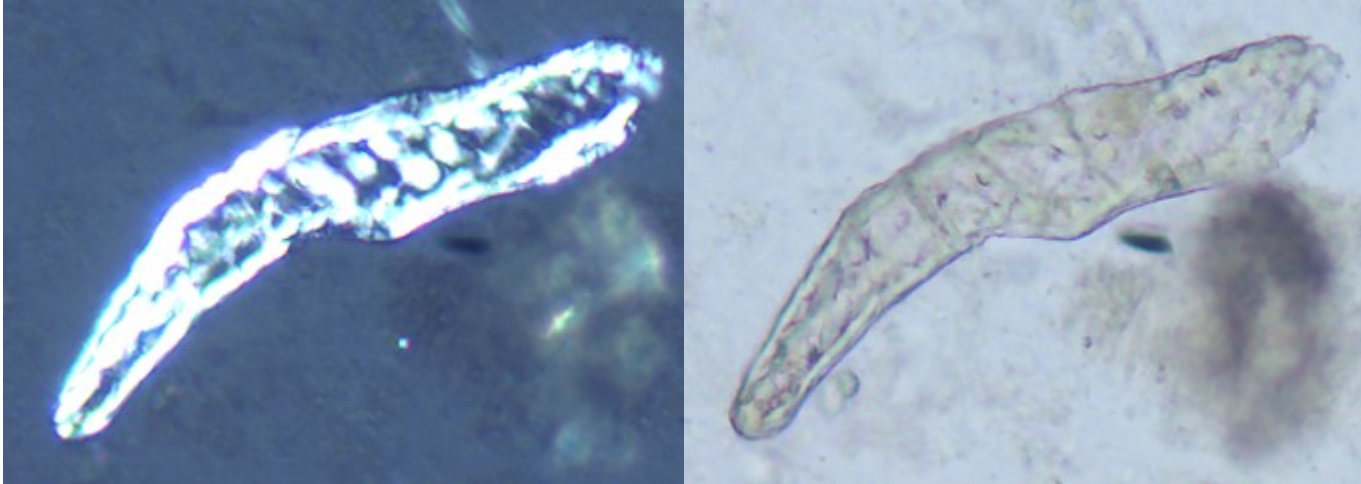

*Zea mays*

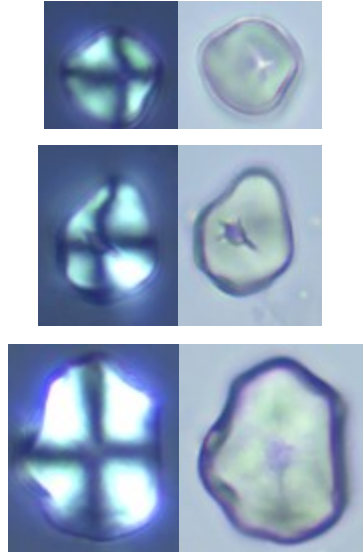

*Triticum* spp.

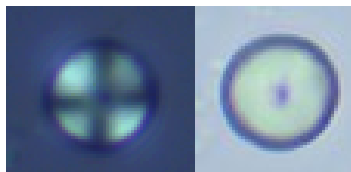

Unknown

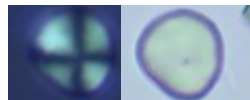

Other unknown organic material

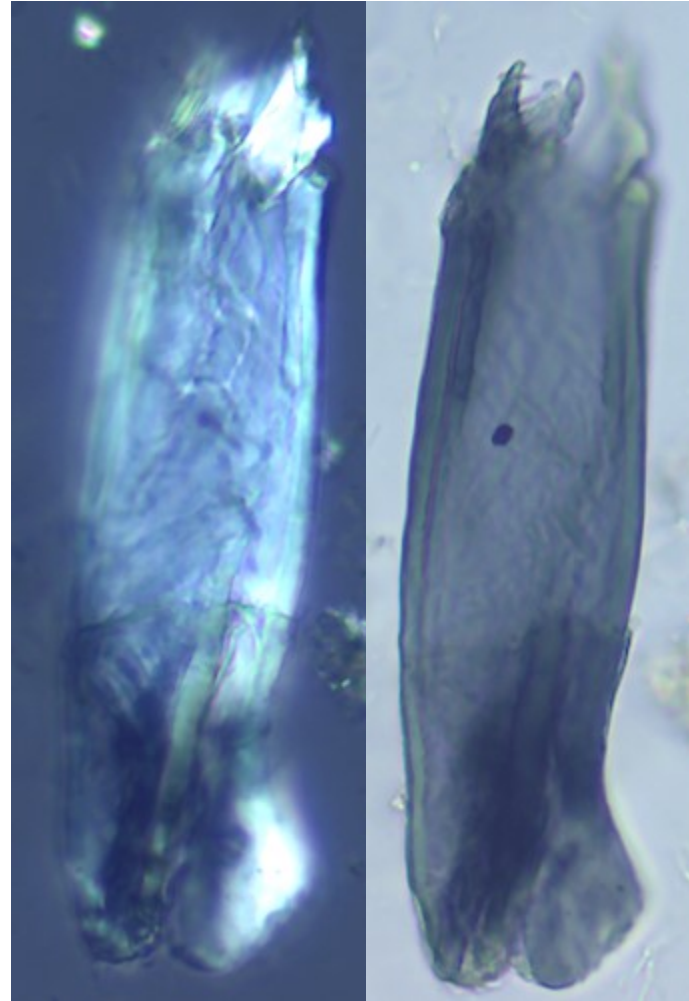

Kilkenny Union Workhouse (05E0435)  
Microparticle Lab # 17  
Burial XLVIII (36–45 years, Female)

Fungus

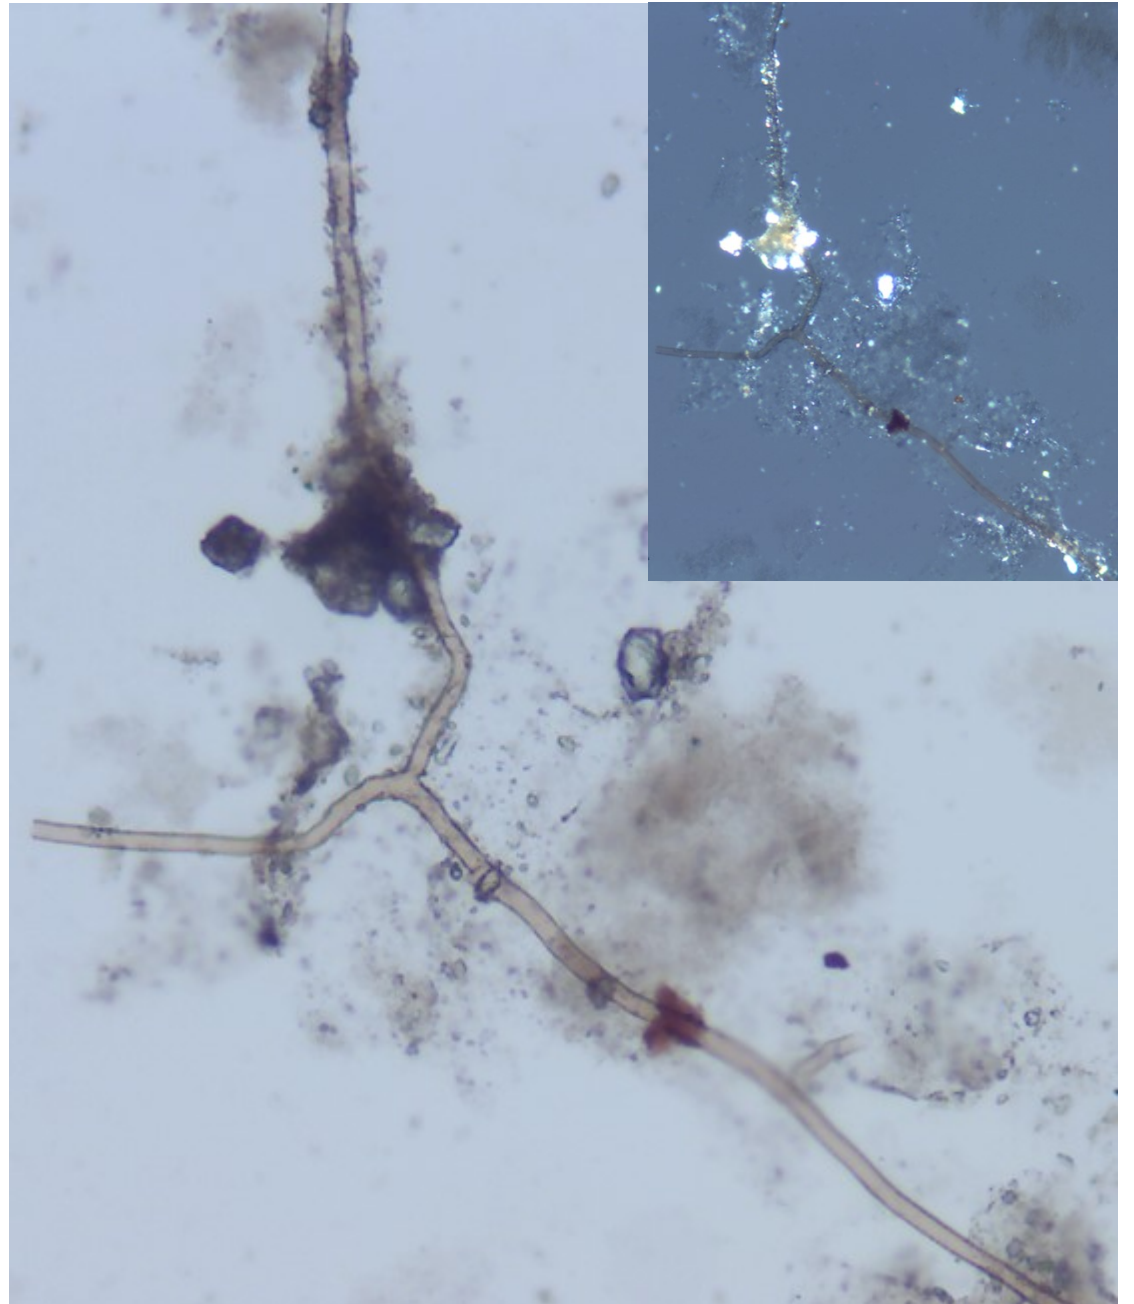

100  $\mu$ m

Kilkenny Union Workhouse (05E0435)  
Microparticle Lab # 18  
Burial CLXVII (26–35 years, Female)

*Triticum* spp.

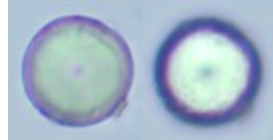

(same granule, different views)

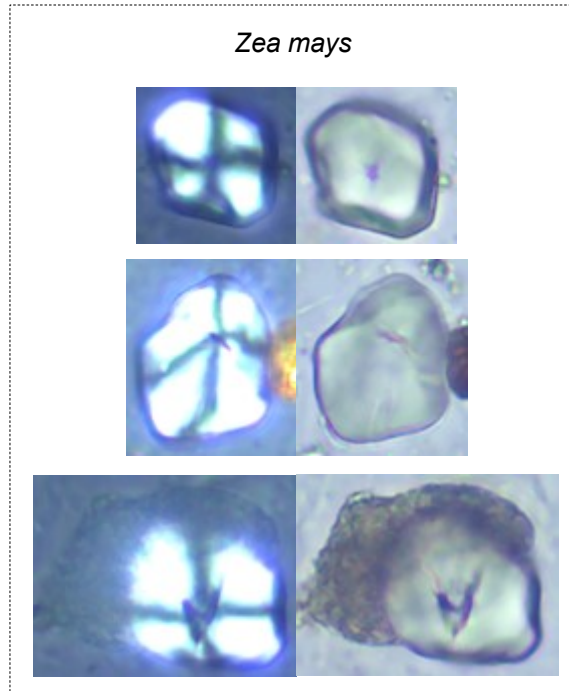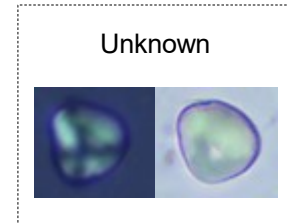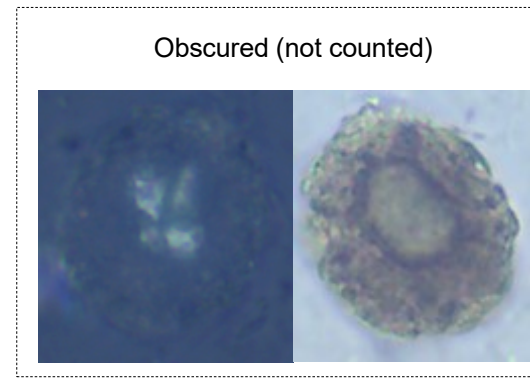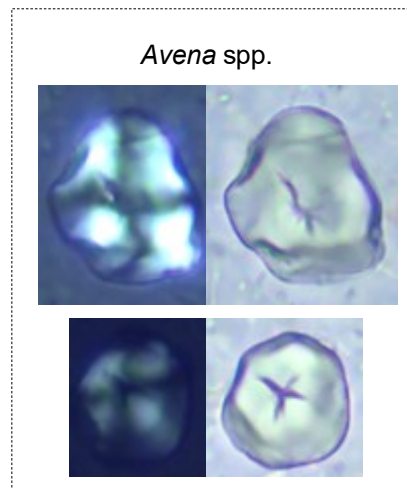

Hairs/Fibres

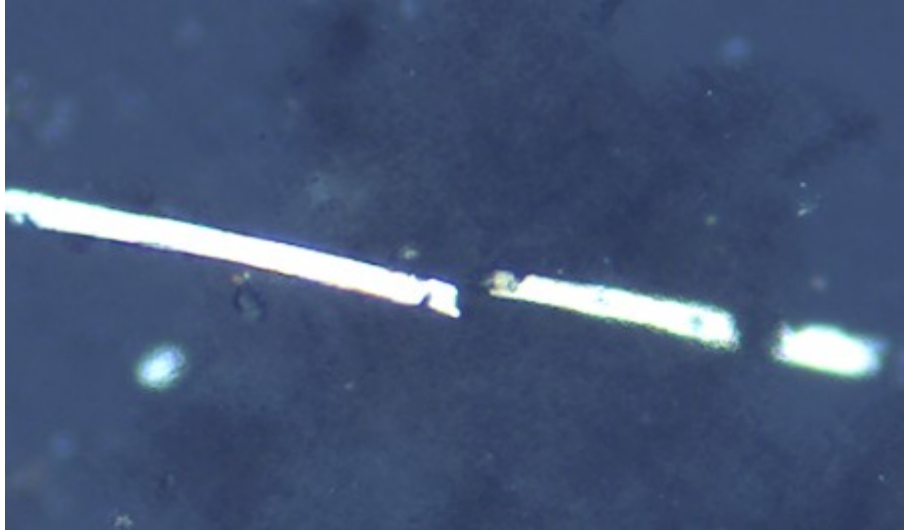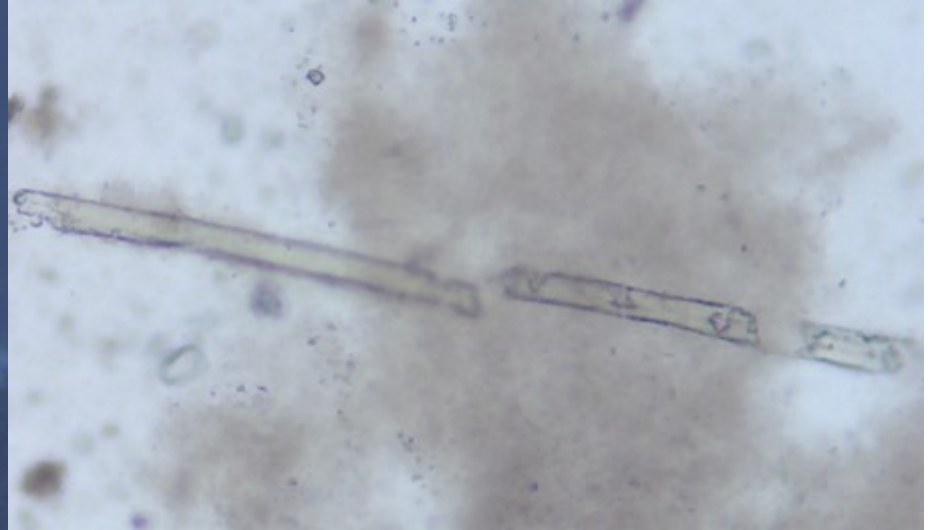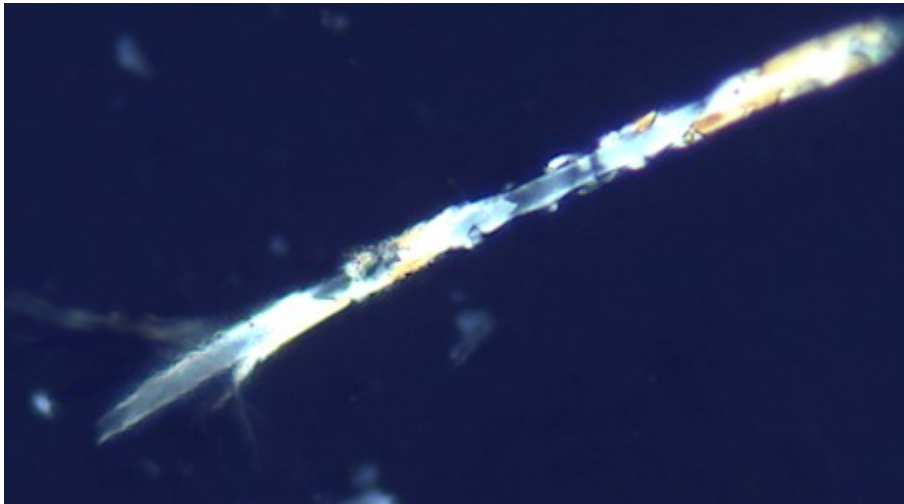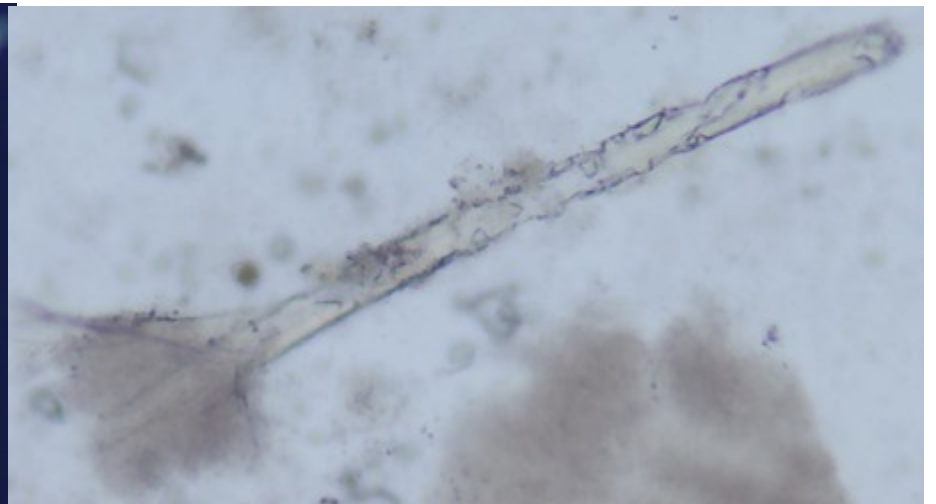



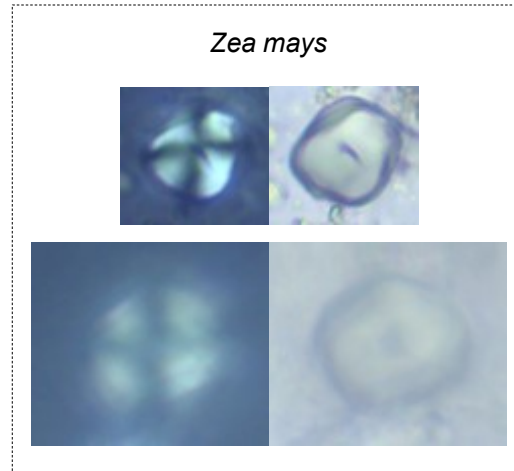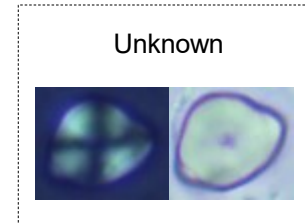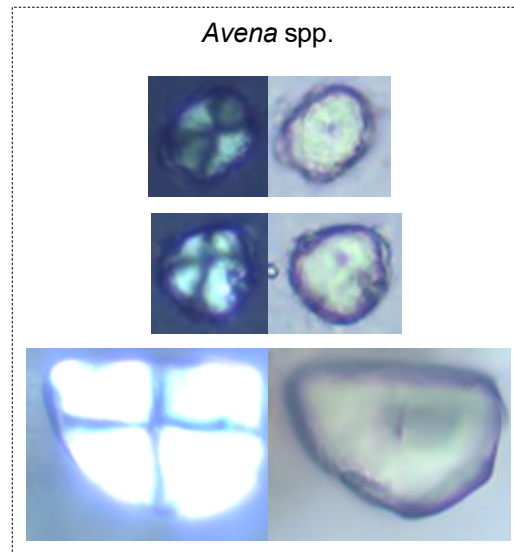

Hairs/Fibres

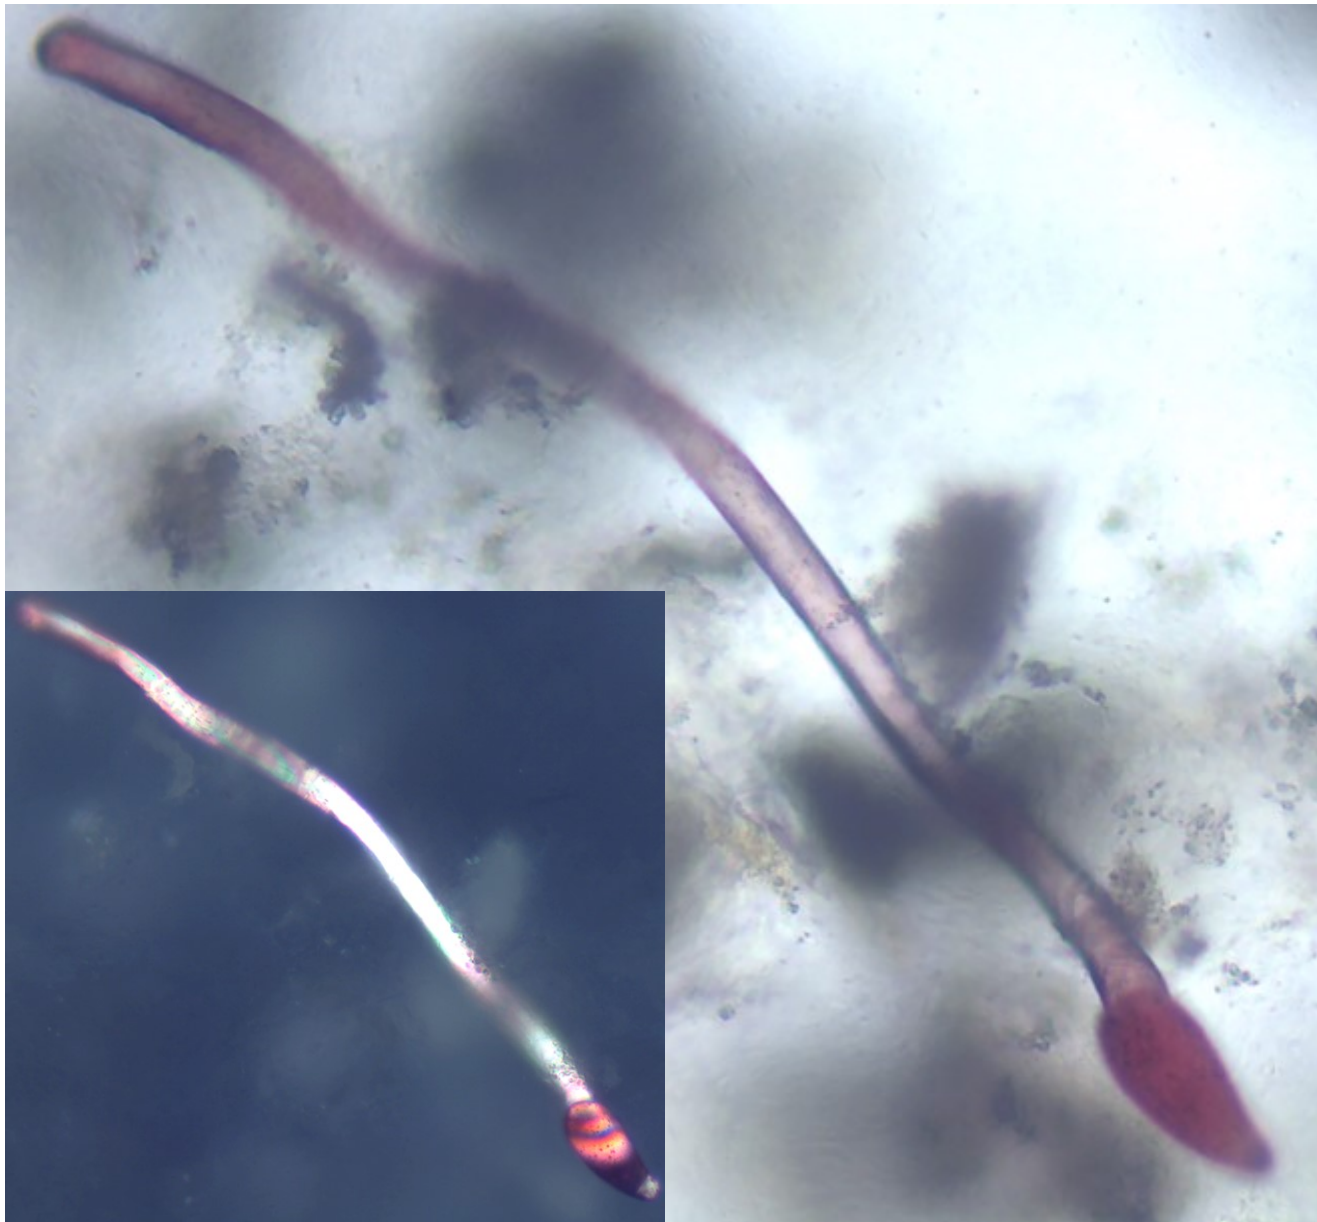

10  $\mu$ m

Hairs/Fibres (Cotton?)

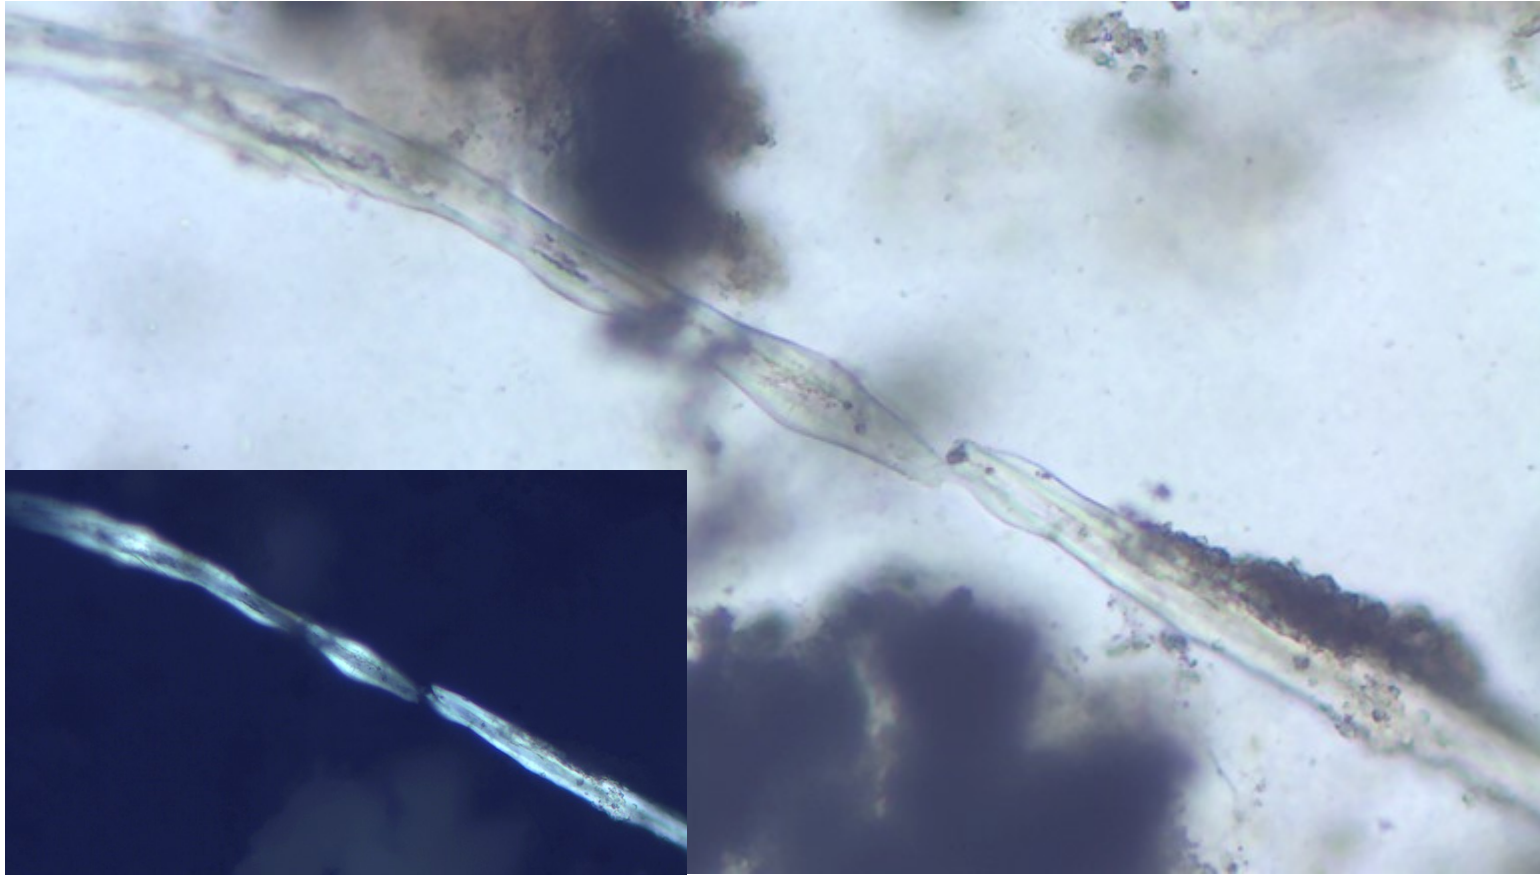

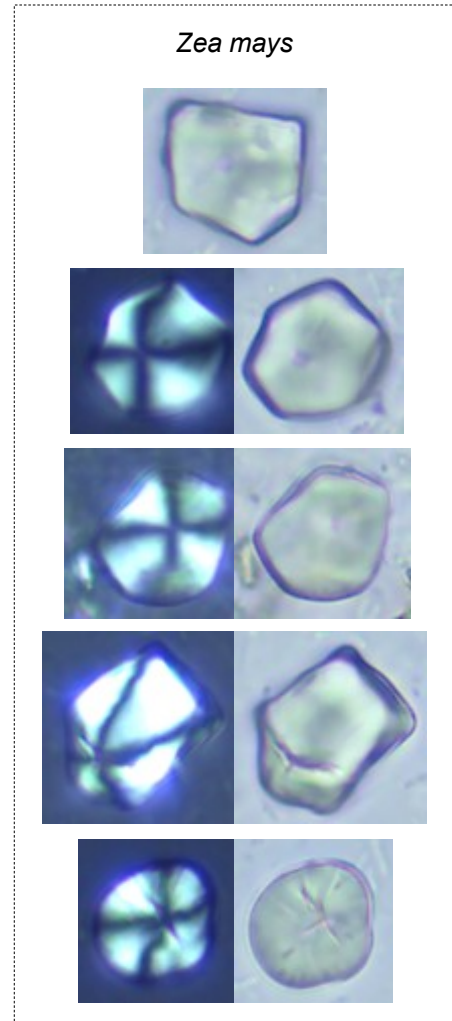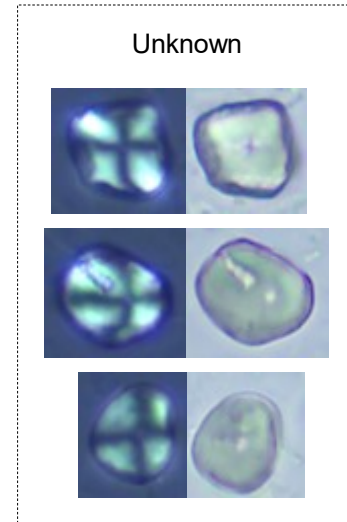

Chaff?

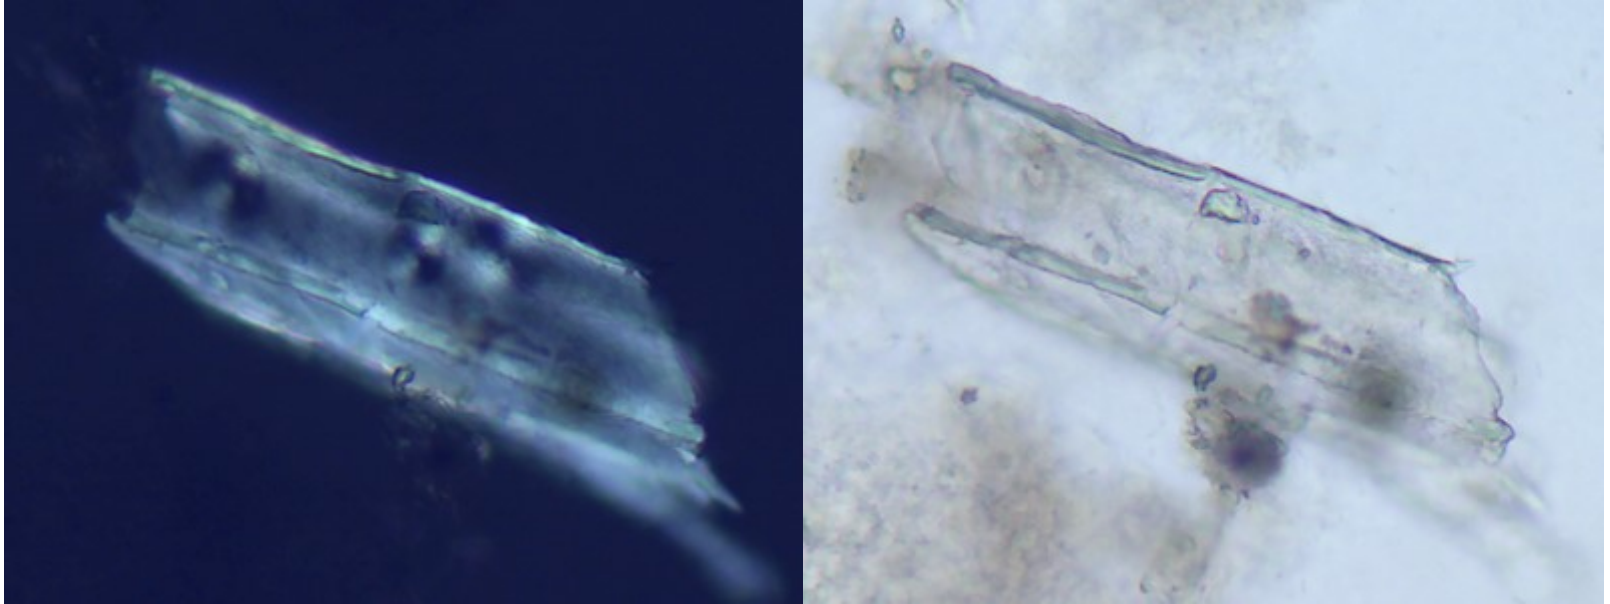

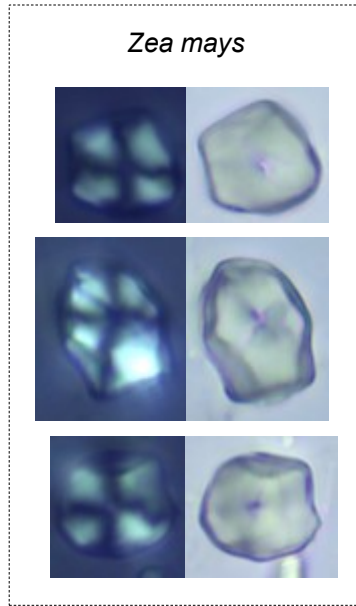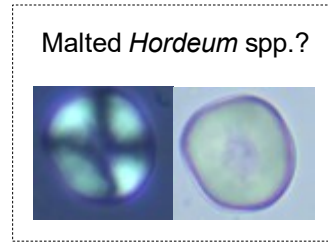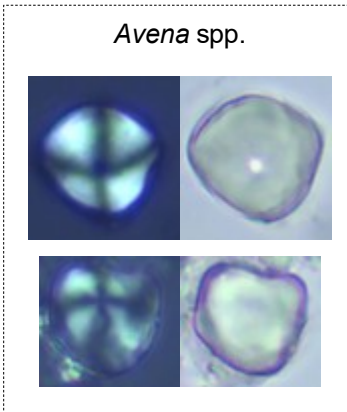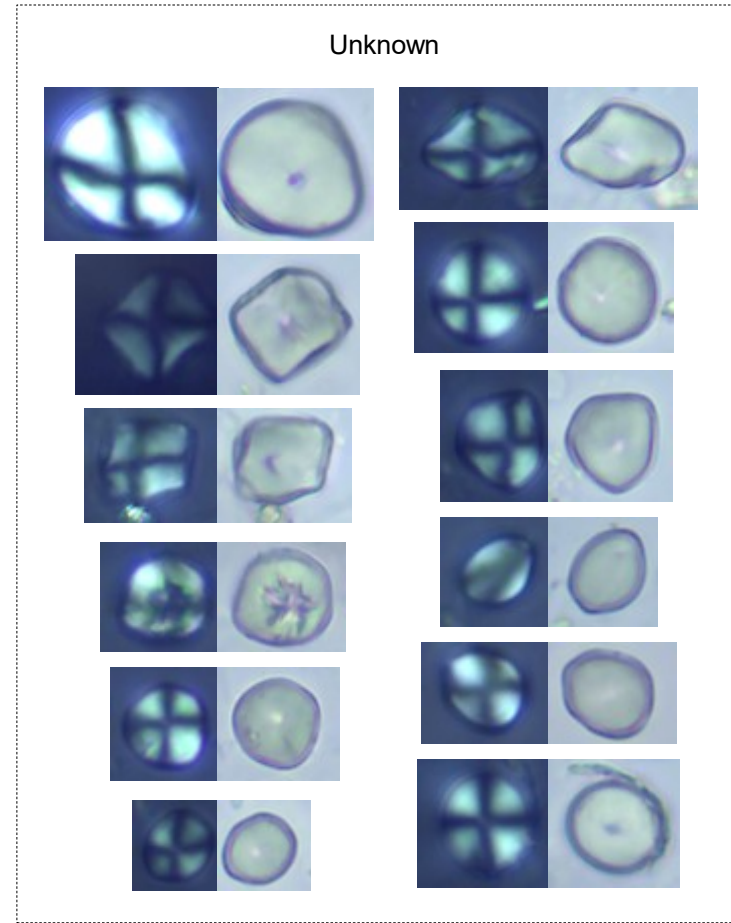

*Zea mays*

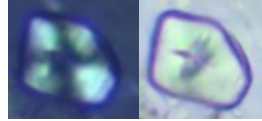

*Triticum* spp.

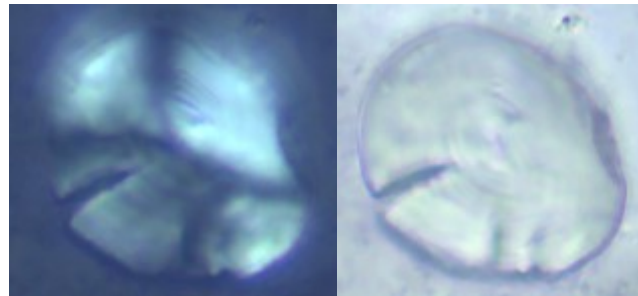

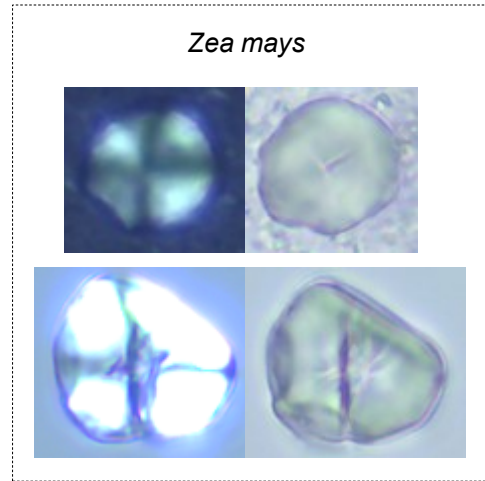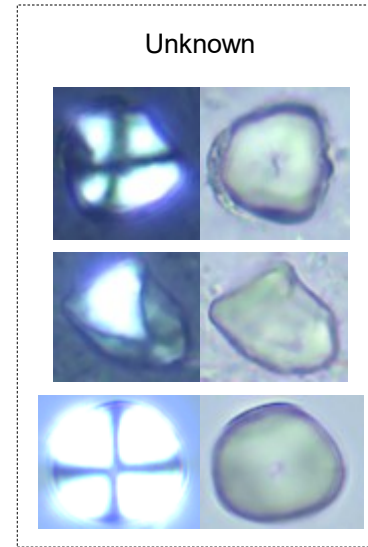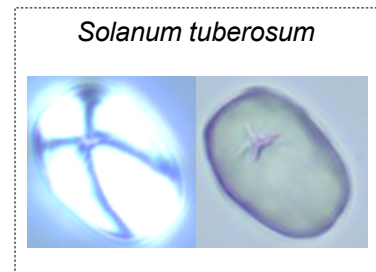



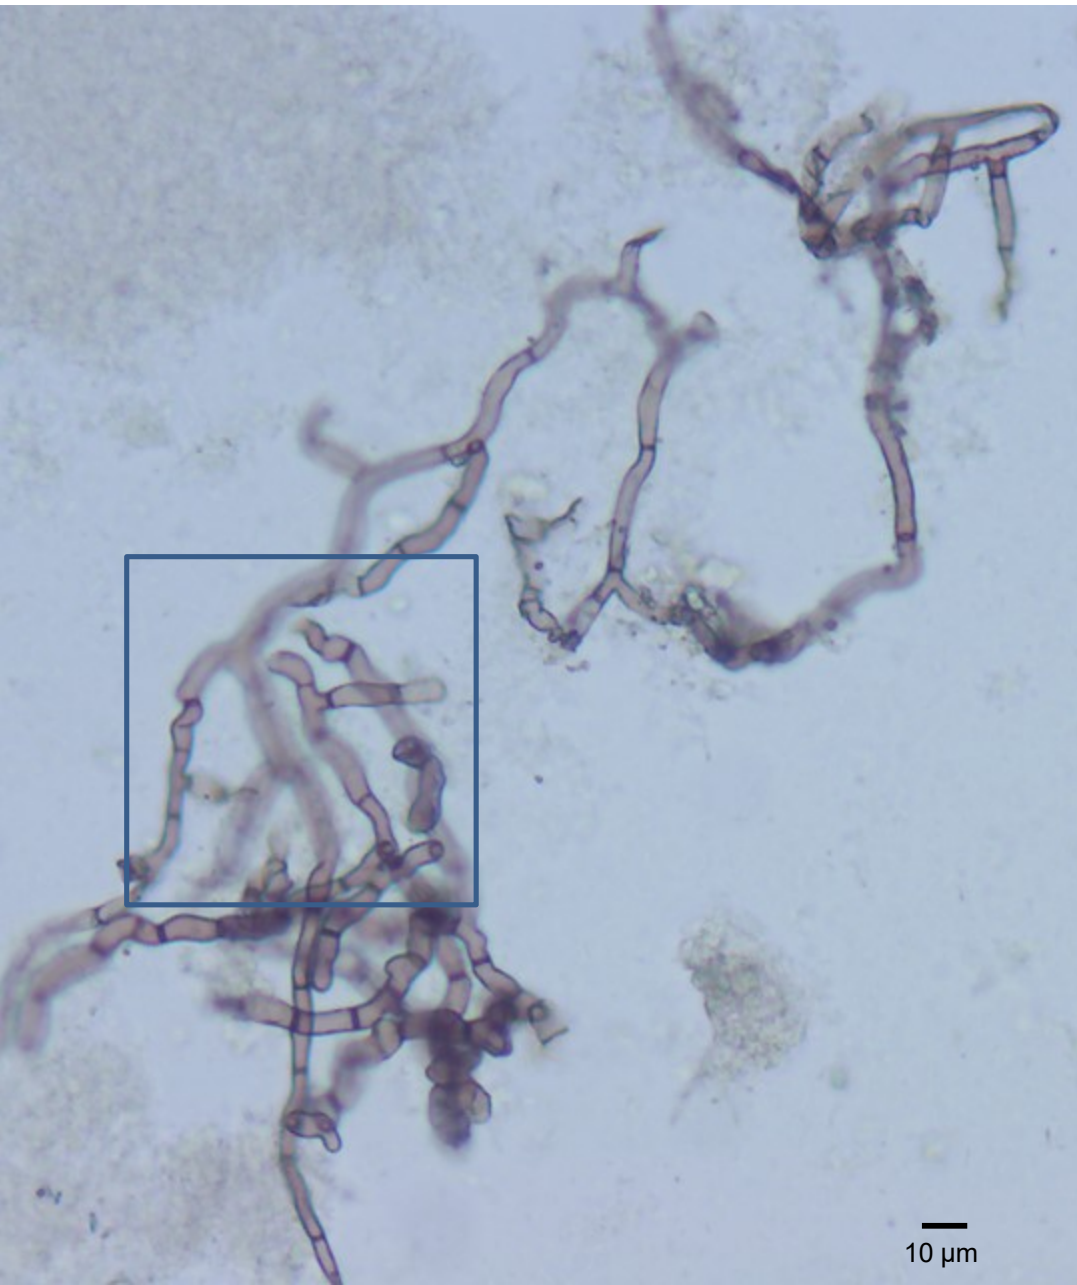

Fungus

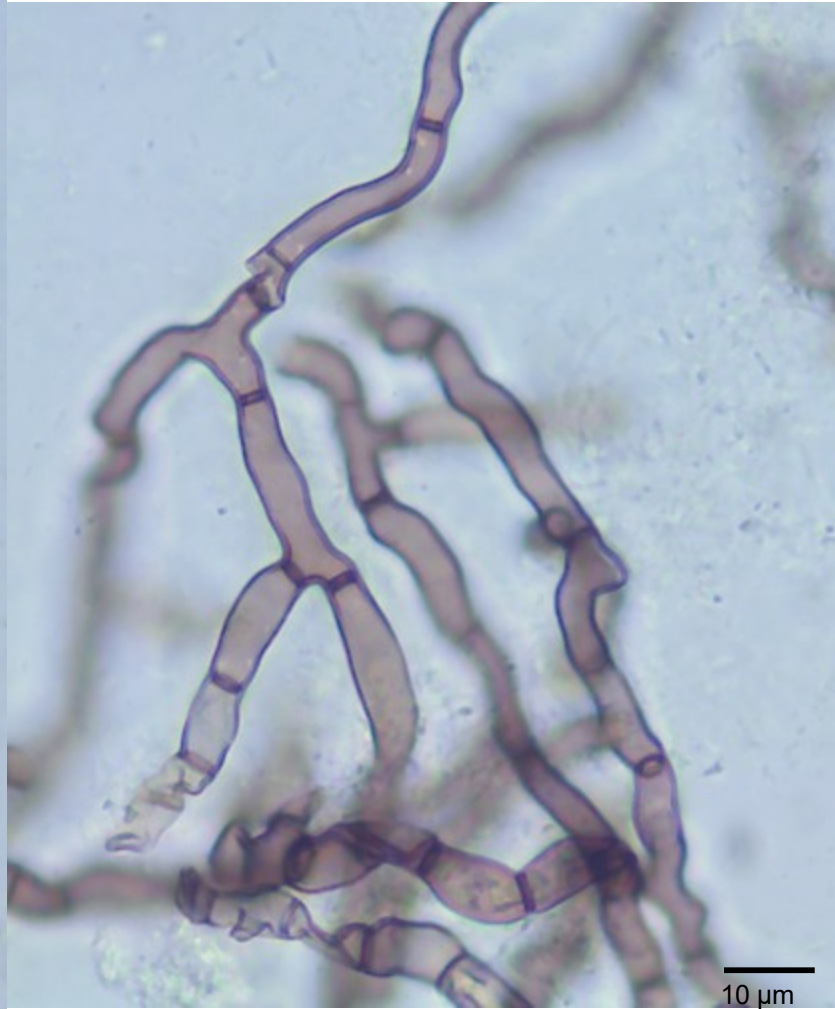

Kilkenny Union Workhouse (05E0435)  
Microparticle Lab # 24  
Burial DLXXII (36–45 years, Female)

Fungus

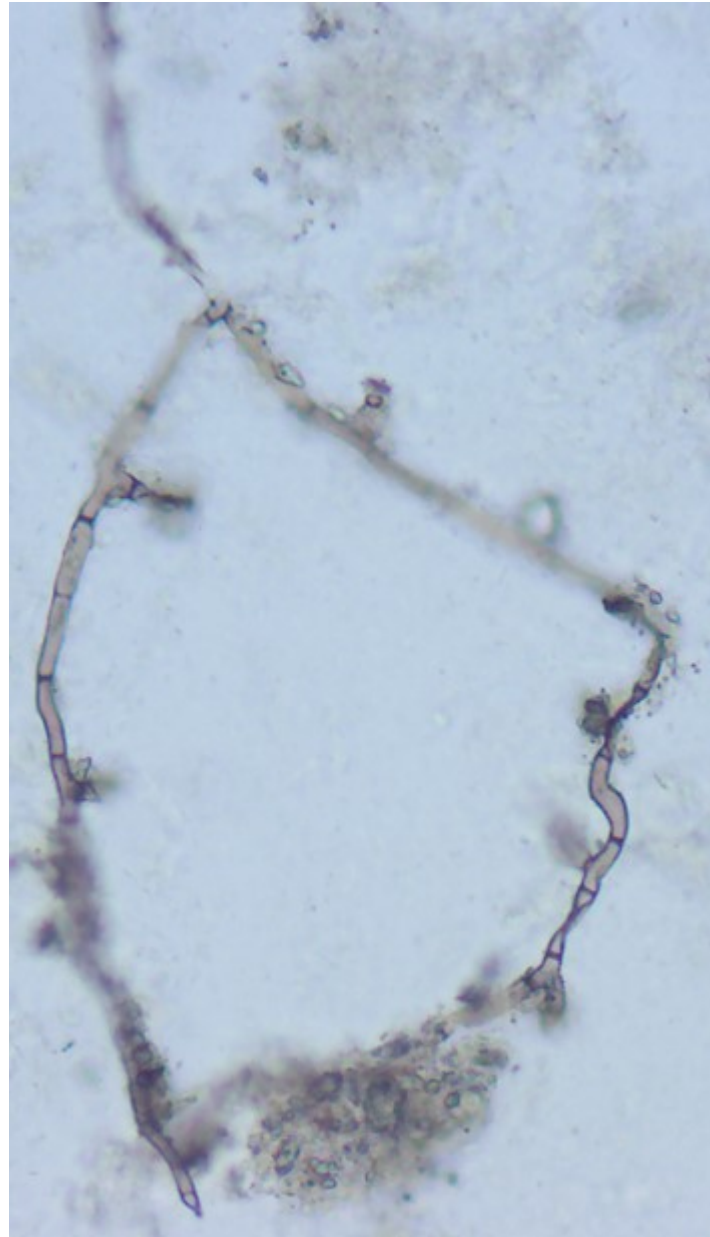

—  
10  $\mu$ m

Other unknown organic material

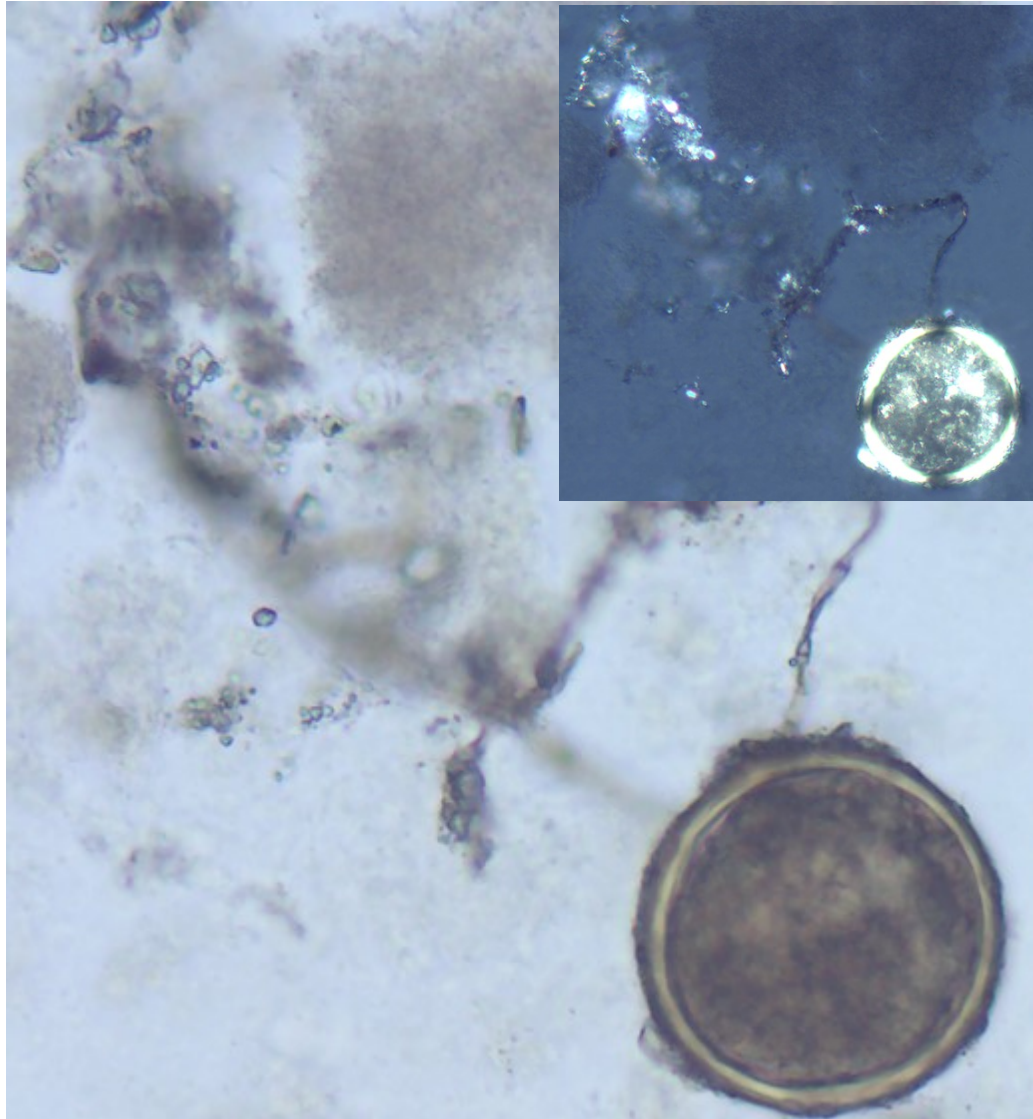

Chaff?

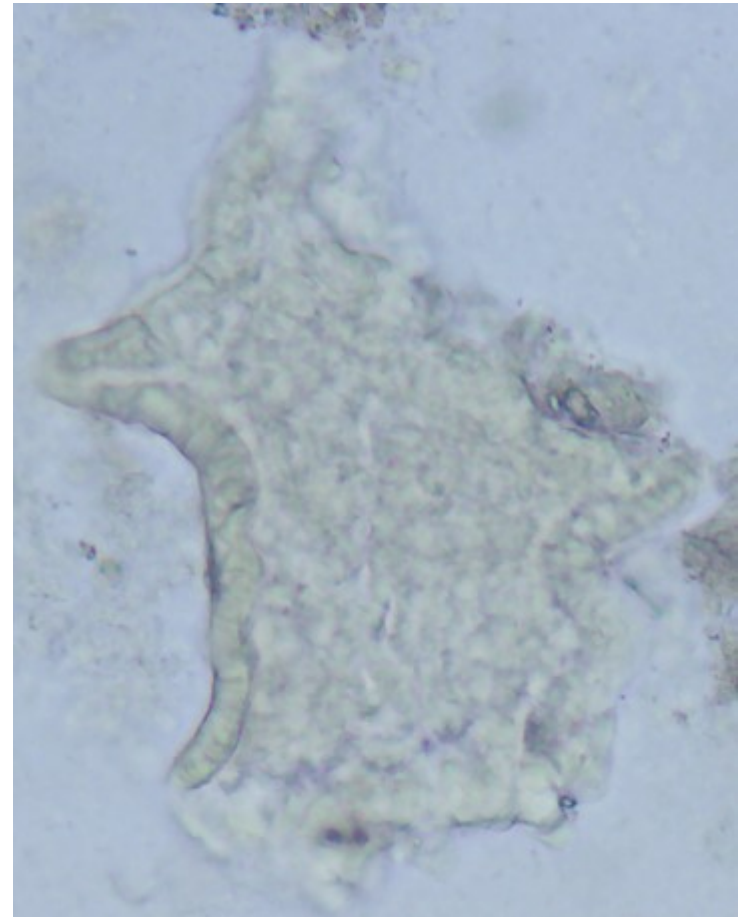

Chaff?

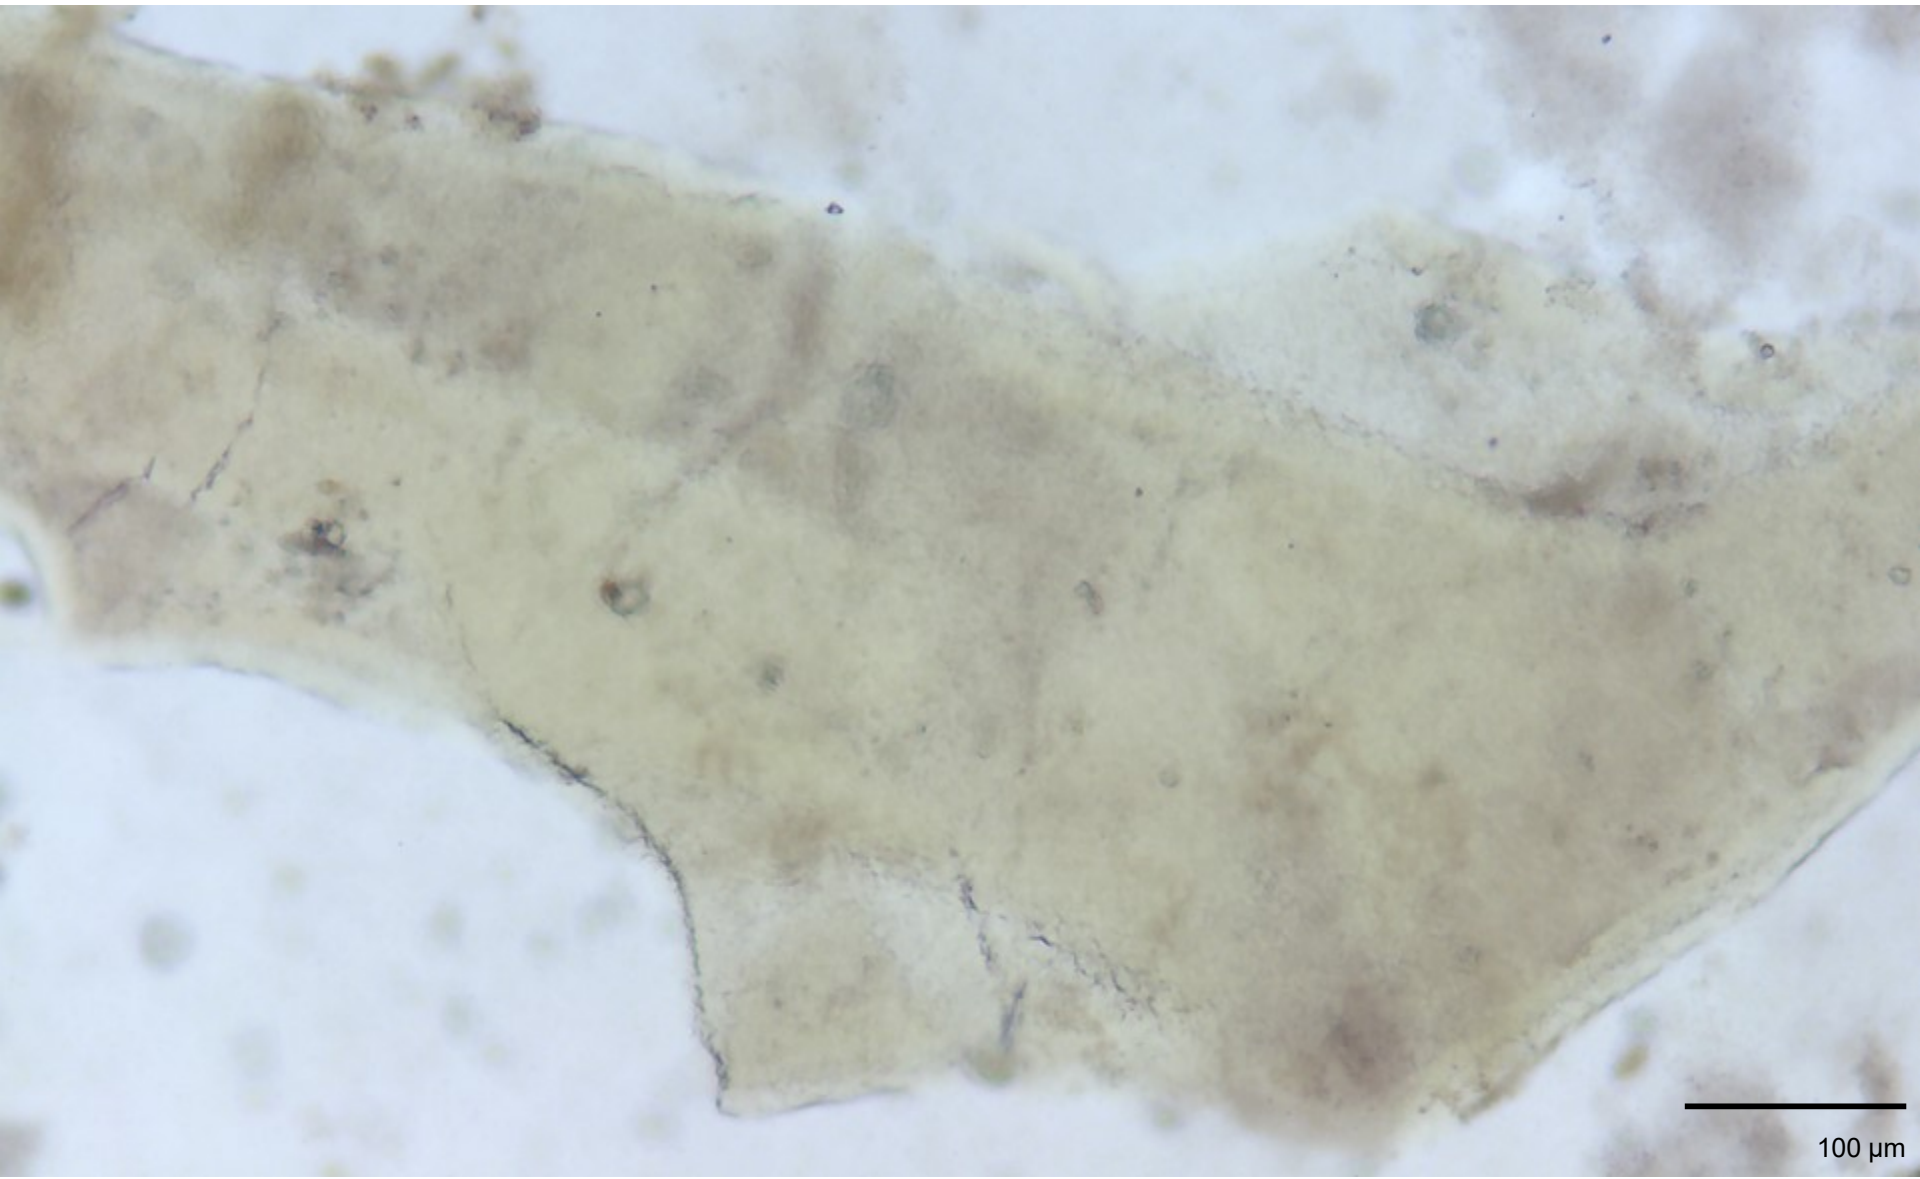

*Zea mays*

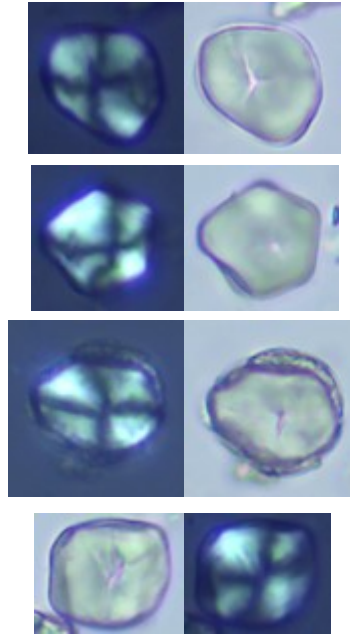

Unknown

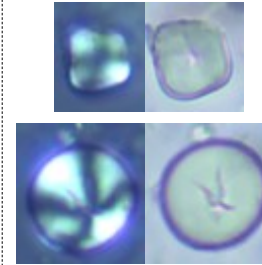

*Avena* spp.

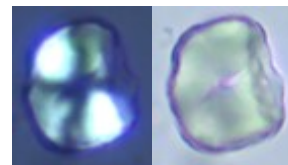

Hairs/Fibres

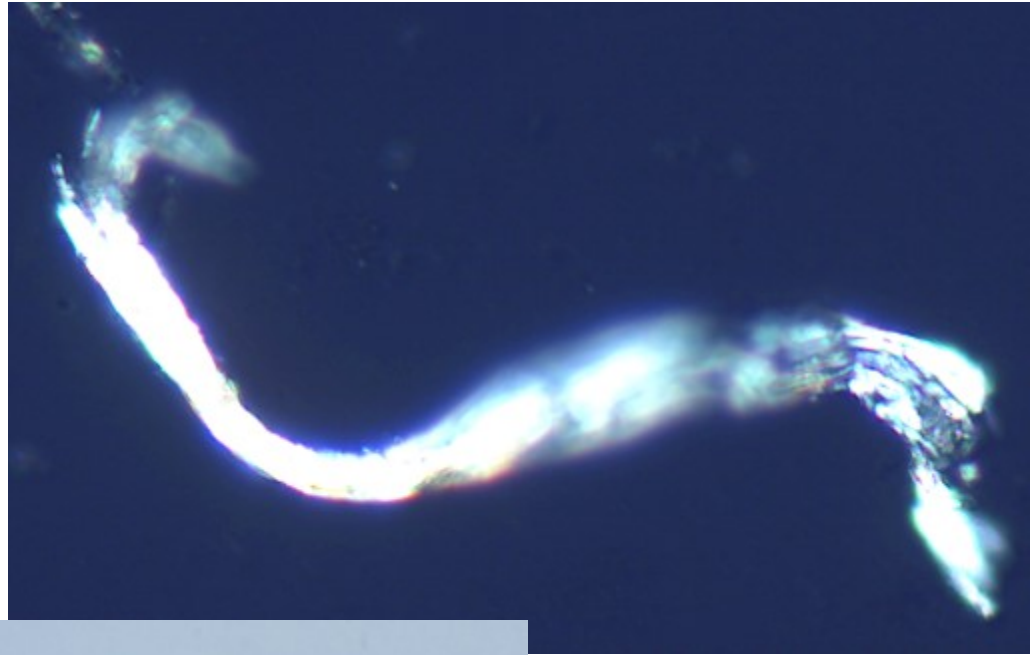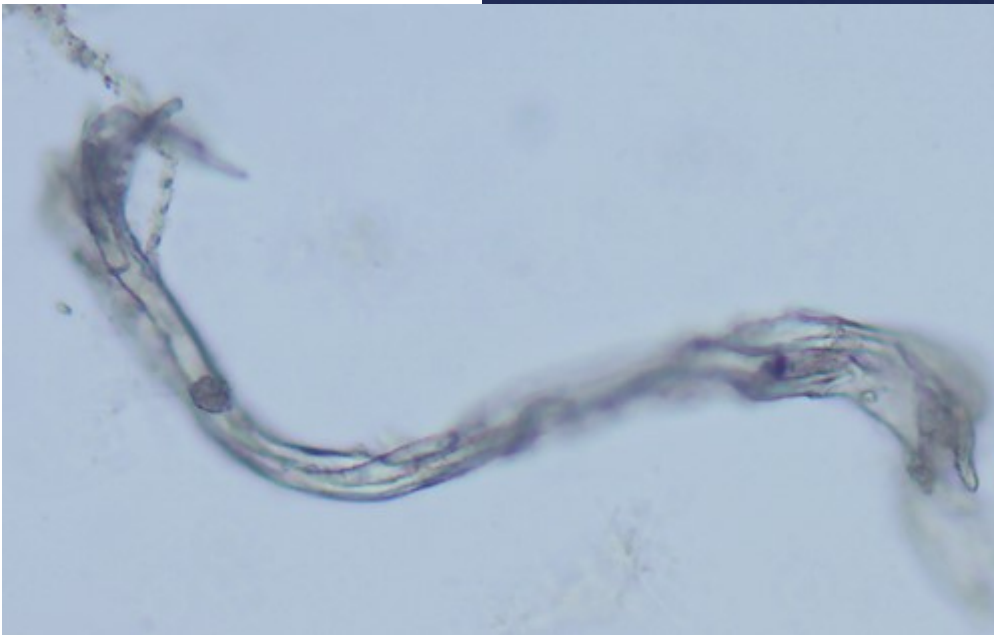

*Zea mays*

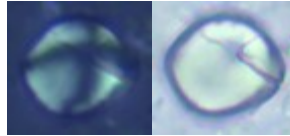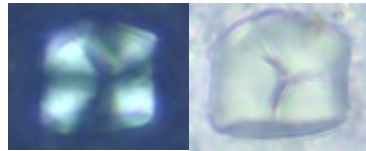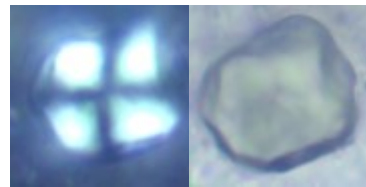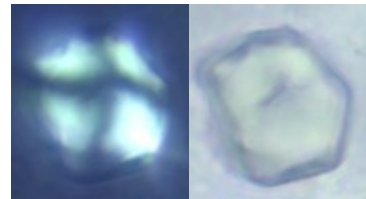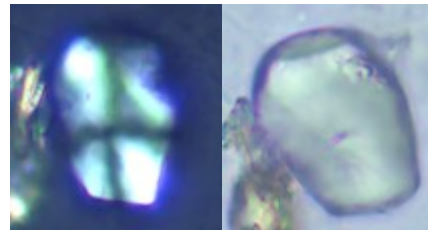

Unknown

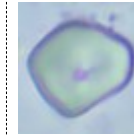

Hairs/Fibres

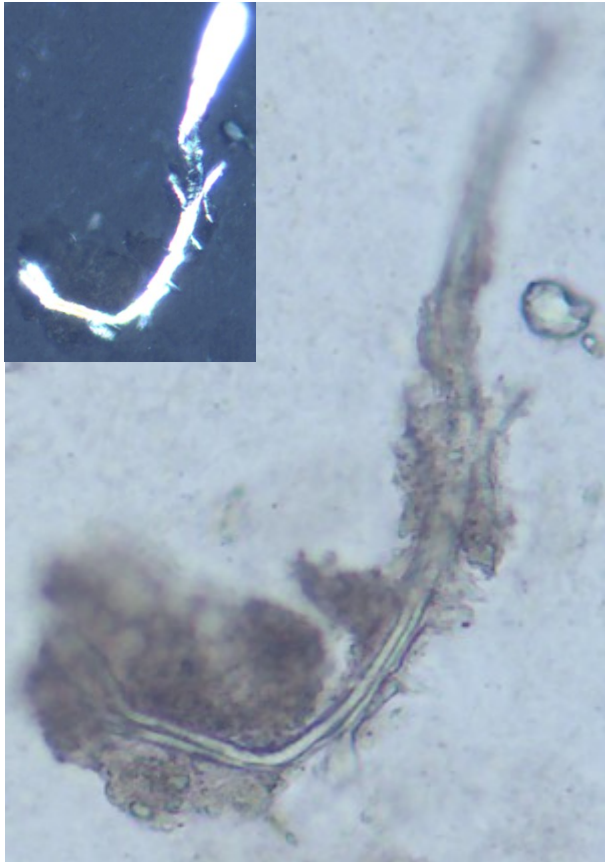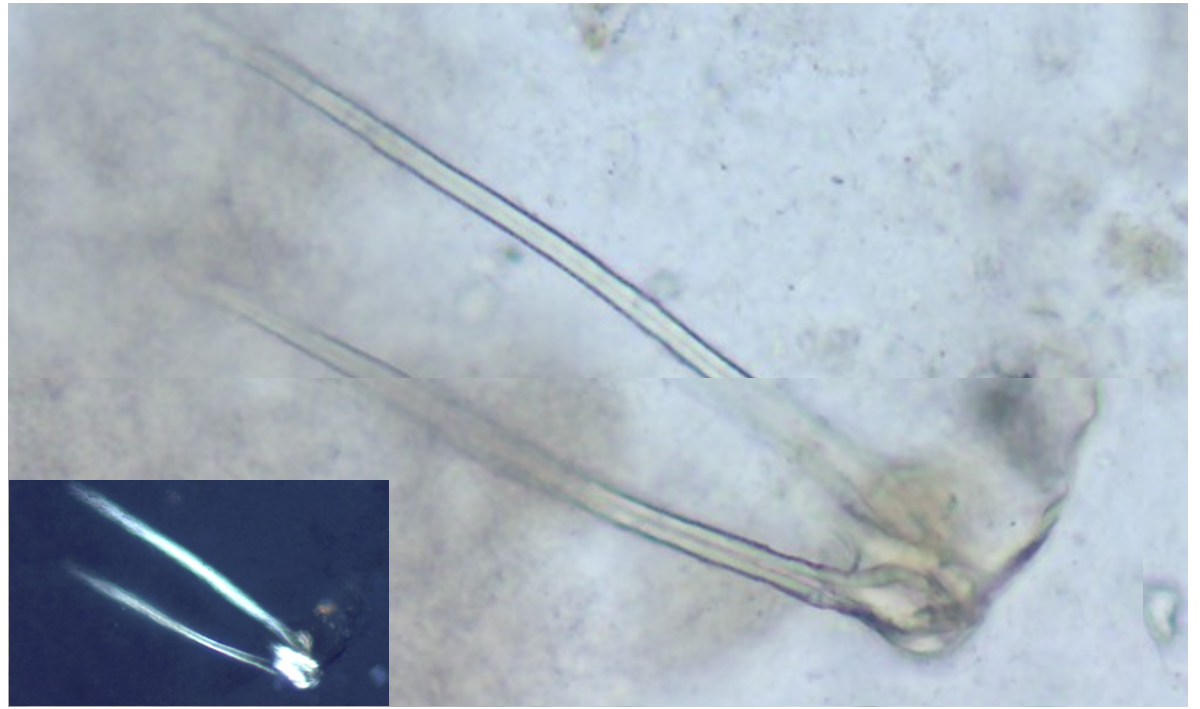



Hairs/Fibres

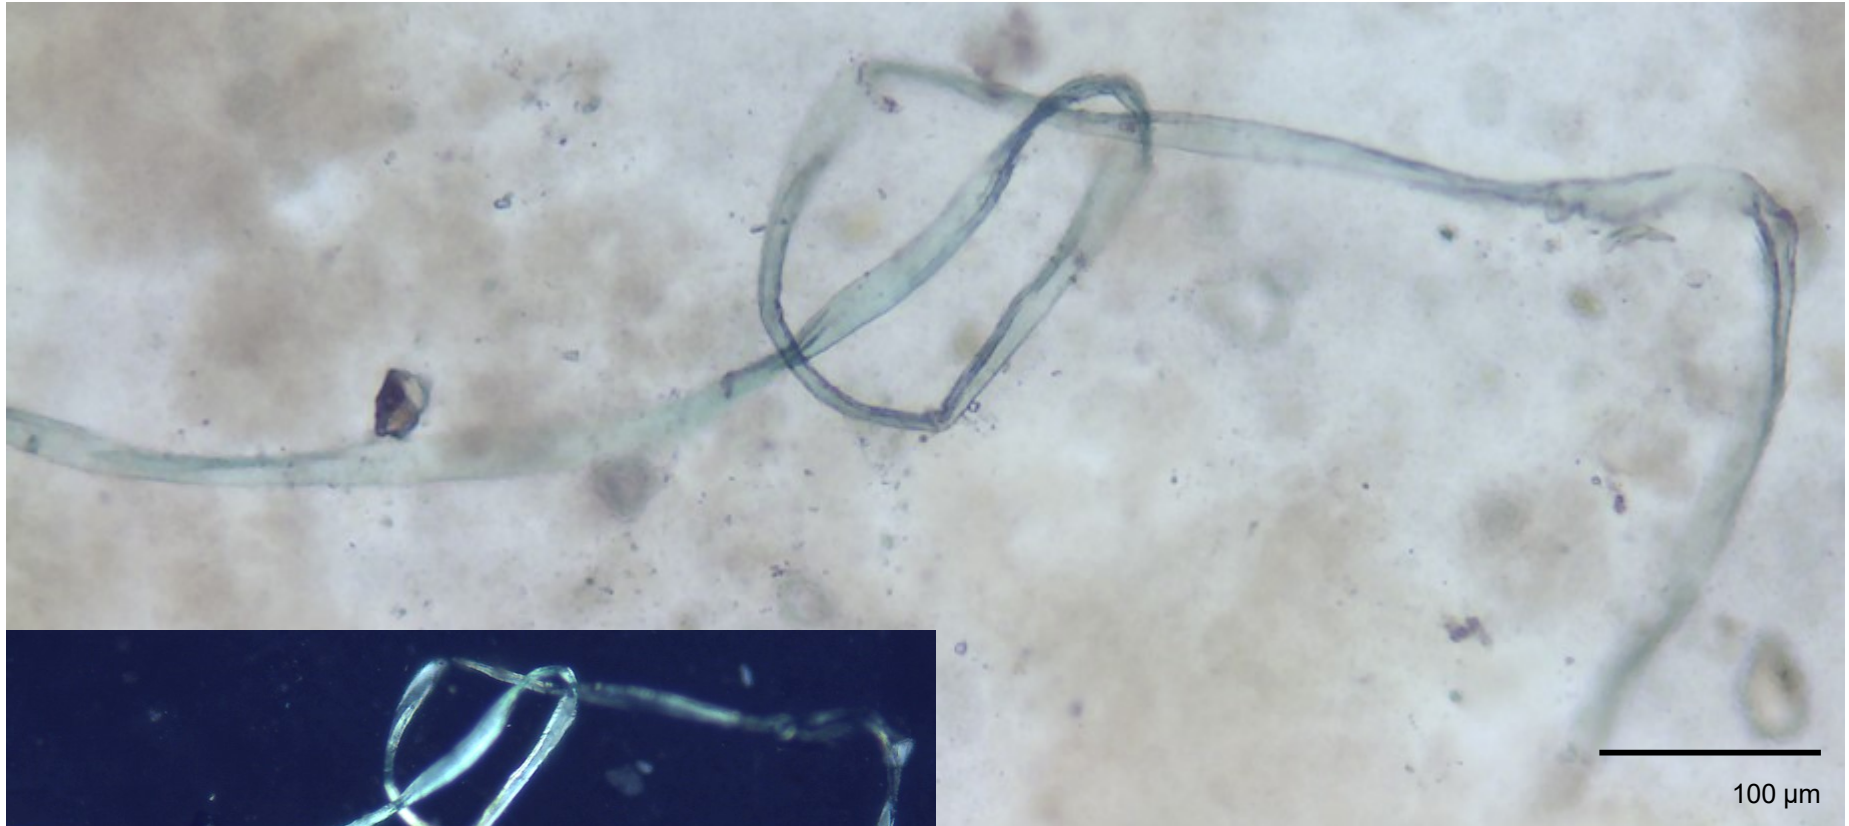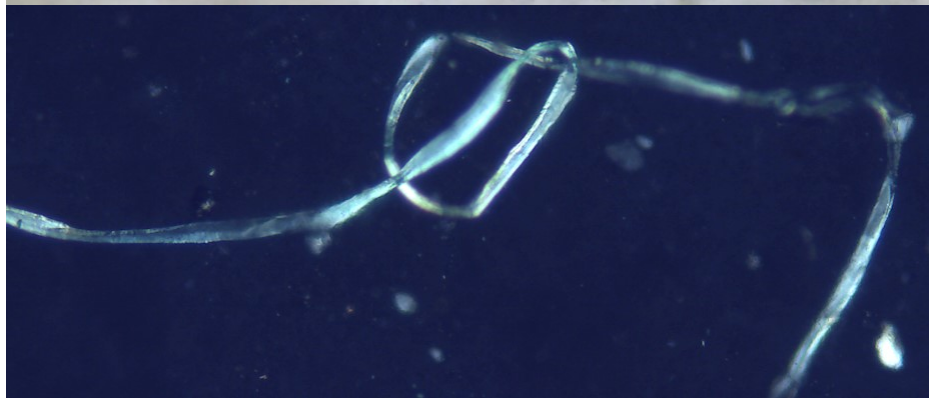

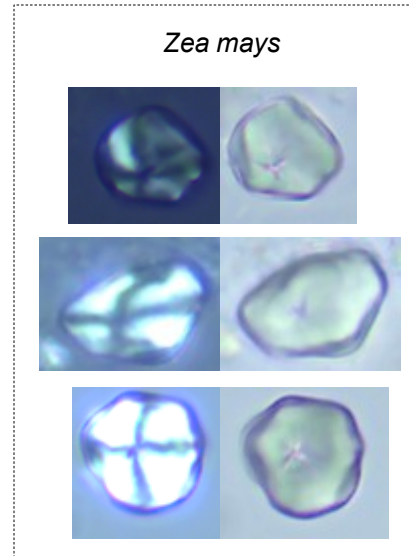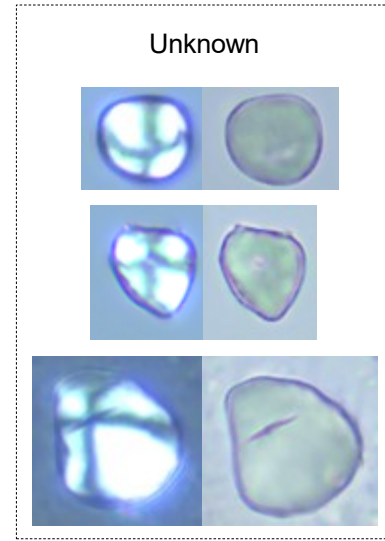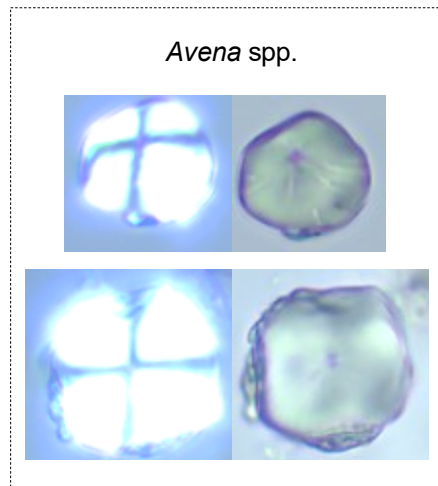

Hairs/Fibres

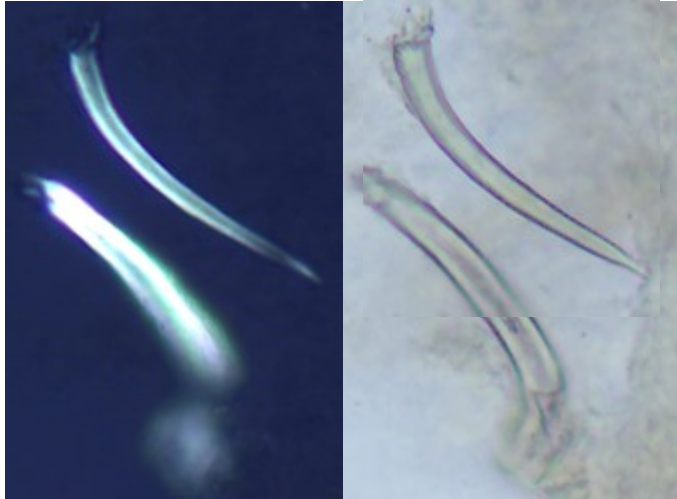

Bast fibre?

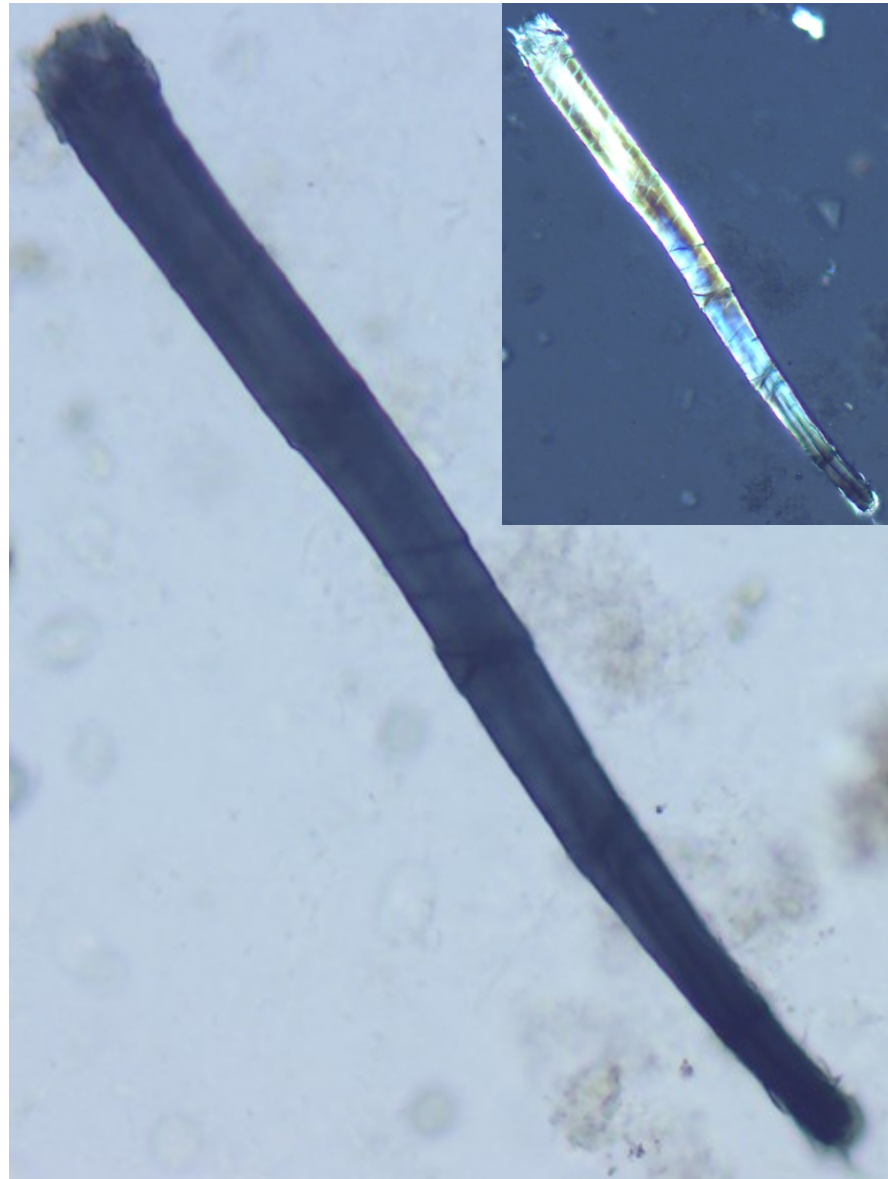

Fungus

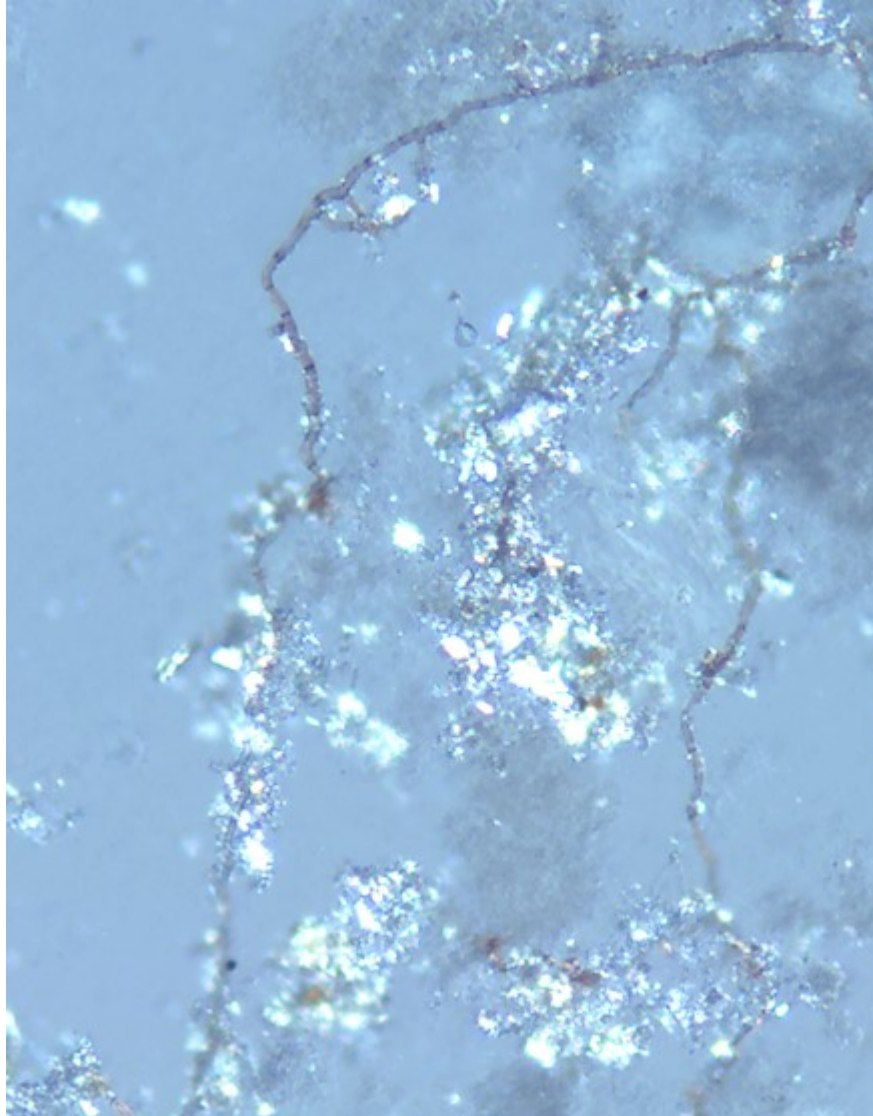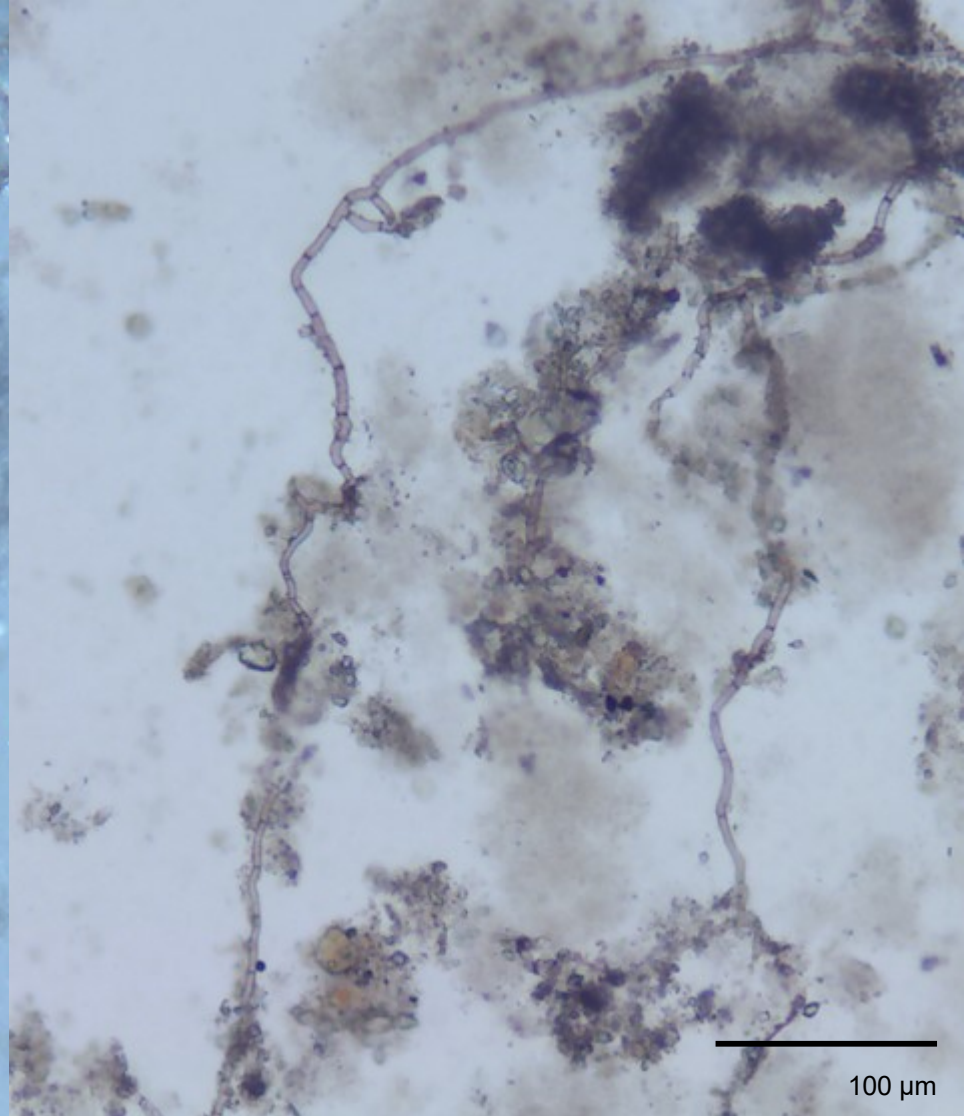

100  $\mu$ m

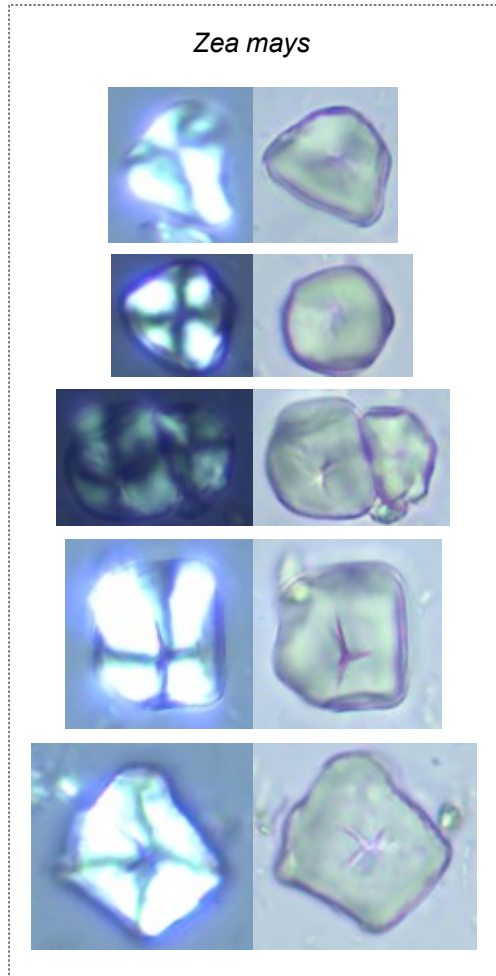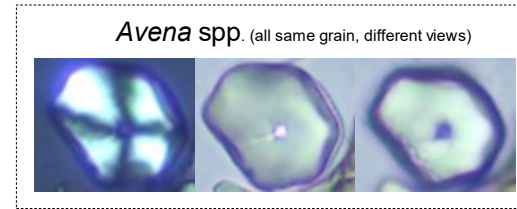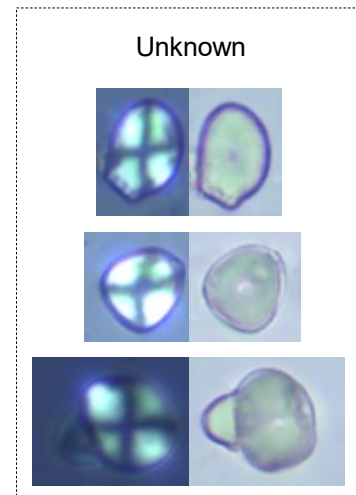

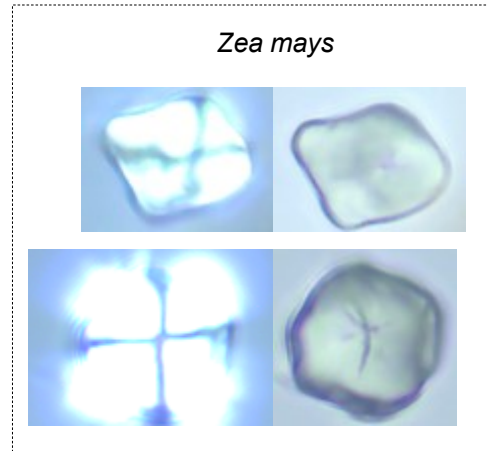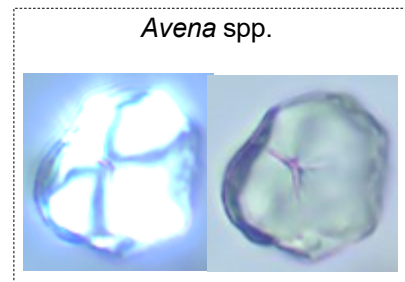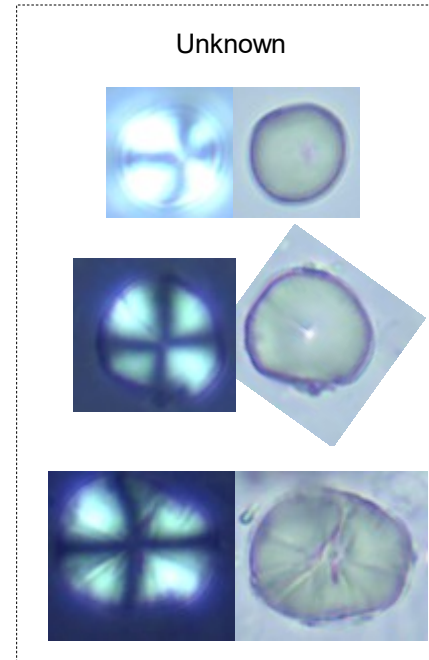

Other unknown organic material

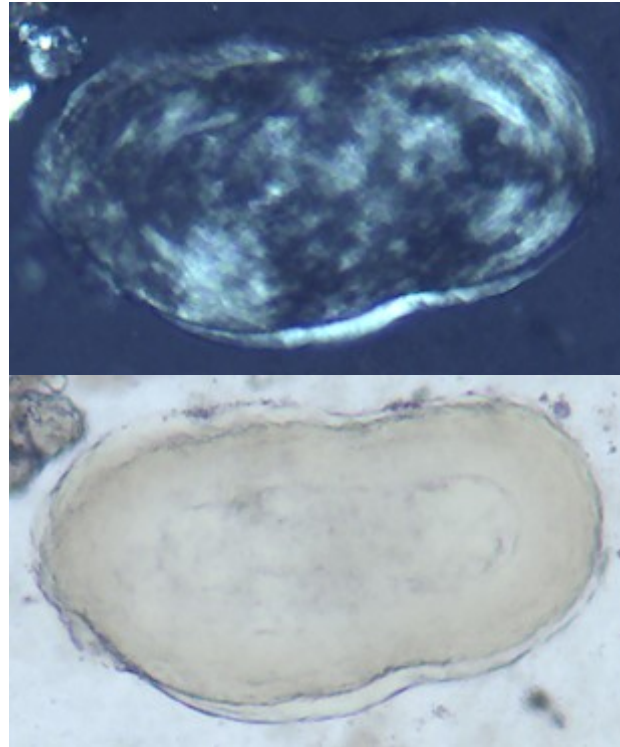

*Zea mays*

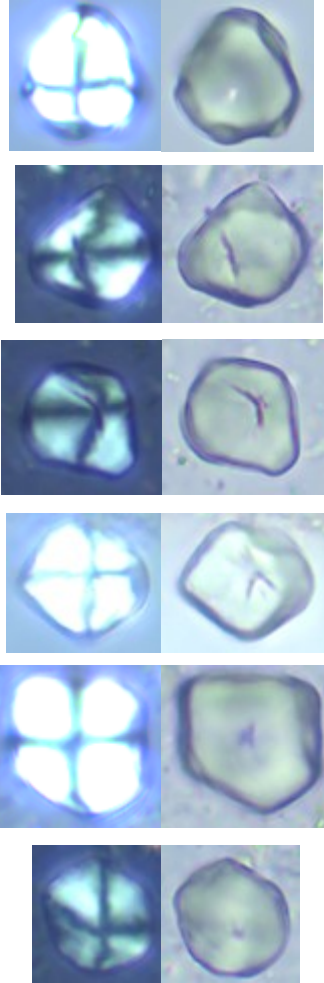

*Avena spp.*

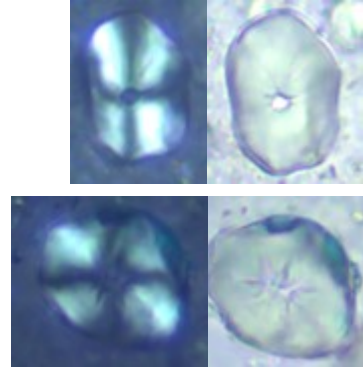

Malted *Hordeum spp.?*

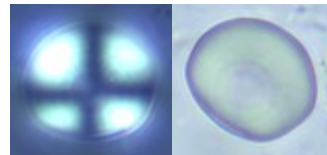

Unknown

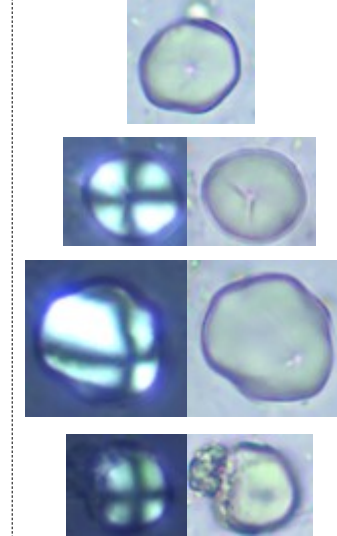



Fungus

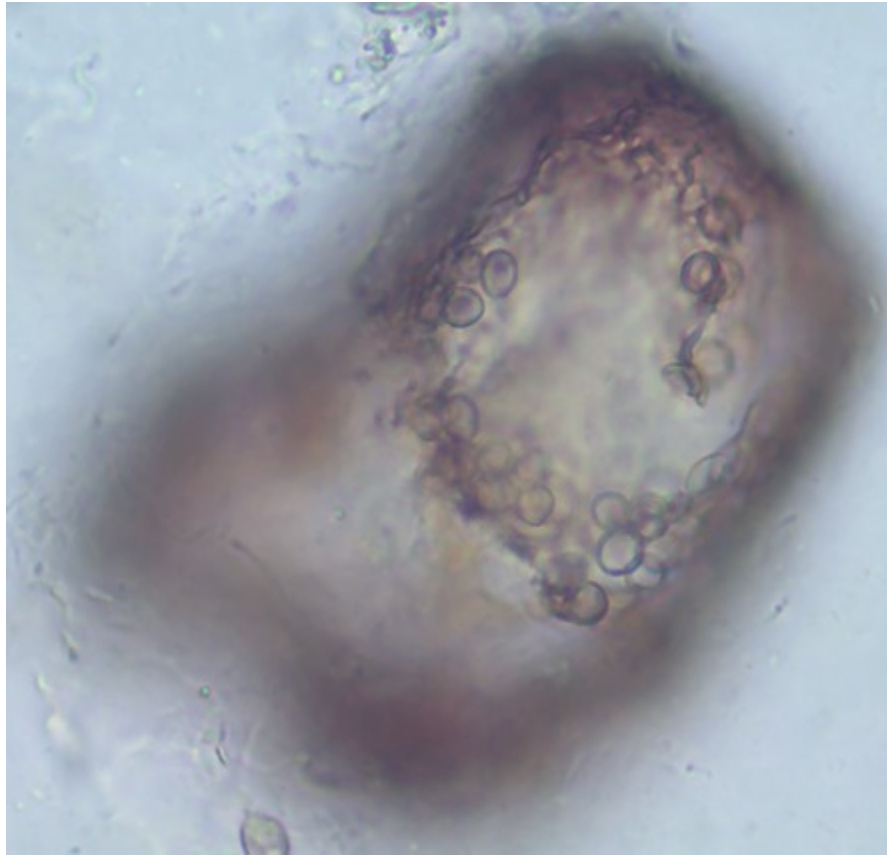

10  $\mu\text{m}$

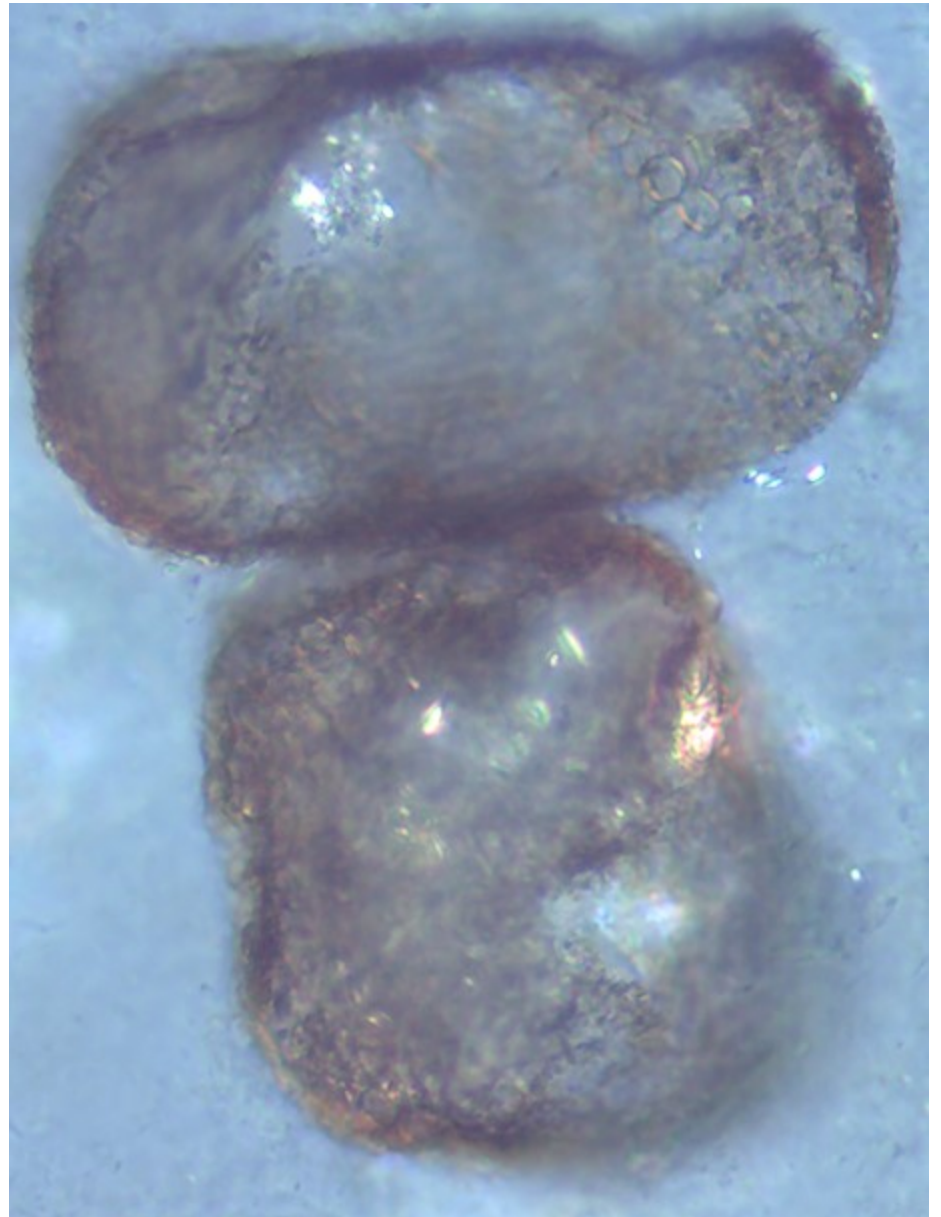

Fungus

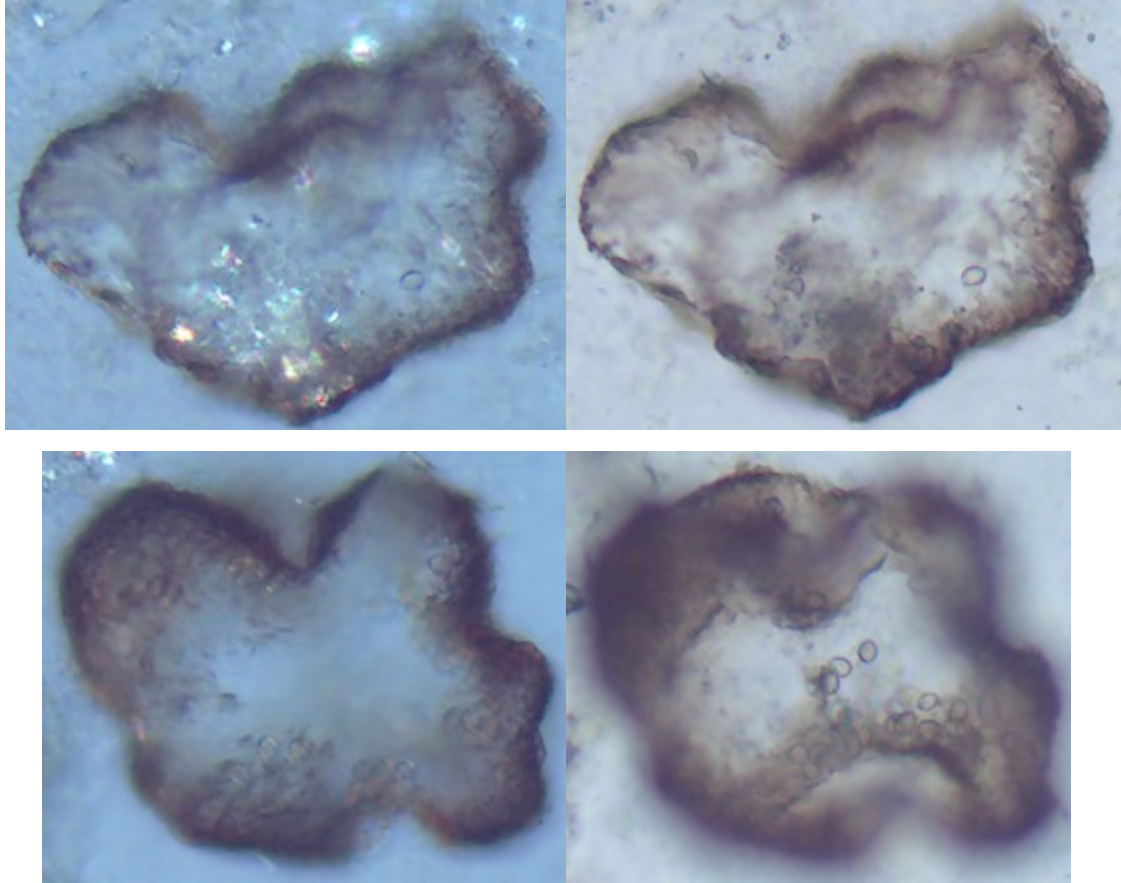

Kilkenny Union Workhouse (05E0435)  
Microparticle Lab # 30  
Burial CCXXXIV (26–35 years, Female)

Hairs/Fibres

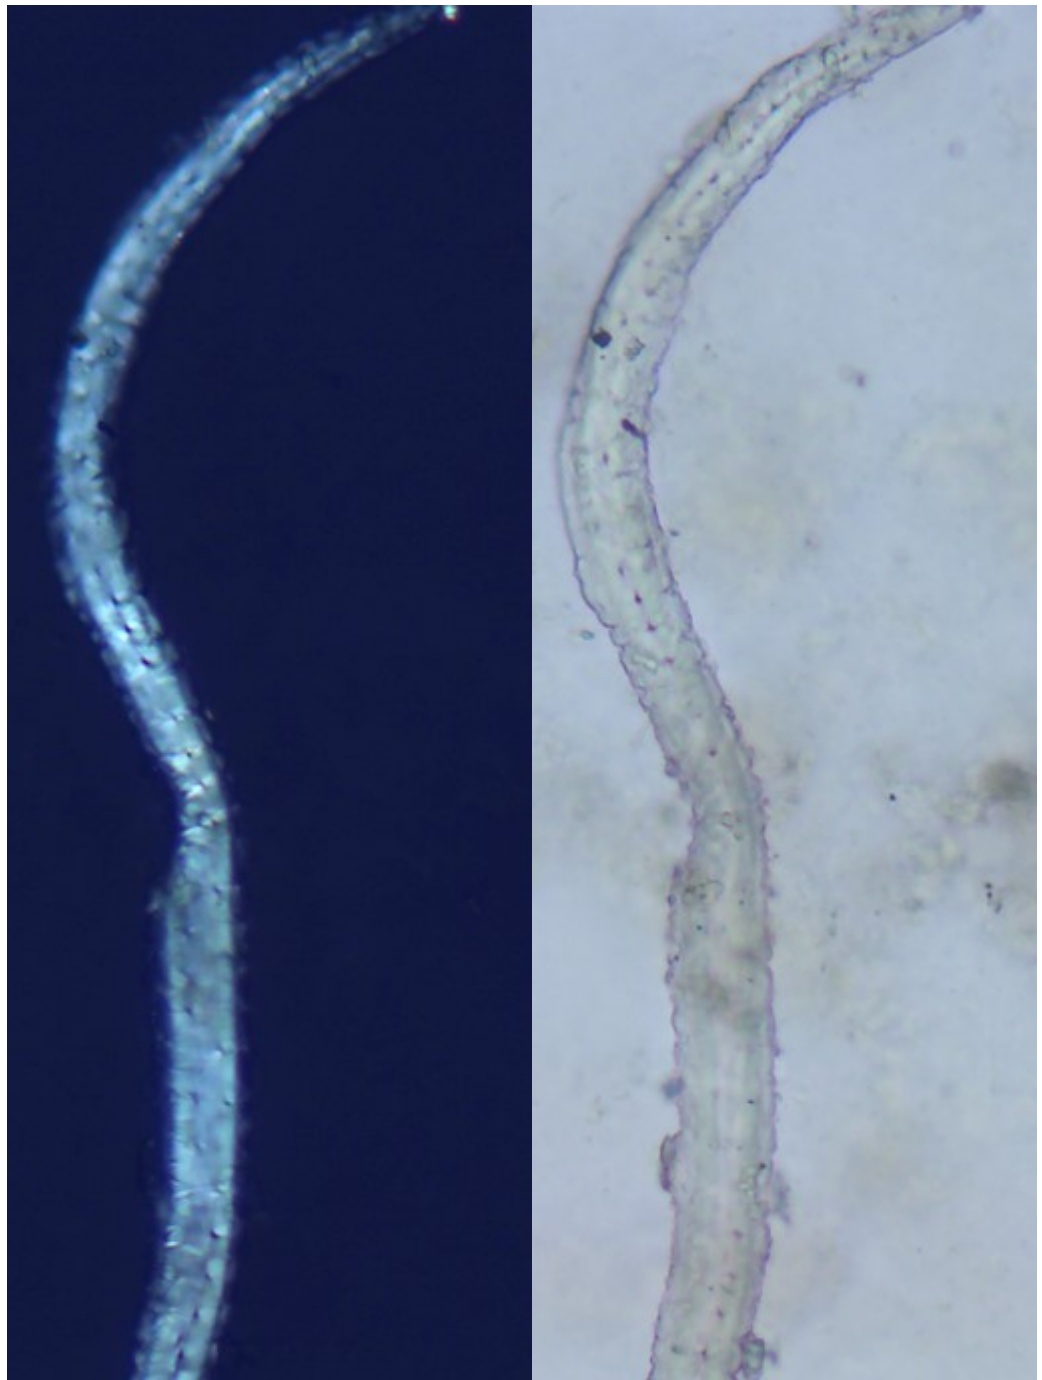

10  $\mu$ m

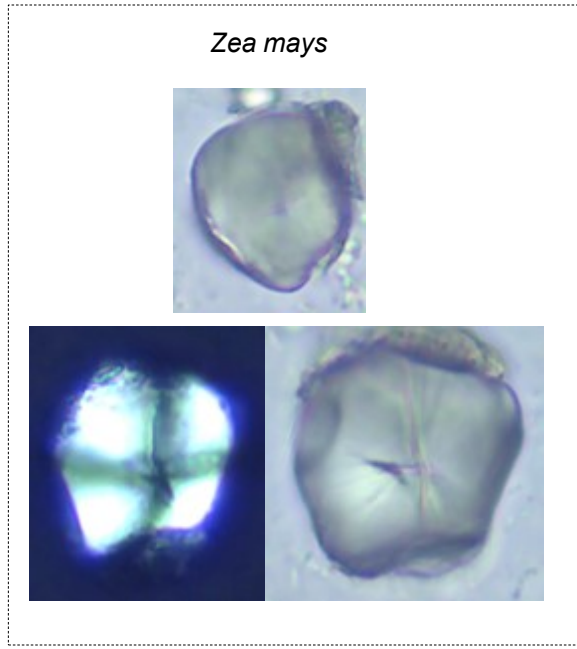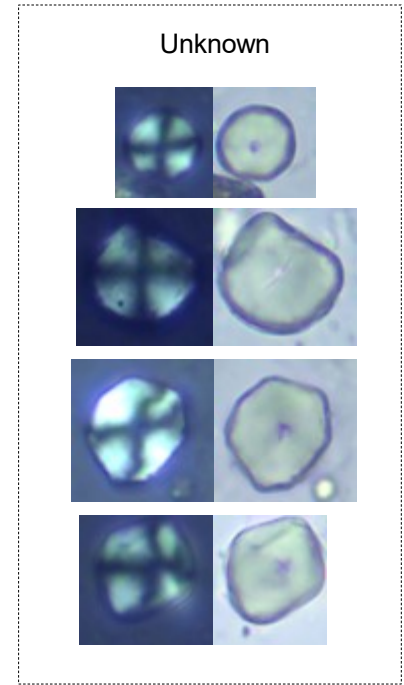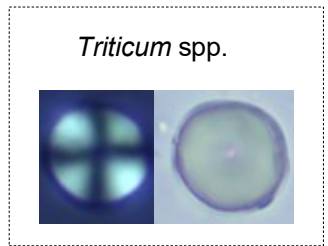

Hairs/Fibres

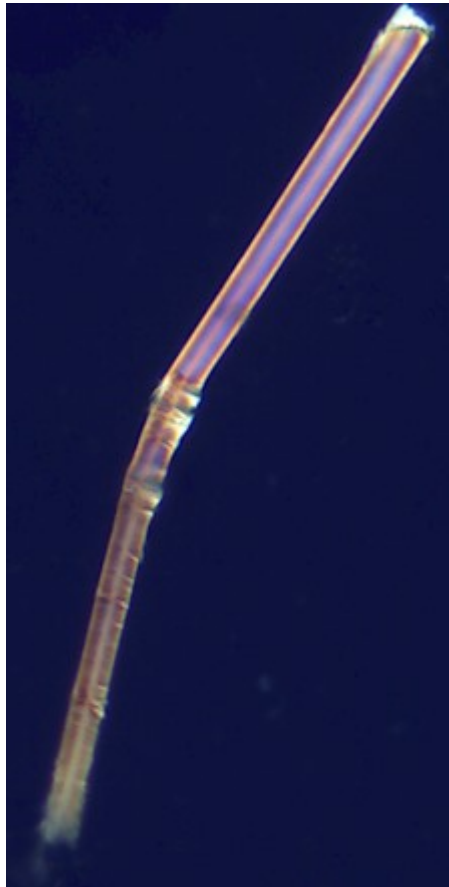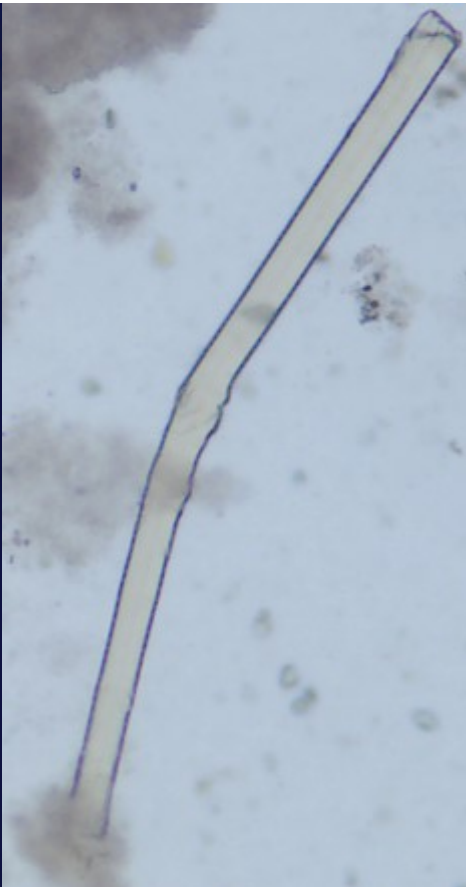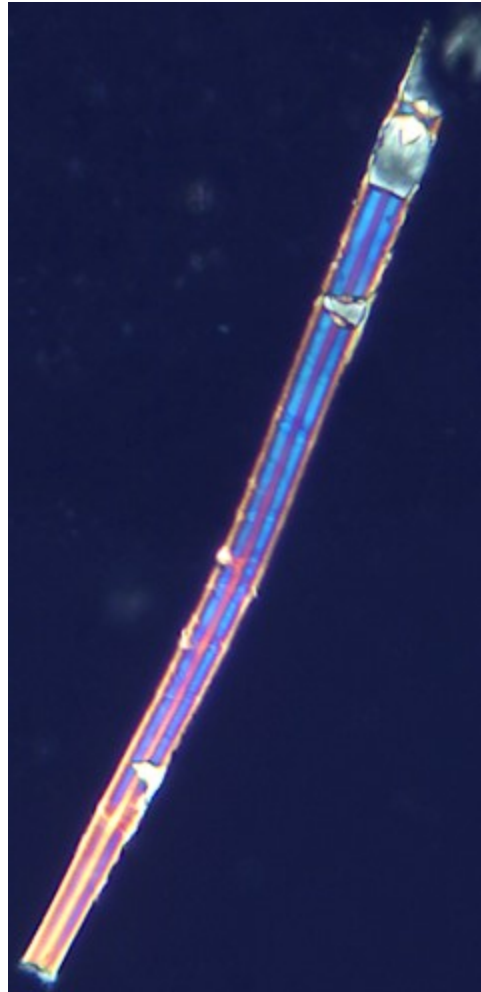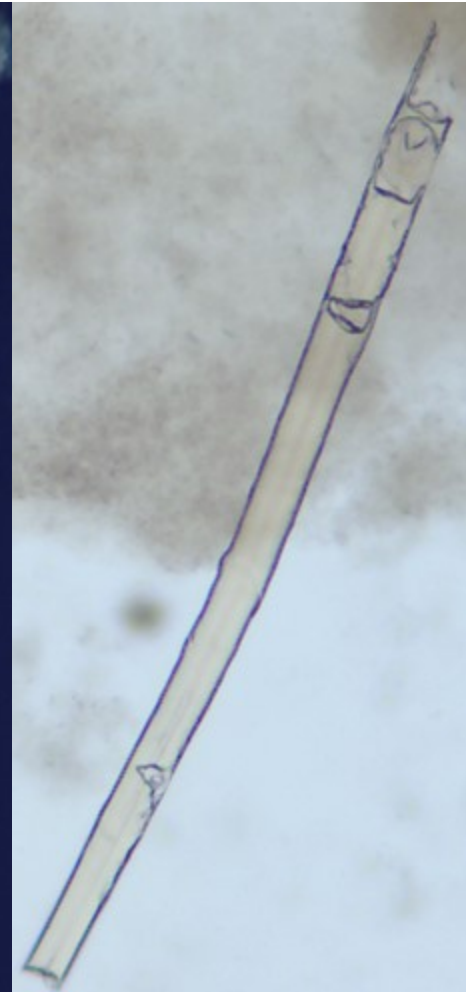

*Zea mays*

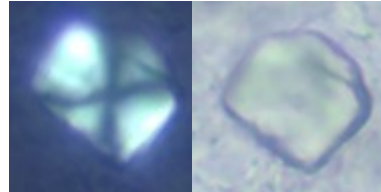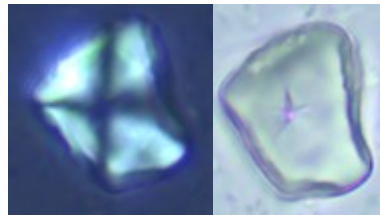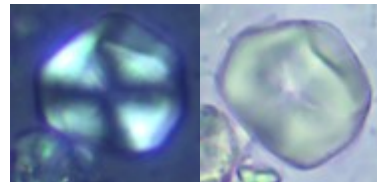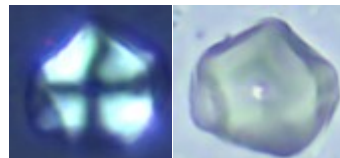

*Triticum* spp.

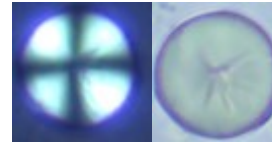

Kilkenny Union Workhouse (05E0435)  
Microparticle Lab # 32  
Burial DCLXXXIII (36–45 years, Male)

Fungus

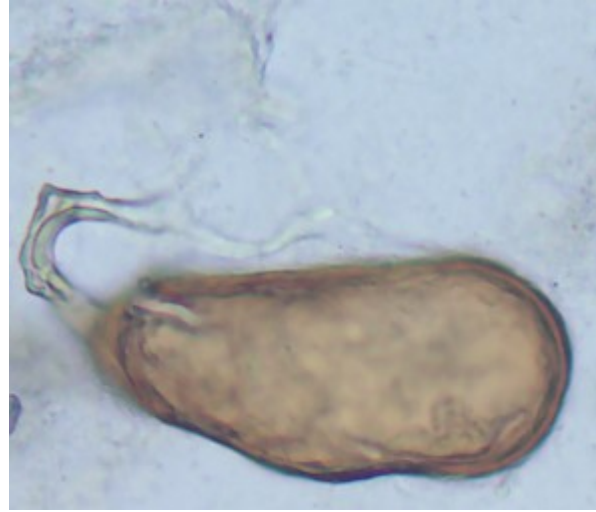

10  $\mu$ m

Fungus

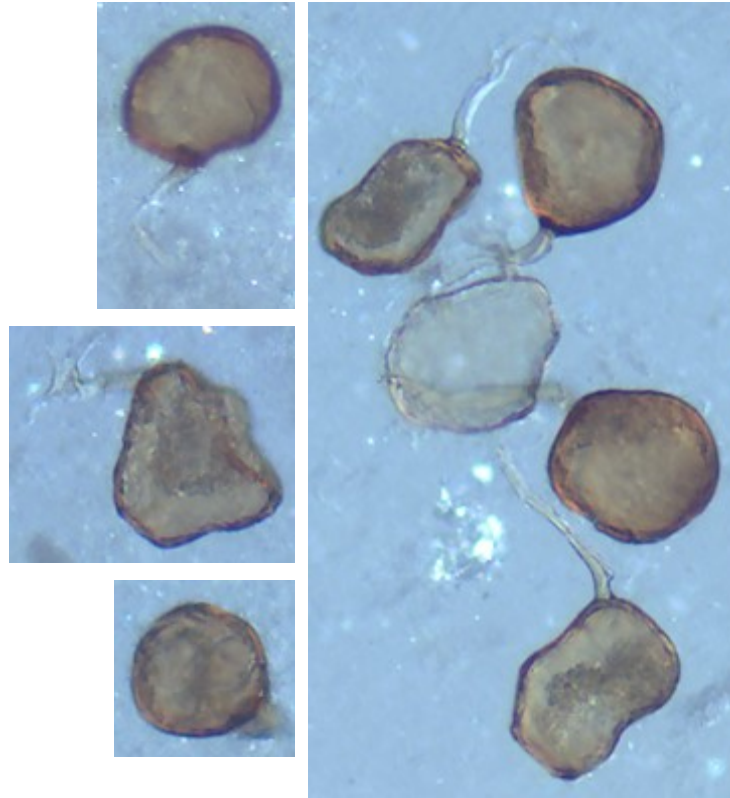



*Zea mays*

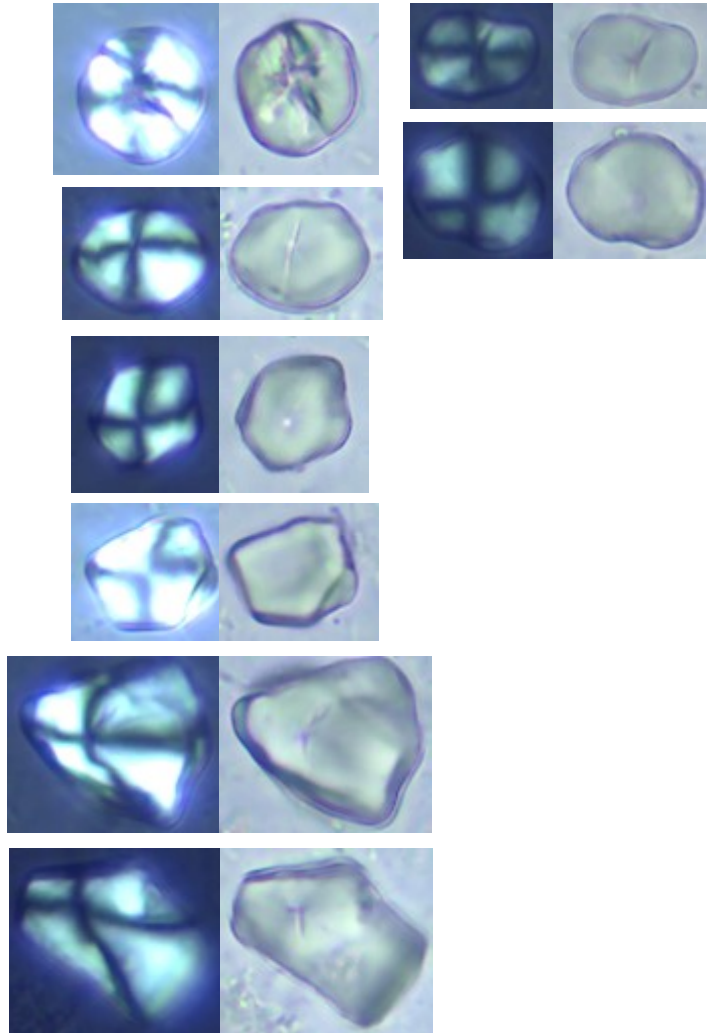

*Triticum* spp.

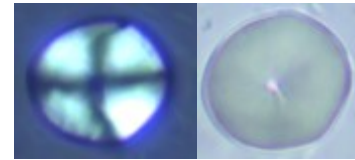

Unknown

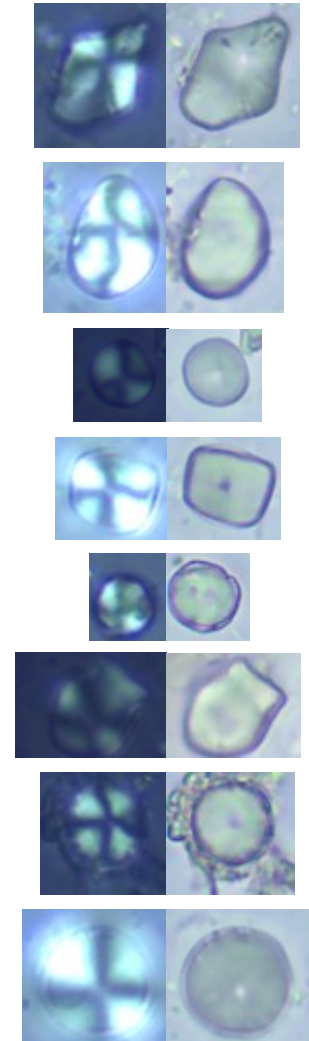

Fungus

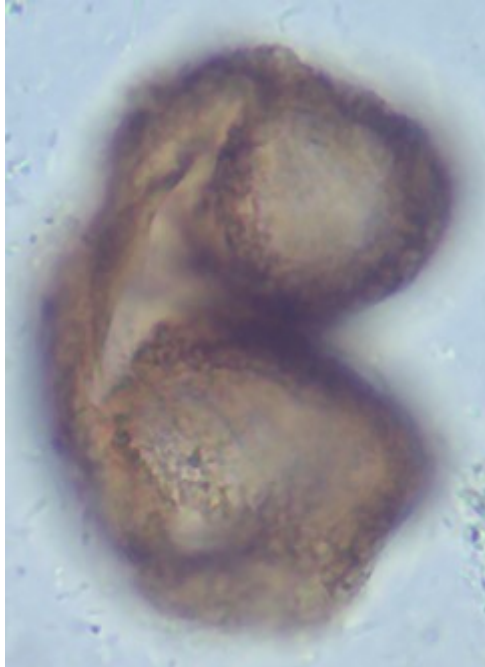

Hairs/Fibres

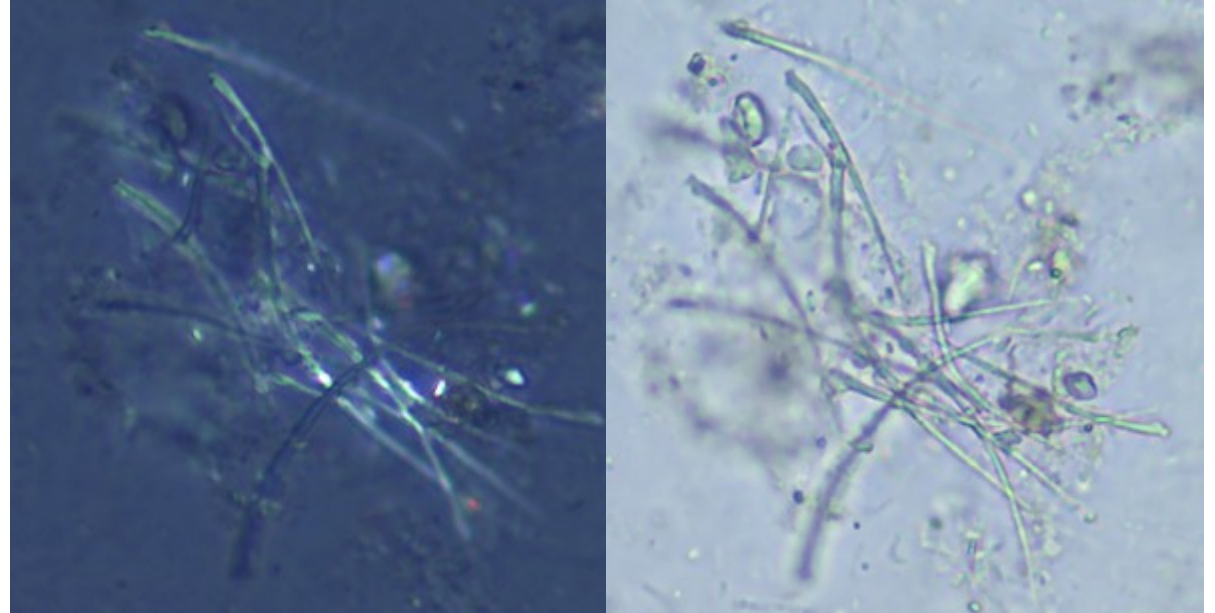

Kilkenny Union Workhouse (05E0435)  
Microparticle Lab # 33  
Burial CCCXXI (26–35 years, Female)

Hairs/Fibres

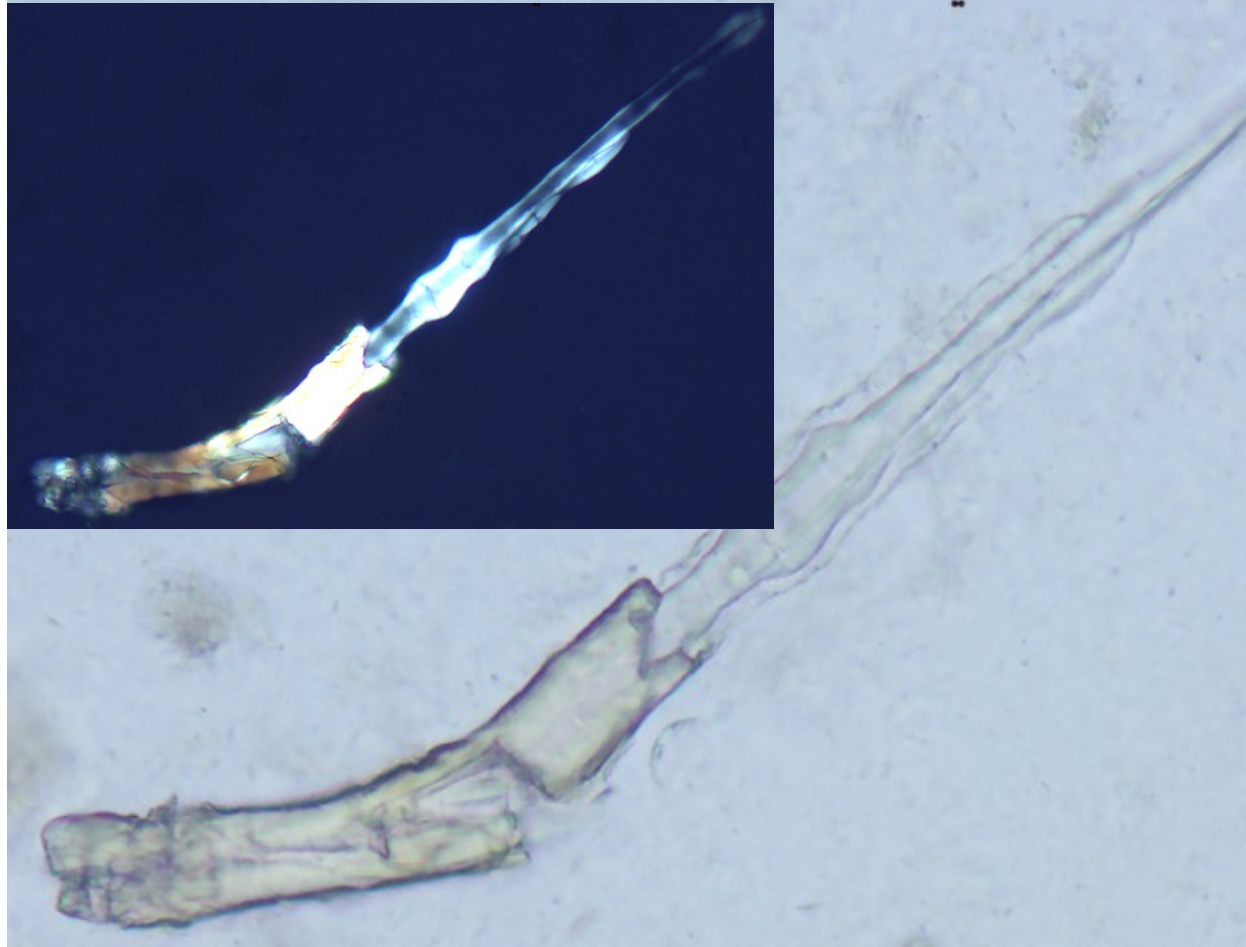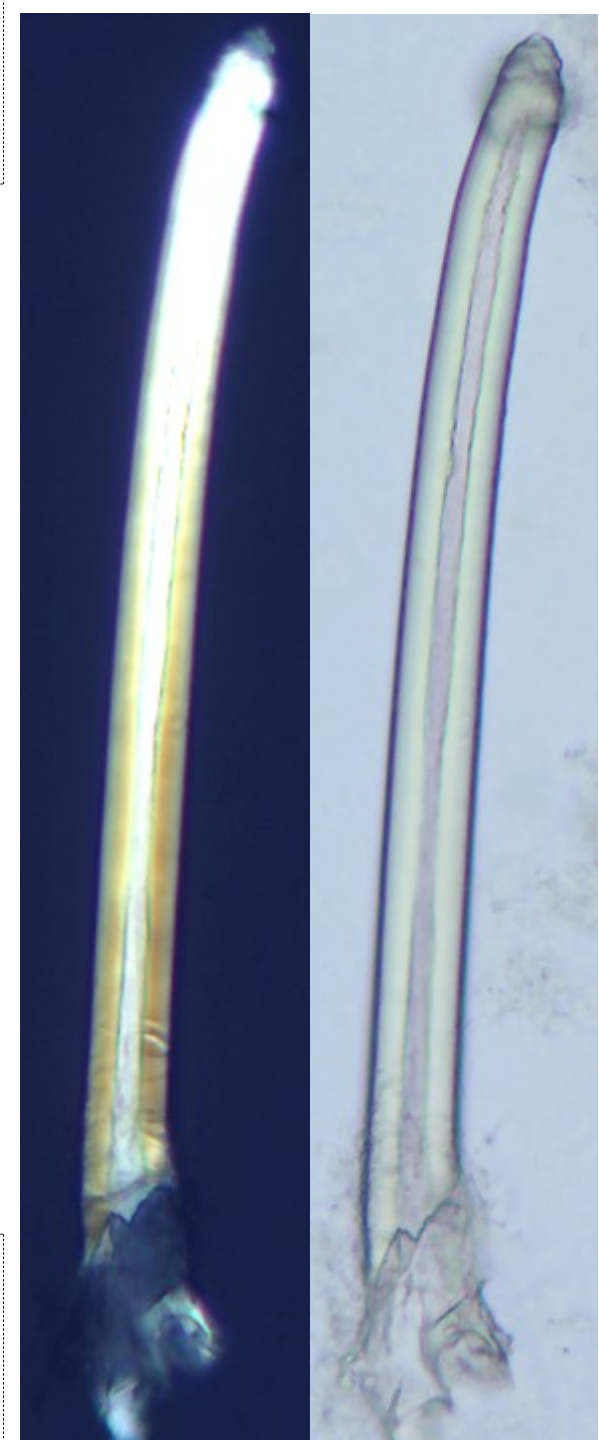

—  
10  $\mu\text{m}$

Kilkenny Union Workhouse (05E0435)  
Microparticle Lab # 33  
Burial CCCXXI (26–35 years, Female)

Hairs/Fibres

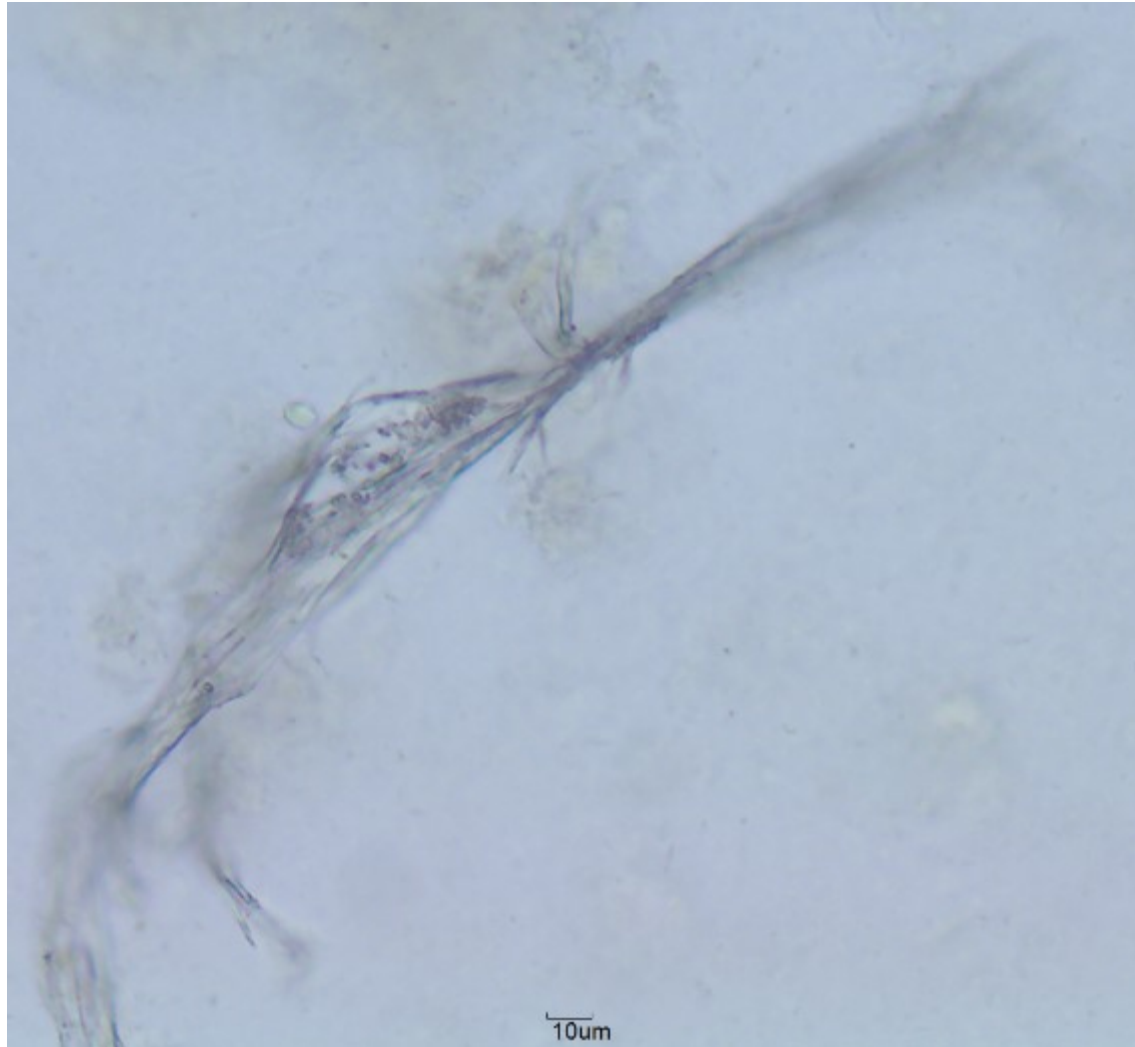

10 µm

Hairs/Fibres

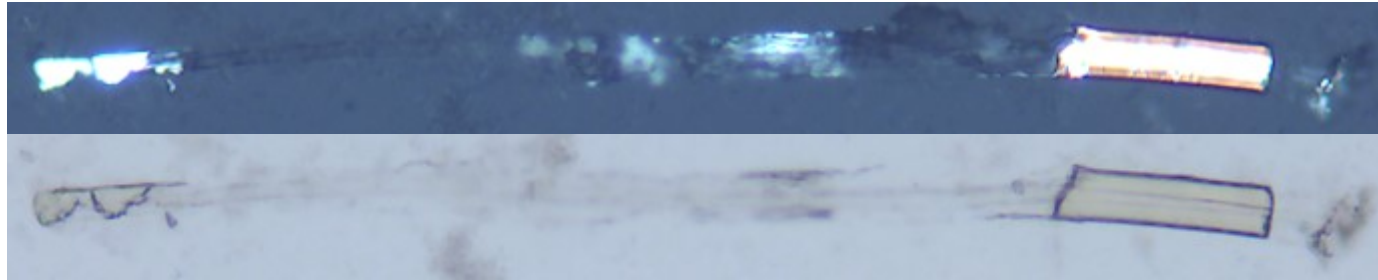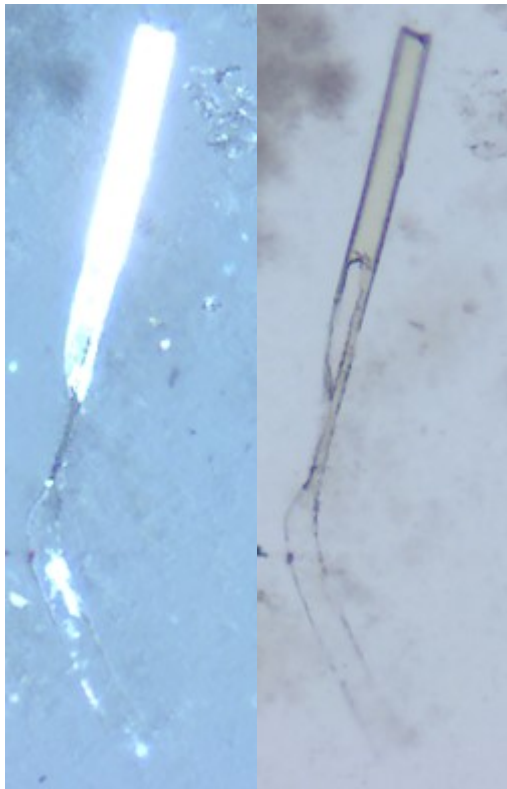

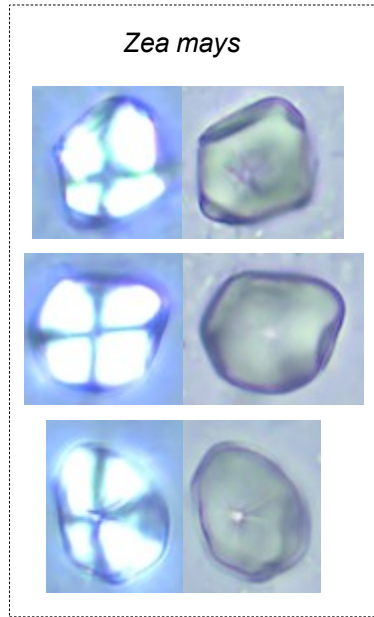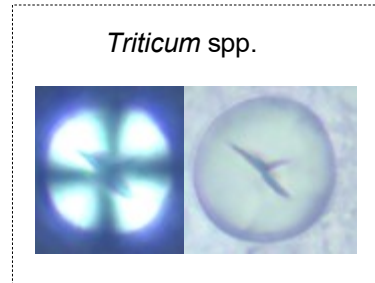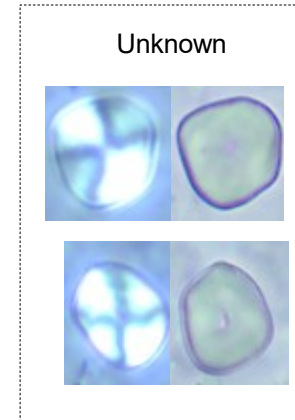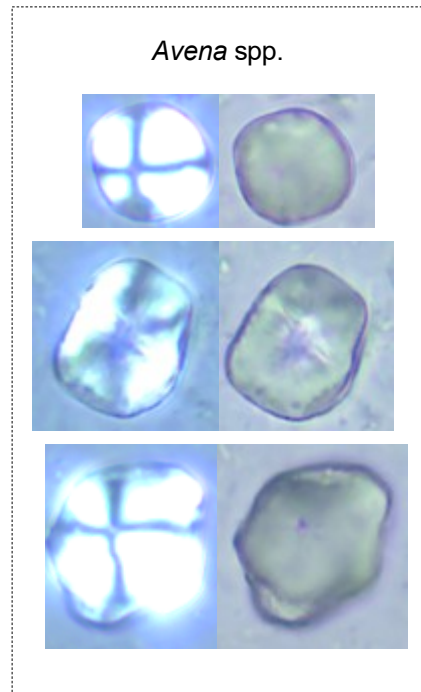

Other unknown organic material

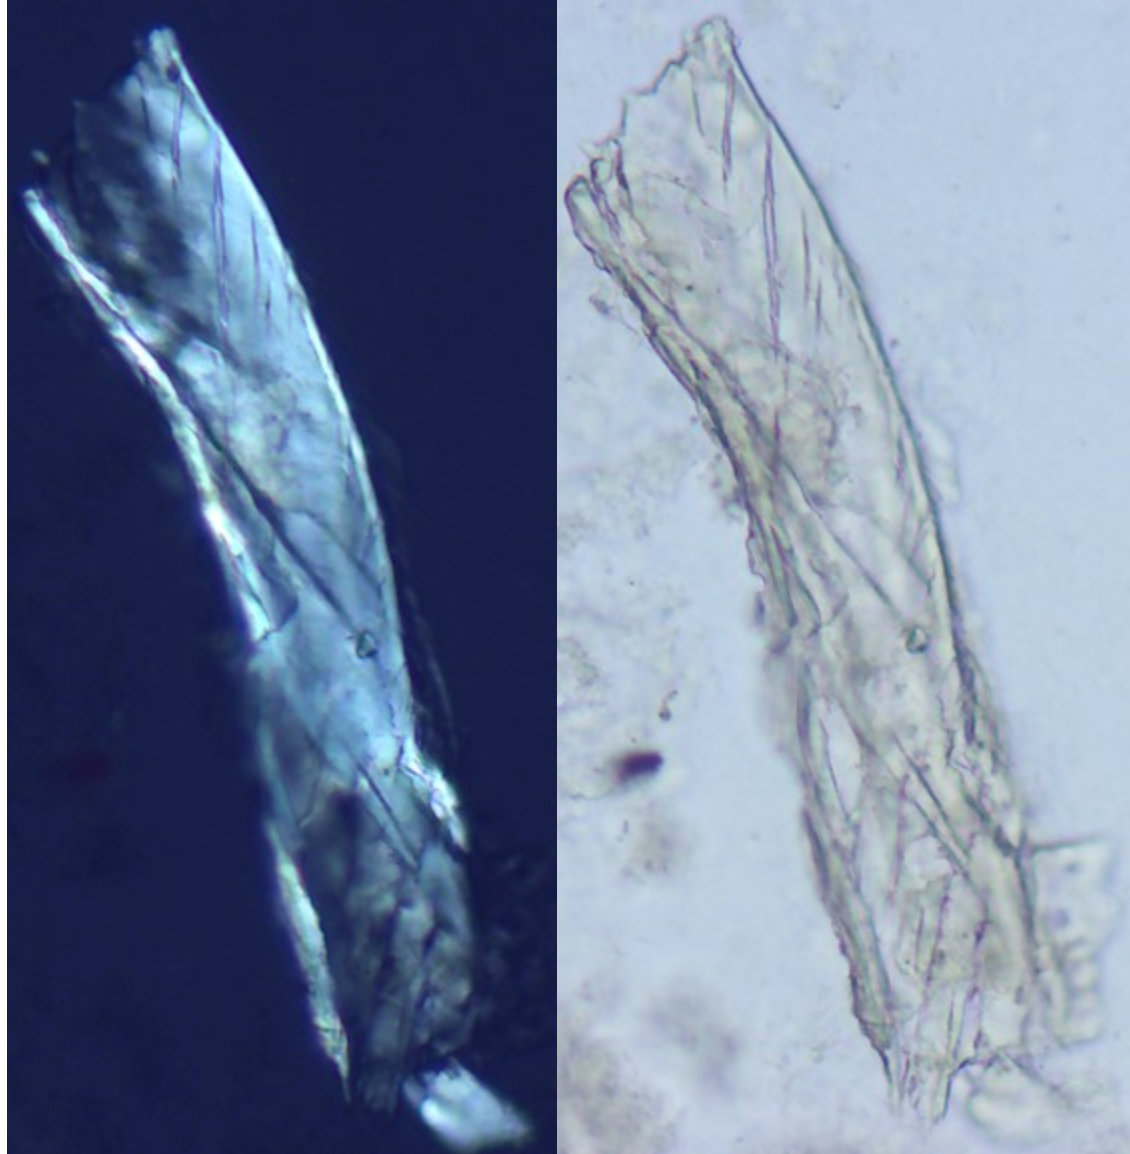

10  $\mu$ m

Fungus

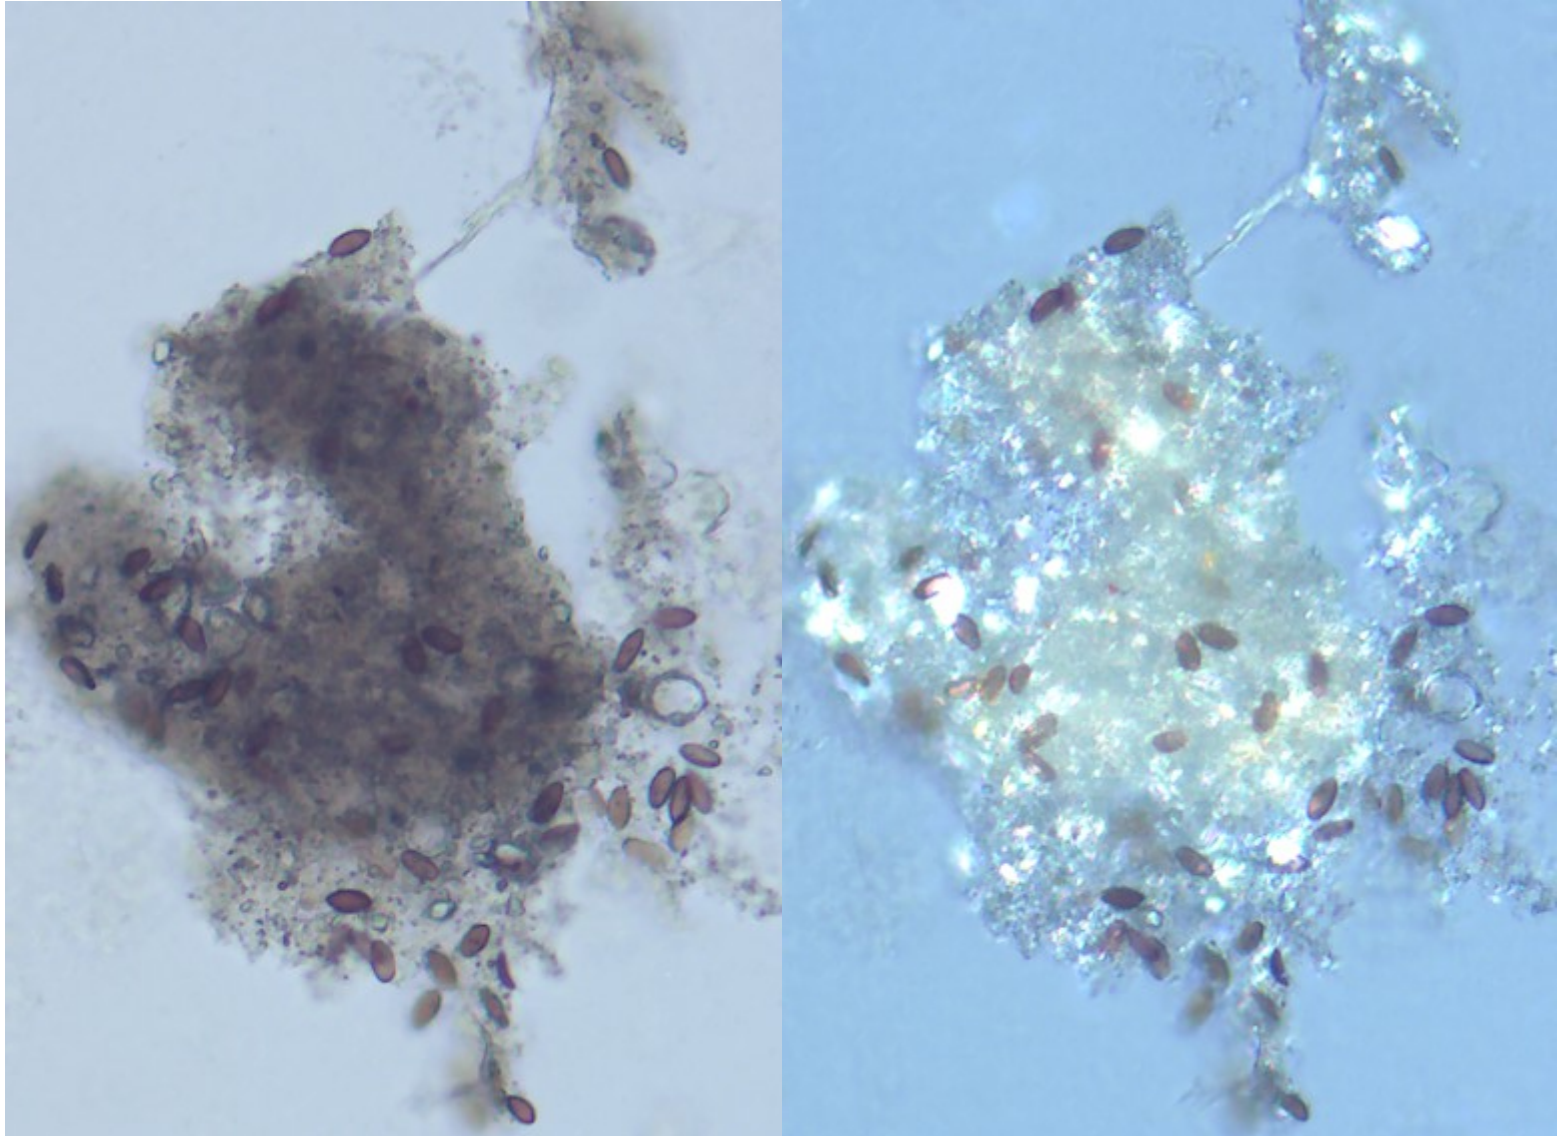



Hairs/Fibres

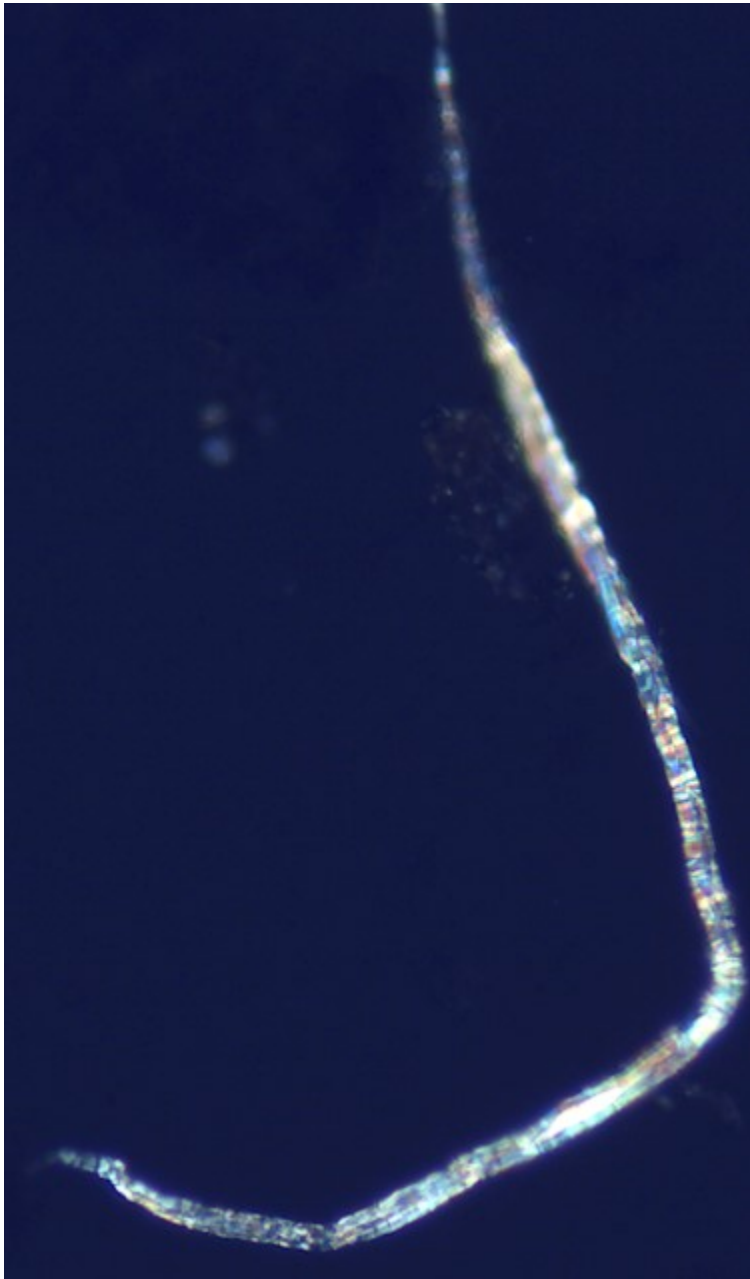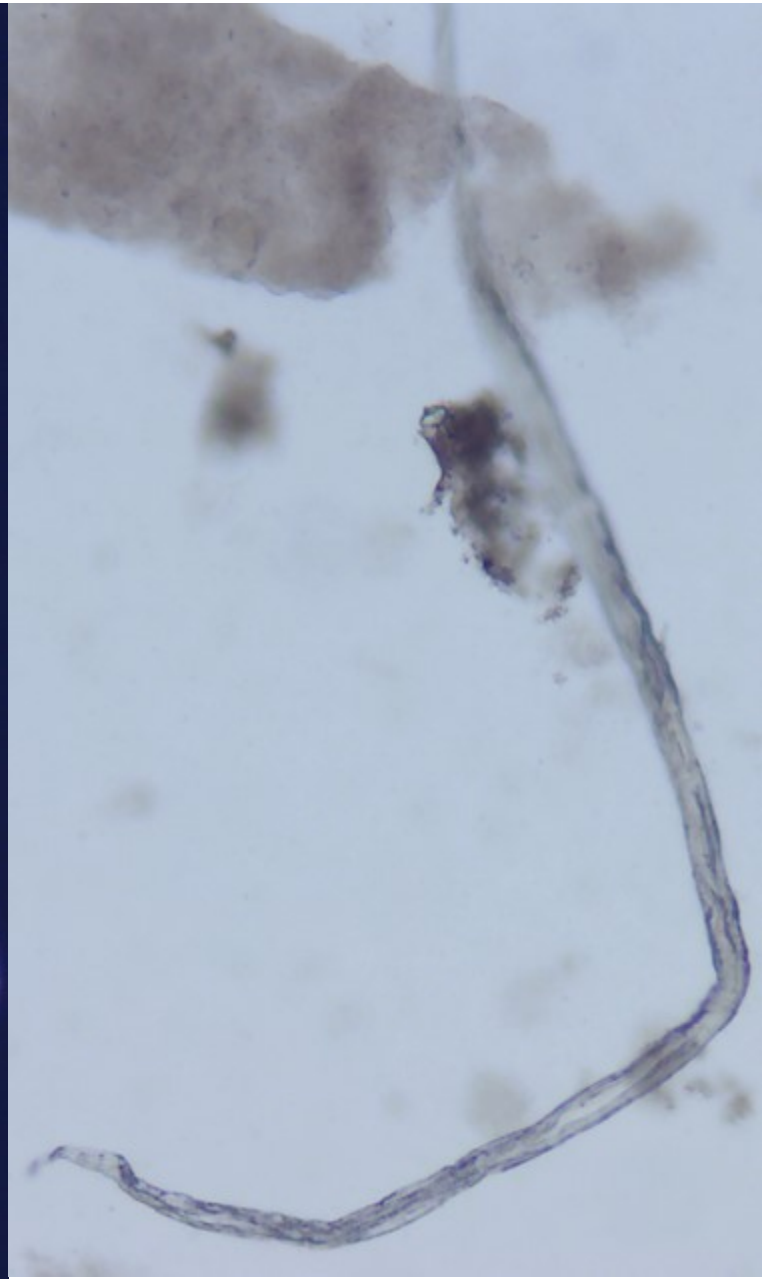

100  $\mu$ m

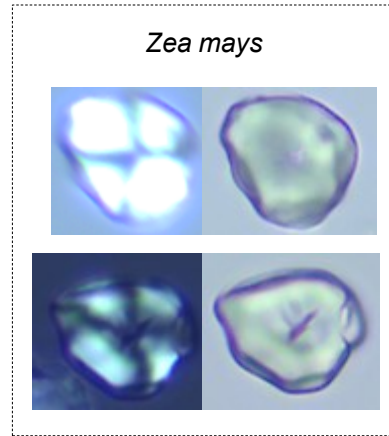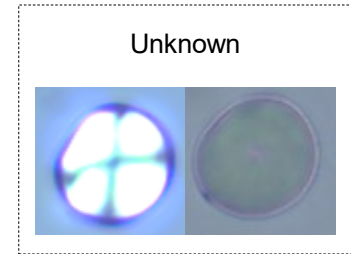

*Zea mays*

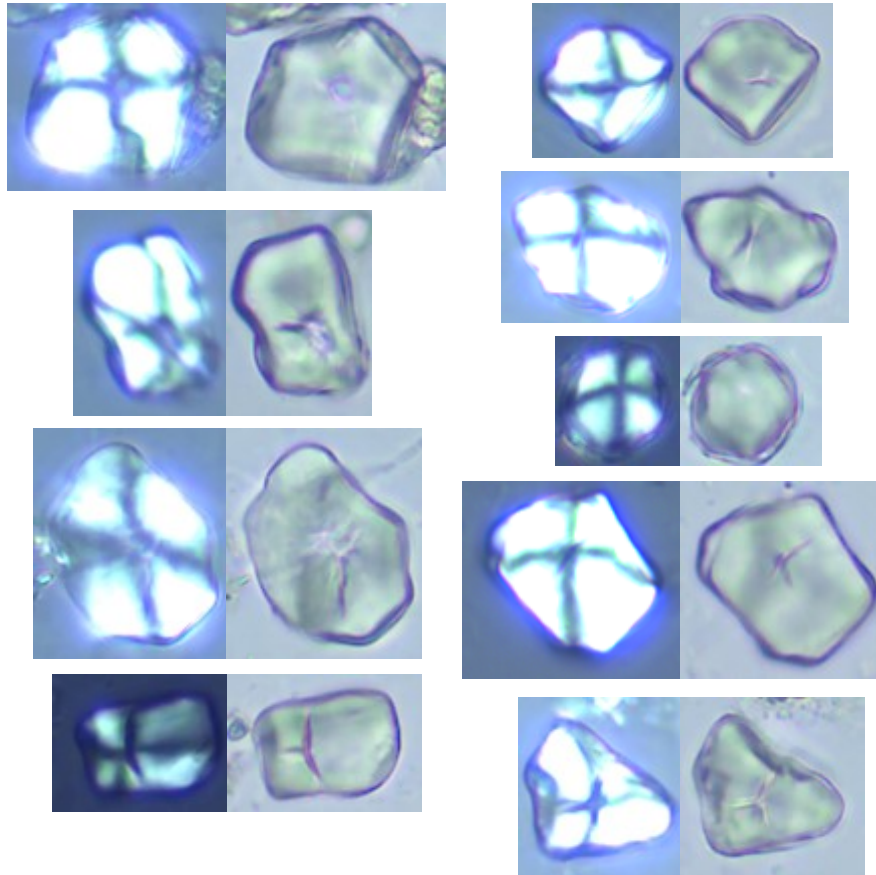

*Triticum* spp.

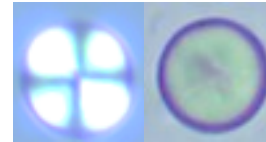

Unknown

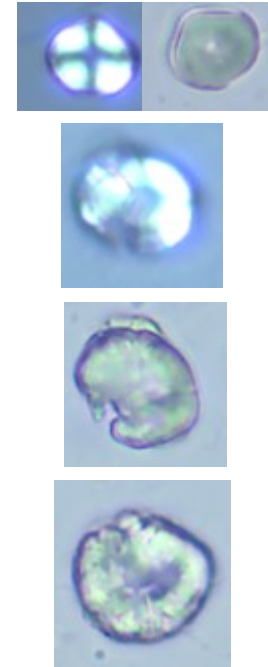

*Zea mays*

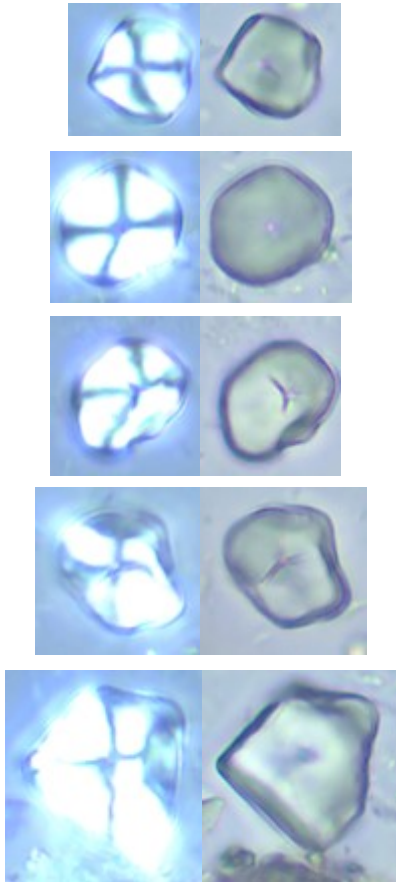

*Solanum tuberosum*

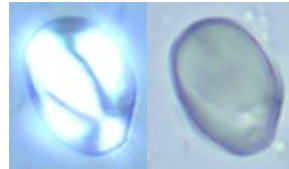

Unknown

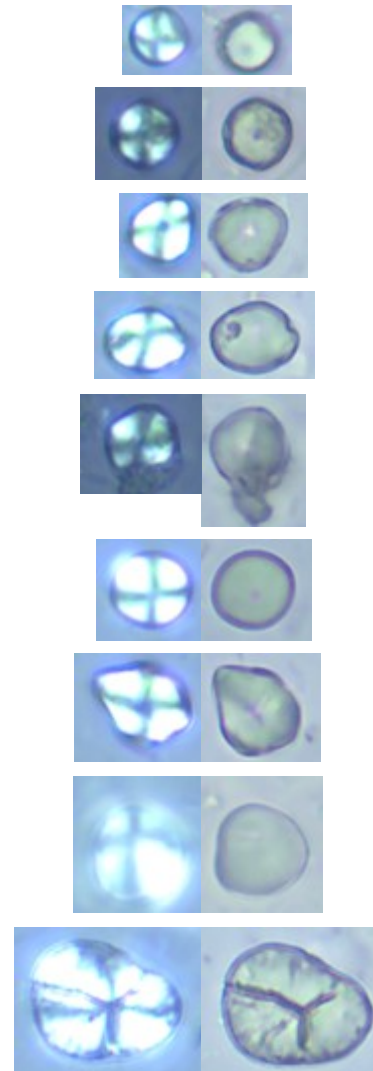

Starch? (not counted)

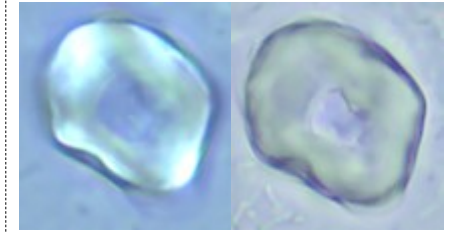

*Zea mays*

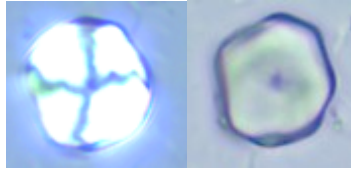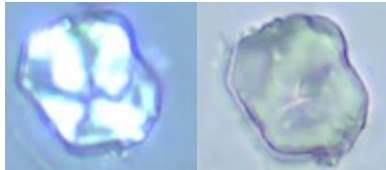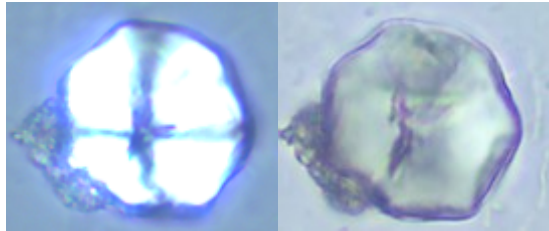

*Solanum tuberosum*

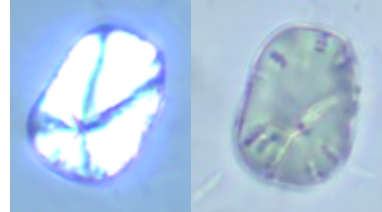

*Triticum* spp.

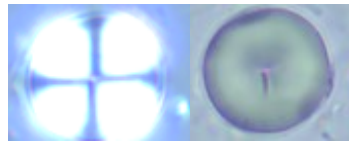

Unknown

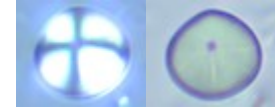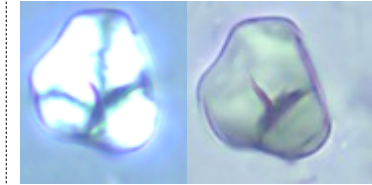

*Zea mays*

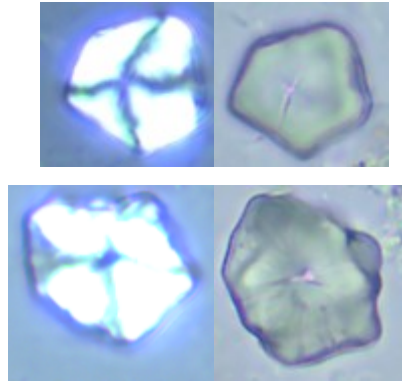

Unknown

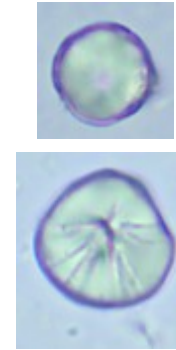

Kilkenny Union Workhouse (05E0435)  
Microparticle Lab # 39  
Burial CCCXCVI (26–35 years, Male)

Hairs/Fibres

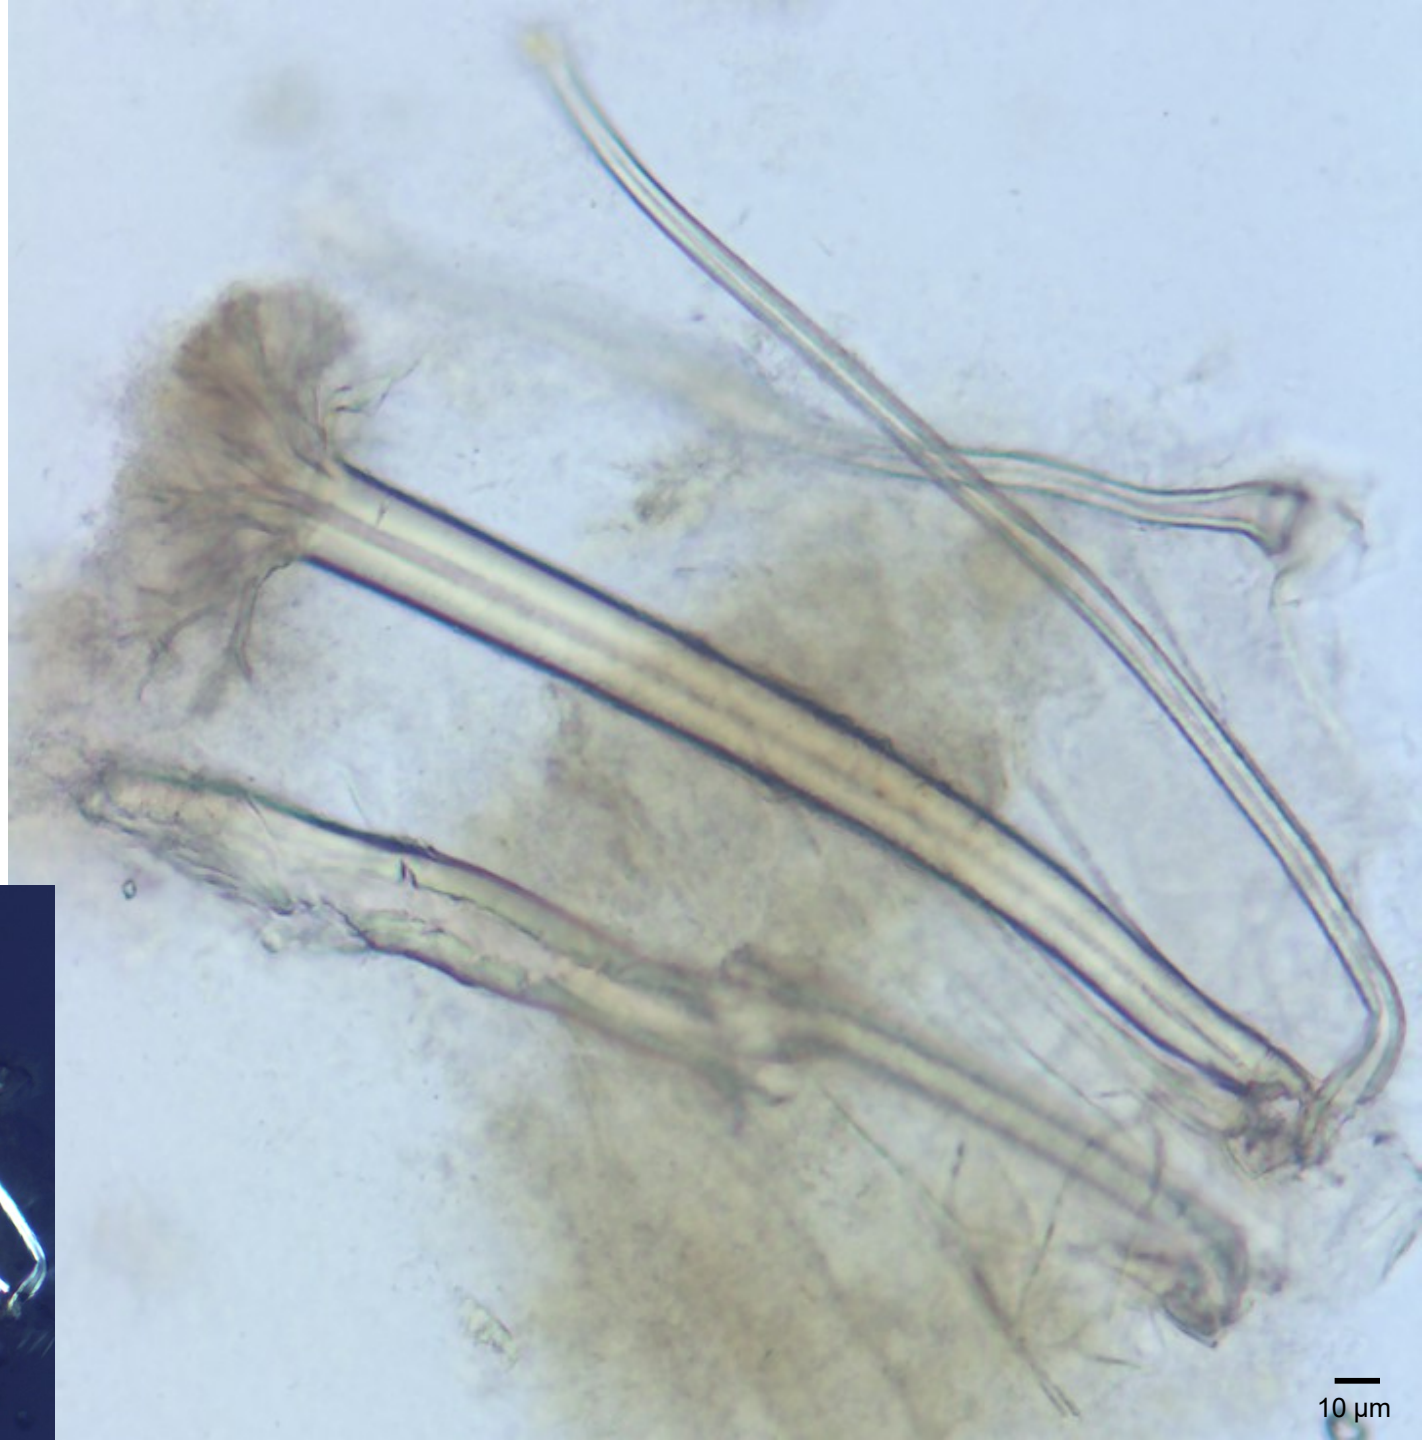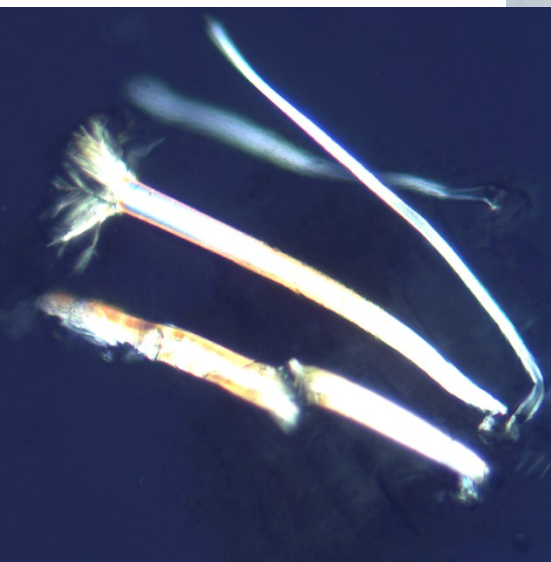

10  $\mu$ m

Kilkenny Union Workhouse (05E0435)  
Microparticle Lab # 39  
Burial CCCXCVI (26–35 years, Male)

Hairs/Fibres

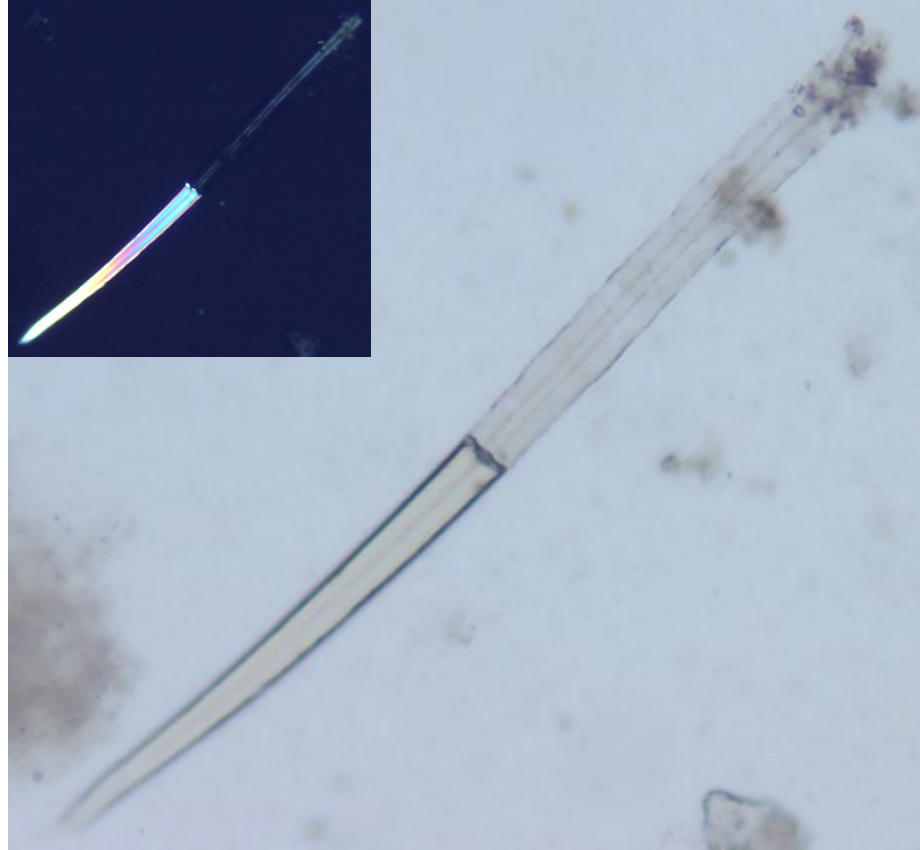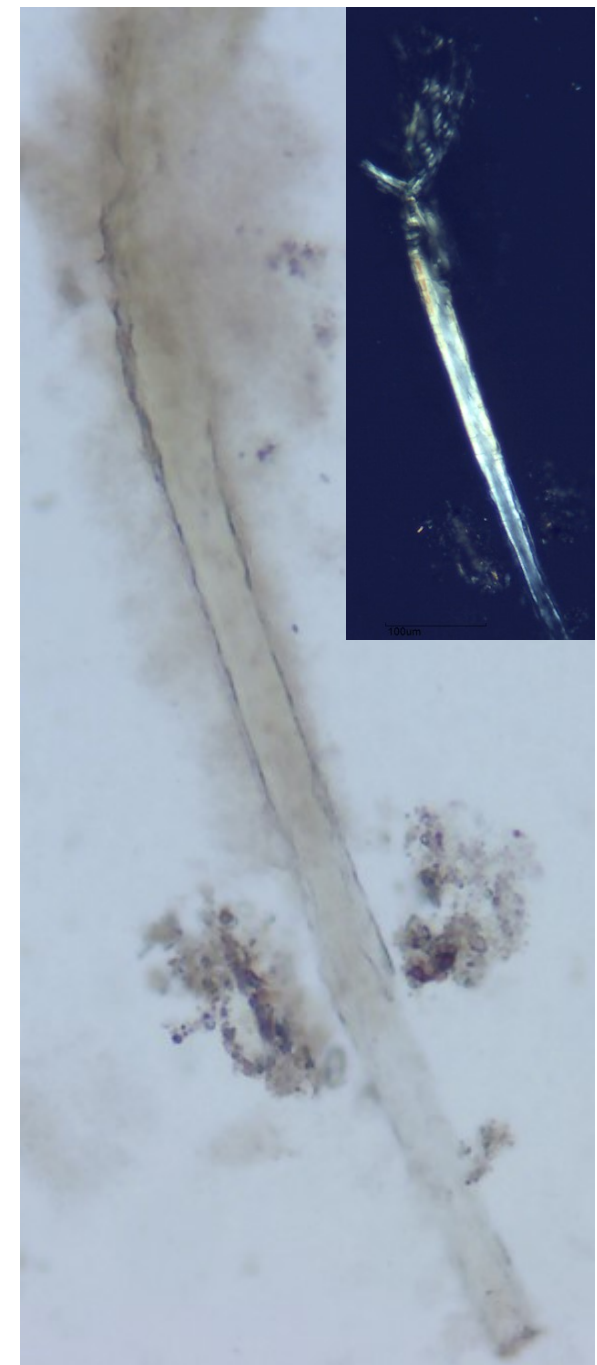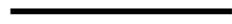

100 µm



*Zea mays*

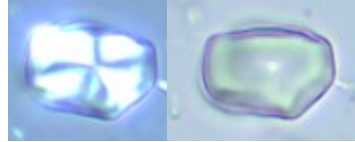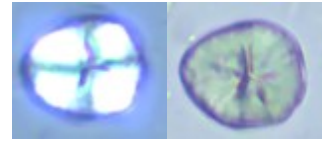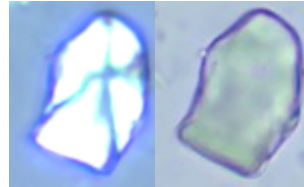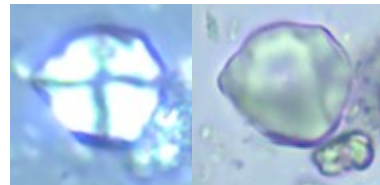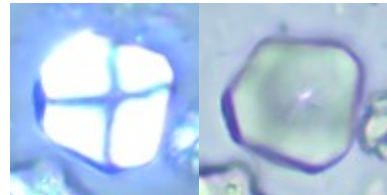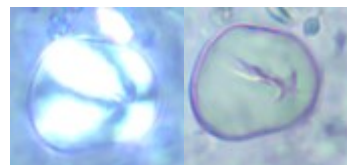

*Avena* spp.

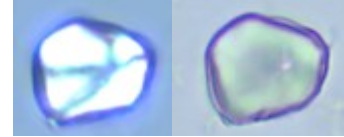

Unknown

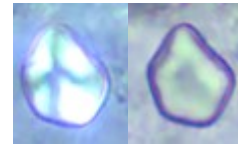

Other unknown organic material

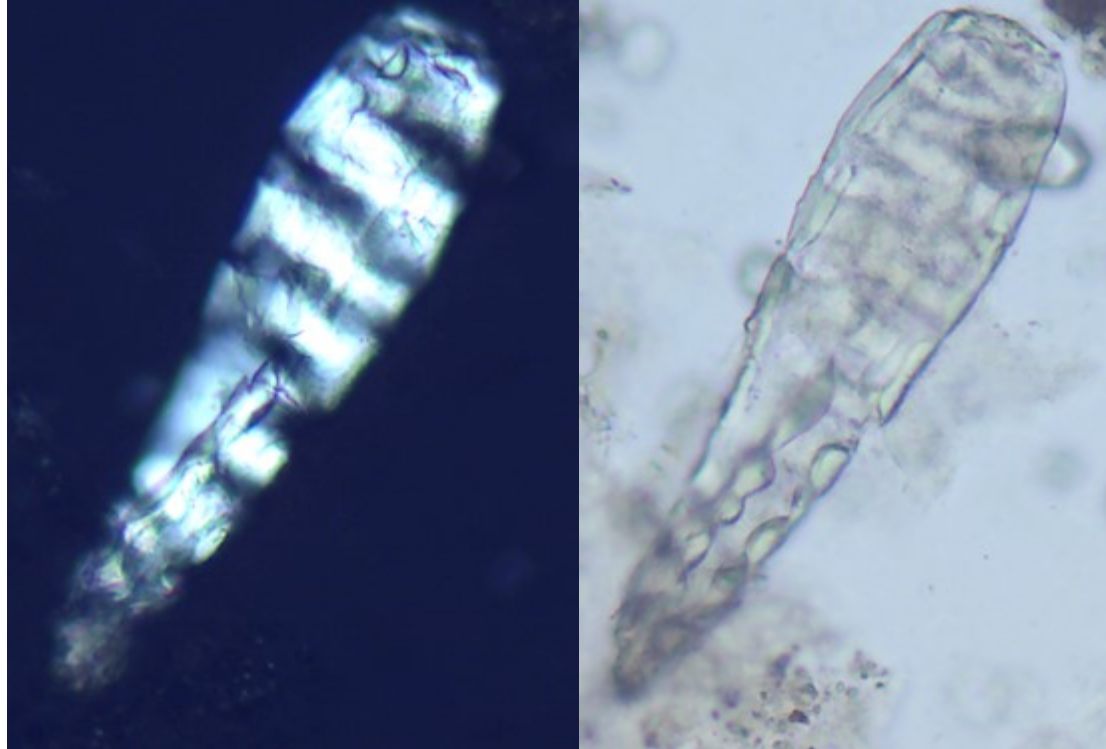

*Zea mays*

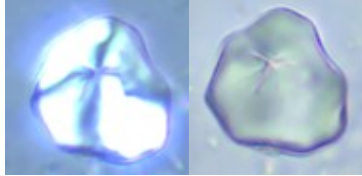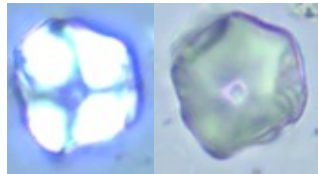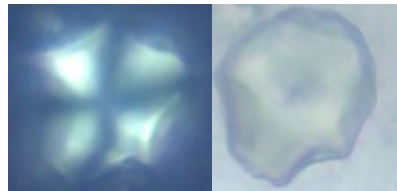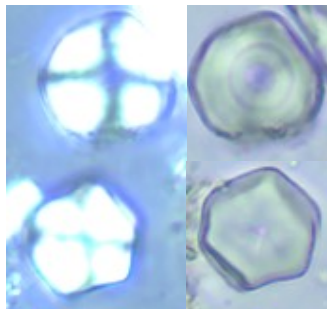

*Avena spp.*

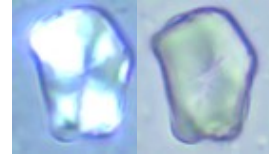

Unknown

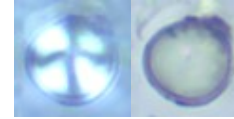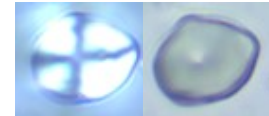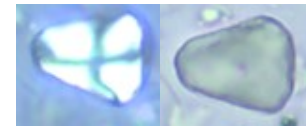

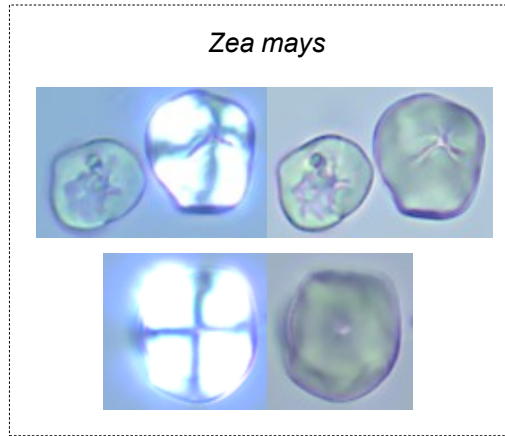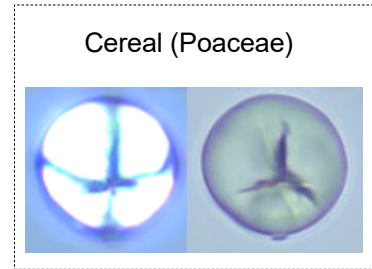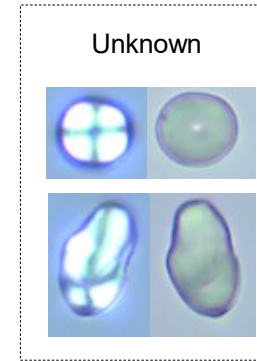

Supplement: pnas.1908839116.sd05.pdf [file pnas.1908839116.sd05.pdf]
